# Supplementary material for: Crystallinity reduction and enhancement in the chemical reactivity of cellulose by non-dissolving pre-treatment with tetrabutylphosphonium acetate
Source: Springer Nature journal article supplement (doi:10.1007/s10570-020-03044-6), 2020-02-18
Supplement: MOESM1 [file 17721584]

**Supporting Information**

Crystallinity reduction and enhancement in the chemical reactivity of cellulose by non-dissolving pre-treatment with tetrabutylphosphonium acetate.

Daniel Rico del Cerro, Tetyana V. Koso, Tia Kakko, Alistair W. T. King*, Ilkka Kilpeläinen*.

Laboratory of Organic Chemistry, University of Helsinki

P.O Box 55, 00014 University of Helsinki, Finland

[*ilkka.kilpelainen@helsinki.fi](mailto:*ilkka.kilpelainen@helsinki.fi) and alistair.king@helsinki.fi

**Abstract** Herein, we demonstrate the activation of commercial chemical cellulose pulps towards chemical modification by a pre-treatment step with tetrabutylphosphonium acetate ([P4444][OAc]). A heterogeneous (non-dissolving) pre-treatment was applied allowing for a significant reduction in crystallinity, without concomitant formation of the thermodynamically stable cellulose II. An increase in chemical reactivity was demonstrated using two model reactions; 1) acetylation (organic swelling conditions), where high degrees of substitution (DS) were obtained without the need for a catalyst, and 2) 4-acetamido-TEMPO oxidation (aqueous swelling conditions), where significant degrees of oxidation (DO) were obtained, beyond those for the untreated pulps. In both tests a notable improvement in cellulose reactivity was observed. Regioselectivity of acetylation was assessed using 2D NMR for one low and one high DS sample. The low DS showed a small degree of acetylation of the 6-OH, whereas, the high DS from the pre-treated sample showed mainly mixtures of triacetate and diacetates. Important mechanistic information is attained for future development of aqueous and organic-based reactions involving this ionic liquid pre-treatment.

**Keywords**

Mercerization, cellulose acetate, TEMPO oxidation, ionic liquid, pulp reactivity.

**Table of Contents**

[1. General information 3](#_Toc31272650)

[2. Pre-treatments with pure [P4444][OAc] 3](#_Toc31272651)

[**a.** **Pre-treatment of Enocell pulp** 3](#_Toc31272652)

[**b.** **Pre-treatment of birch kraft pulp** 3](#_Toc31272653)

[**c.** **Pre-treatment of eucalyptus kraft pulp** 3](#_Toc31272654)

[3. Dissolved & regenerated pulps from [P4444][OAc]:DMSO-d6 (35:65 wt%) 4](#_Toc31272655)

[**a.** **Enocell pulp** 4](#_Toc31272656)

[**b.** **Birch pulp** 4](#_Toc31272657)

[**c.** **Eucalyptus pulp** 4](#_Toc31272658)

[4. Crystallinity index (CI) and periodic plane size determination (Scherrer equation) 4](#_Toc31272659)

[**a.** **Amorphous standard preparation** 4](#_Toc31272660)

[**b.** **Deconvolution Method** 5](#_Toc31272661)

[**c.** **Periodic Plane Determination using the Scherrer Equation** 15](#_Toc31272662)

[5. Acetylation as first model reaction 16](#_Toc31272663)

[**a.** **Preparation of standard samples for DS determination through diffusion-edited 1H experiments** 16](#_Toc31272664)

[i. Sample 1: DS value < 1 16](#_Toc31272665)

[ii. Sample 2: 1 > DS value < 1.5 16](#_Toc31272666)

[iii. Sample 3: 1.5 > DS value < 2 16](#_Toc31272667)

[**b.** **Acetylation of untreated pulps** 16](#_Toc31272668)

[**c.** **Acetylation of IL pre-treated pulps** 17](#_Toc31272669)

[i. Homogeneous route 17](#_Toc31272670)

[ii. Heterogeneous route 17](#_Toc31272671)

[**d.** **NMR analyses** 17](#_Toc31272672)

[i. NMR experimental 17](#_Toc31272673)

[ii. DS determination from 1H NMR 20](#_Toc31272674)

[iii. Xylan content determination 21](#_Toc31272675)

[iv. NMR data 24](#_Toc31272676)

[**e)** **ATR-IR analysis of acetylated samples** 48](#_Toc31272677)

[i) Description 48](#_Toc31272678)

[ii) ATR-IR data 50](#_Toc31272679)

[6. AcNH-TEMPO oxidation as second model reaction 58](#_Toc31272680)

[**a.** **Acidification of AcNH-TEMPO-oxidized samples for IR and GPC Analyses** 59](#_Toc31272681)

[**b.** **IR Analysis of AcNH-TEMPO-oxidised samples** 59](#_Toc31272682)

[**c.** **Conductometric titration for determination of carboxylate content of AcNH-TEMPO-oxidized cellulosic material** 64](#_Toc31272683)

[7. Gel permeation chromatography (GPC) 65](#_Toc31272684)

[**a.** **Sample preparation for GPC** 65](#_Toc31272685)

[**b.** **GPC tables** 65](#_Toc31272686)

[8. References 67](#_Toc31272687)

# **General information**

Different pulps were used in our reactivity studies; Enocell B-H-PHK-P, cotton linters (Whatman filter paper), birch B-H-K-P and eucalyptus B-H-K-P. Tetrabutylphosphonium acetate ([P4444][OAc]) was prepared to high purity, according to the literature procedure (King et al. 2018). All the reagents and solvents were high purity (≥98%) and were used as obtained from the commercial suppliers, without further purification. Acetic anhydride (AA) 98% and isopropenyl acetate (IPA) 99% were used as acetylating agents and AcNH-TEMPO was used as reagent in the selected model reactions. Products were characterized by Attenuated Total Refelction Infra-Red spectroscopy (ATR-IR) and liquid-state NMR spectroscopy on a Bruker NEO Avance (600 MHz 1H-frequency). Wide-angle X-ray scattering (WAXS) measurements were performed on a PANalytical X’Pert Pro MPD system. The diffracted intensity of Cu Ka radiation (l = 1.54 Å, under a condition of 45 kV and 40 mA) was measured in a 2θ range between 5o and 50o. Molar mass determination was performed by Gel permeation chromatography (GPC) with Agilent Infinity 1260 according to Kakko et al. (2017).

# **Pre-treatments with pure [P4444][OAc]**

## **Pre-treatment of Enocell pulp**

A pressure tube was charged with 27.03g (84.86 mmol) of [P4444][OAc] and melted at an oil-bath temperature of 80⁰C. Once the IL was liquid, 3.02 g (18.64 mmol) of Enocell pulp (10 wt% in [P4444][OAc]) was soaked into the ionic liquid. The mixture was homogenized by vortexing and heated at 120⁰C for 5 hours. The pre-treated pulp was stored in a sealed flask under argon atmosphere for further homogeneous experiments, while a portion of the pre-treated pulp was thoroughly washed with distilled water (3 times), filtered, freeze-dried and stored in a sealed flask for the heterogeneous experiments.

## **Pre-treatment of birch kraft pulp**

A pressure tube was charged with 27.11 g (85.13 mmol) of [P4444][OAc], and melted at 80⁰C. Once the IL is melted 3.01 g (18.58 mmol) of birch kraft pulp (10 wt% in [P4444][OAc]) was soaked into the melted ionic liquid. The mixture was homogenized by vortexing and heated at 120⁰C for 5 hours. The pre-treated pulp was stored in a sealed flask under argon atmosphere for further homogeneous experiments, while a portion of the pre-treated pulp was thoroughly washed with distilled water (3 times), filtered, freeze-dried and stored in a sealed flask for the heterogeneous experiments.

## **Pre-treatment of eucalyptus kraft pulp**

A pressure tube was charged with 27.06 g (84.95 mmol) of [P4444][OAc], and melted at 80⁰C. Once the IL is melted 3.06 g (18.89 mmol) of eucalyptus kraft pulp (10 wt% in [P4444][OAc]) was soaked into the melted ionic liquid. The mixture was homogenized by vortexing and heated up to 120⁰C for 5 hours. The pre-treated pulp was stored in a sealed flask under argon atmosphere for further homogeneous experiments, while a portion of the pre-treated pulp was thoroughly washed with distilled water (3 times), filtered, freeze-dried and stored in a sealed flask for the heterogeneous experiments.

# **Dissolved & regenerated pulps from [P4444][OAc]:DMSO-d6 (35:65 wt%)**

## **Enocell pulp**

A 100 ml volumetric cylinder test tube was charged with 10 ml of [P4444][OAc]:DMSO-d6 (65:35 wt%) electrolyte. 0.56g of Enocell pulp (5 wt% in [P4444][OAc]) is suspended into the electrolyte and heated up at 65oC overnight under vigorous stirring. The next morning, the clear pulp solution is regenerated into 70 ml of distilled water using an Ultraturrax high-shear mixer at 20500 rpm for 20 minutes. The white regenerated pulp was washed 3 times with distilled water and collected by centrifugation. Finally, the pulp was freeze-dried for further analysis.

## **Birch pulp**

A 100 ml volumetric cylinder test tube, is charged with 10 ml of [P4444][OAc]:DMSO-d6 (65:35 wt%) electrolyte. 0.55 g of birch pulp (5 wt% in [P4444][OAc]) is suspended into the electrolyte and heated up at 65oC overnight under vigorous stirring. The next morning, the clear pulp solution is regenerated into 70 ml of distilled water using an Ultraturrax high-shear mixer at 20500 rpm for 20 minutes. The white regenerated pulp is washed 3 times with distilled water and collected by centrifugation. Finally, the pulp is freeze-dried for crystallinity analyses.

## **Eucalyptus pulp**

A 100 ml volumetric cylinder test tube, is charged with 10 ml of [P4444][OAc]:DMSO-d6 (65:35 wt%) electrolyte. 0.55 g of eucalyptus pulp (5 wt% in [P4444][OAc]) is suspended into the electrolyte and heated up at 65oC overnight under vigorous stirring. The next morning, the clear pulp solution is regenerated into 70 ml of distilled water using an Ultraturrax high-shear mixer at 20500 rpm for 20 minutes. The white regenerated pulp is washed 3 times with distilled water and collected by centrifugation. Finally, the pulp is freeze-dried for crystallinity analyses.

# **Crystallinity index (CI) and periodic plane size determination (Scherrer equation)**

## **Amorphous standard preparation**

A 20 ml vial, equipped with an oval stirrer bar, was charged with 100.9 mg (0.62 mmol) of Enocell pulp and 2 ml of trifluoroacetic acid (TFA, 99%) and stirred for 3 hr at room temperature. 110 µL of isopropyl alcohol (~5 wt% of total weight) was added and stirred overnight at 40oC.The reaction mixture turned to a clear brownish solution. The solution was poured into a petri dish and left to dry in the fume-hood for 10 hr. Transparent cellulose film formation was observed. An excess (10 ml) of fresh Isopropyl alcohol was poured into the petri dish to wash the film. This was further evaporated in the fume hood. **Figure S1**, shows the schematic procedure described above to produce the amorphous references for the corresponding pulps.


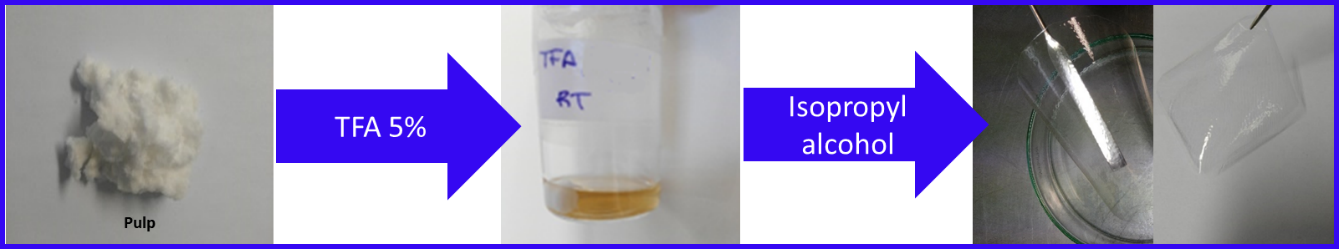


**Fig. S1** Schematic procedure to produce the amorphous reference of the corresponding cellulosic samples.

The obtained film was shown to be devoid of characteristic cellulose allomorph peaks in the WAXS diffractogram (**figure S2**) analyses. However, some degree of non-crystalline ordering is apparent, which is common with amorphous samples.


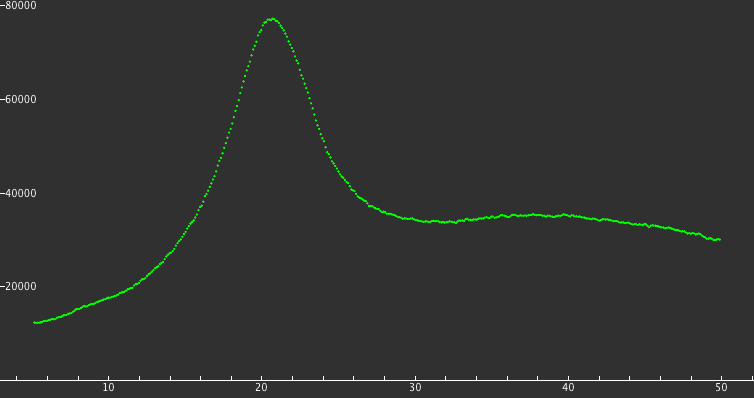


**Fig. S2** WAXS diffractogram of Enocell after TFA treatment. Diffractogram is base-line corrected. Amorphous reference for Enocell pulp.

## **Deconvolution Method**

This method consists of fitting the WAXS diffractograms with contributions representing: 1) background (glass support), 2) amorphous contribution (experimental diffractogram minus the background), 3) and peaks corresponding to the main crystalline diffraction planes obtained from the WAXS diffractograms. A suitable amorphous standard (section 3a. above) is crucial for proper analyses.A curve fitting software is required to process the data, preferably through semi-automatic fitting. We used ‘*Fityk’ 1.3.1.* (Wojdyr 2010) running on OSX 10.12.6. Commonly used functions for deconvolution of the diffraction patterns are Gaussian, Lorentzian and pseudoVoigt (mixtures of Gaussian & Lorentzian, typically 50:50). These are commonly applied to the 5 main crystalline peak regions for cellulose I: (10) at ~ 14.5 o, (110) at ~ 16.5 o, (012) at ~ 20.5 o, (200) at ~ 23.0 o & (004) at ~ 34.5 o (French 2014). In our case, we chose not to apply baseline correction but to fit the extended region from 35-50 o with 2 additional functions. PseudoVoigt functions were chosen. 70 % Lorentzian content seemed to allow for reliable fitting, without adding additional functions surrounding the main diffraction peaks. With final Levenberg-Marquardt automatic fitting, several restrictions needed to be placed on the added functions to achieve reliable results when fitting the different types of samples (untreated and treated pulps). The full procedure was as follows:

Initially the background (glass stage without sample) was deconvoluted by automatic fitting (*Fityks* Levenberg-Marquardt algorithm) of the diffractogram with 9 Gaussian functions (**figure S3**).


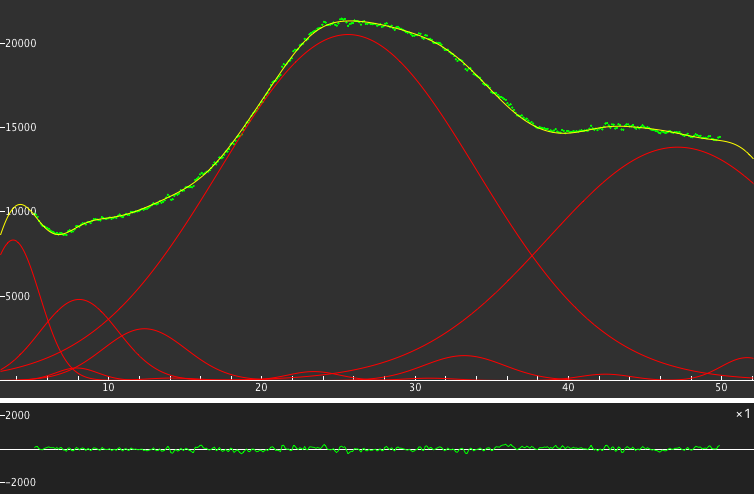


**Figure S3.** WAXS diffractogram and applied functions for the background, in Fityk: Raw data (green), fitted data (yellow), Gaussian functions (red) & Residual baseline error (green at the bottom of the figure).

This afforded a linear combination of functions (LCoF) that could be used in *Fityk* to represent the background as a single variable. It is represented here as a *Fityk* function:

‘define Background(height) = height*20529.5*exp(-0.00707221*(x-25.6165)^2) + height*13845.9*exp(-0.00693147*(x-47.125)^2) + height*8334.94*exp(-0.164937*(x-3.76)^2) + height*3070.61*exp(-0.0676902*(x-12.335)^2) + height*4809.38*exp(-0.0770164*(x-8.07)^2) + height*1475.31*exp(-0.0722442*(x-33.195)^2) + height*741.574*exp(-0.261688*(x-7.915)^2) + height*1355.87*exp(-0.173287*(x-51.655)^2) + height*528.582*exp(-0.173287*(x-23.375)^2) + height*374.68*exp(-0.173287*(x-42.415)^2) + height*137.051*exp(-0.173287*(x-30.94)^2) + height*144.09*exp(-0.173287*(x-14.14)^2)’

Next, the amorphous reference was deconvoluted by automatic fitting (*Fityks* Levenberg-Marquardt algorithm) of the diffractogram against 5 Gaussian functions and the LCoF function representing the background (**figure S4**).


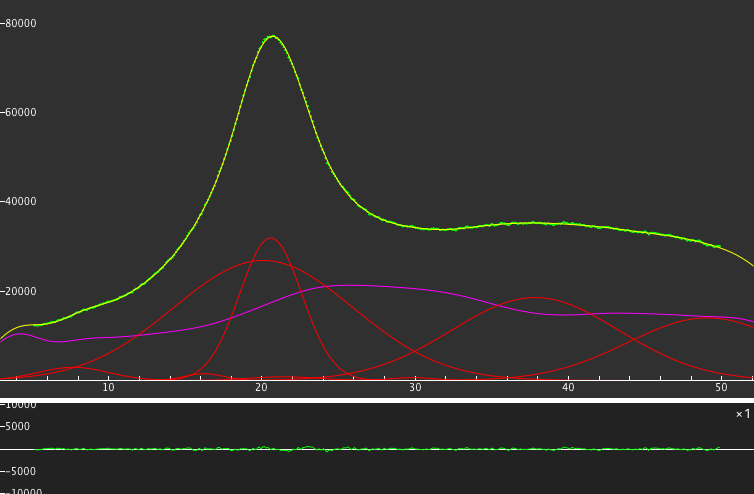


**Figure S4.** WAXS diffractogram and applied functions for the amorphous reference, in ‘Fityk’: Raw data (green), Fitted data (yellow), Gaussian functions (red), background (magenta), residual baseline error (green at the bottom of the figure).

A combined amorphous contribution LCoF function, to be used as a single variable, was created (not including the functions representing the LCoF for the background!). It is represented here as a *Fityk* function:

‘define ExpAmorphous(height) = height*820.79*exp(-0.0950819*(x-21.4263)^2) + height*14025.1*exp(-0.0183998*(x-49.0785)^2) + height*1507.09*exp(-0.304793*(x-16.2293)^2) + height*639.526*exp(-0.23783*(x-29.8167)^2) + height*2948.43*exp(-0.0930037*(x-7.68234)^2) + height*18570.7*exp(-0.0168208*(x-37.8278)^2) + height*31921*exp(-0.121094*(x-20.5685)^2) + height*26883.6*exp(-0.0145657*(x-20.0862)^2)’

The area of the LCoF was determined to be 1023481.14. When the function was applied in *Fityk,* the amorphous area could be determined by multiplying this value with the function height.

The workflow for actual sample data processing was processed as follows: **1)** The diffractogram ‘.xy’ data was opened in *Fityk*. **2)** The background function was defined and set to a height of 1, **3)** The amorphous contribution function was defined and set to a value of 0.5. **4)** 7 PseudoVoigt functions were guessed in sequence for the main peak regions and variable restrictions were applied for those peaks (**Table S1**). One important restriction was to restrict to a peak shape of 0.7 (70 % Lorentzian) for all applied peaks. This may best represent experimental and other broadening effects, such as, application of restricted peak numbers. **5)** Levenberg-Marquardt fitting was performed. **6)** Checking, modifying the variables and refitting if anything strange was noticed about the fitting.

This latter point had to be applied in a few cases due to the variability between the diffractograms. This typically meant restricting the FWHM values for certain peaks to give reasonable values, increasing degrees of freedom (FWHM or center) to allow for better fitting of certain regions or defining constraints to prevent negative values. This can be achieved by using the ‘*mpfit’* algorithm rather than *Fityks* own Levenberg-Marquardt algorithm and setting zero to infinity ‘domains’ (see *Fityk* manual) for the variables (height in this case).

**Table S1**. Fitting workflow and variables for fitting in *Fityk*.

| **Sequence** | **Workflow** | **Variables** | **Restricted Variables for fitting** | **Reasoning** |
| --- | --- | --- | --- | --- |
| guess Background | Define function,  set height to 1 to allow for reasonable guesses of the remaining peaks | height | - | Variation of sample surface level changes the relative contribution of the glass stage background |
| guess Amorphous | Define function,  set height to 0.5 to allow for reasonable guesses of the remaining peaks | height | - | A value of ~ 0.5 or less allows for enough remaining intensity over the whole diffractogram to give reasonable peak guesses |
| guess PseudoVoigt[20:30] | guess function, restrict shape to 0.7 | height, center, hwhm | shape = 0.7 | to consistently represent broadening factors |
| guess PseudoVoigt[5:10] | guess function, restrict shape to 0.7, position center over 8.5 | height, center, hwhm | shape = 0.7  center = 8.5 | to consistently represent broadening factors  to restrict the peak to that region |
| guess PseudoVoigt[10:20] | guess function, restrict shape to 0.7,  reduce hwhm to 1.35 and roughly position over (10) | height, center, hwhm | shape = 0.7 | to consistently represent broadening factors |
| guess PseudoVoigt[10:20] | guess function, restrict shape to 0.7,  reduce hwhm to 1.35 and roughly position over (110) | height, center, hwhm | shape = 0.7 | to consistently represent broadening factors |
| guess PseudoVoigt[18:23] | guess function, restrict shape to 0.7, reduce hwhm to 1.2 and position center at 20.3 | height, center | shape = 0.7,  center = 20.3 | to restrict the peak to something representative of the (012) region |
| guess PseudoVoigt[30:40] | guess function, restrict shape to 0.7, reduce hwhm to 1.2 and position center at ~ 34.5 | height, hwhm | shape = 0.7,  center = 34.5 | to restrict the peak to the  (004) region |
| guess PseudoVoigt[35:42] | guess function, restrict shape to 0.7, reduce hwhm to 3.5 and position center at ~ 38.3 | height, hwhm | shape = 0.7,  center = 38.3,  hwhm = 3.5 | to restrict the peak to the  this region (contains additional crystalline intensity) |
| guess PseudoVoigt[45:49] | guess function, restrict shape to 0.7, reduce hwhm to 4 and position center at ~ 46.7 | height, hwhm | shape = 0.7,  center = 46.7,  hwhm = 4 | to restrict the peak to the  this region (contains additional crystalline intensity) |

Additional notes: **1)** During the fitting, some variability was allowed for the peak centres in particular to allow for improvements in the fitting, as it is natural that there is some variation in the peak maxima. If major changes were observed after fitting to give unrealistic peak shapes and volumes, these variables were suitably restricted. **2)** The pre-treated samples started to become more difficult to fit and some elements of cellulose II diffraction peaks could be observed. To achieve reliable fitting of these diffractograms the number of peaks in the 14-27 o region was restricted to 2 or 3 in some cases, to prevent the automatic fitting for applying 2 peaks for the main cellulose I (200) plane. **3)** The peak at 8.5 o represents some intensity in the 7-15 o region that cannot be accounted for by background, amorphous content or intensity arising from known diffraction planes. This is likely related to experimental error or possibly presence of (10) and (110) in intensity from cellulose II hydrate (Kobayashi et al. 2011). The intensity here is most noticeable for the dissolved and water regenerated samples. However, the overall diffractogram intensity for these samples is small (Main text Fig 2c-e) owing to the lower density of these samples. Therefore, the intensity could easily be mistaken for background arising from experimental error or variability in the samples. The peak volume arising from this contribution was not included in the calculation of crystallinities.


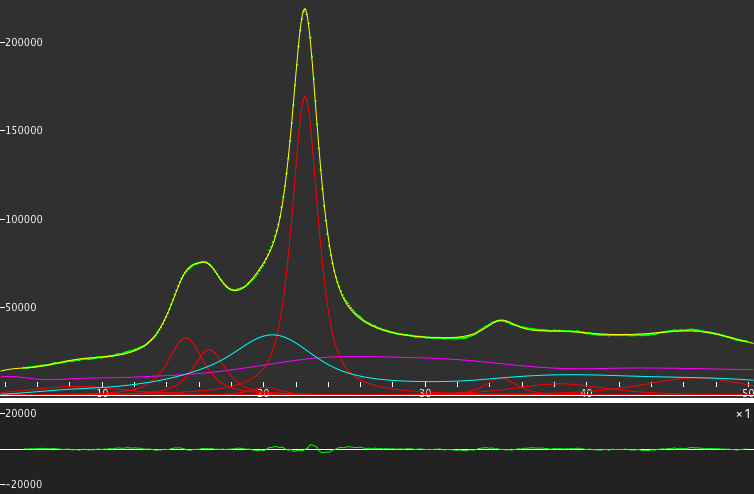


**Fig. S5** Deconvolution of WAXS diffractograms for the untreated Enocell sample in Fityk. Data & functions: raw data (green), fitted data (yellow), amorphous function (cyan), background (magenta), crystalline functions (red) and residual baseline error (green at the bottom of the figure).


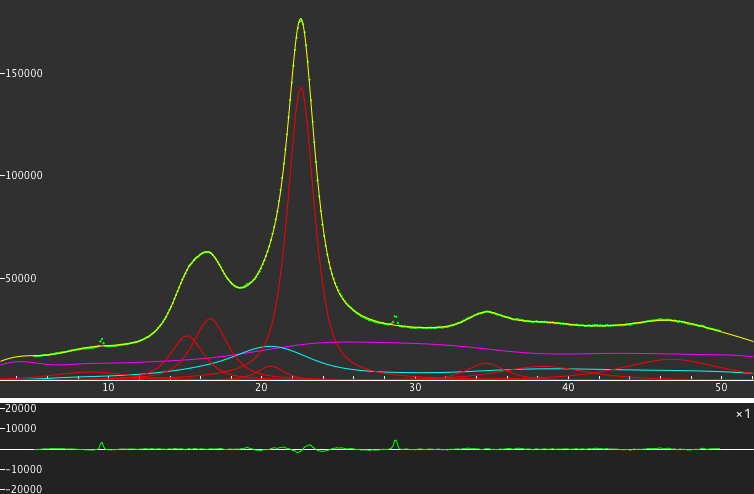


**Fig. S6** Deconvolution of WAXS diffractograms for the untreated birch sample in Fityk. Data & functions: raw data (green), fitted data (yellow), amorphous function (cyan), background (magenta), crystalline functions (red) and residual baseline error (green at the bottom of the figure).


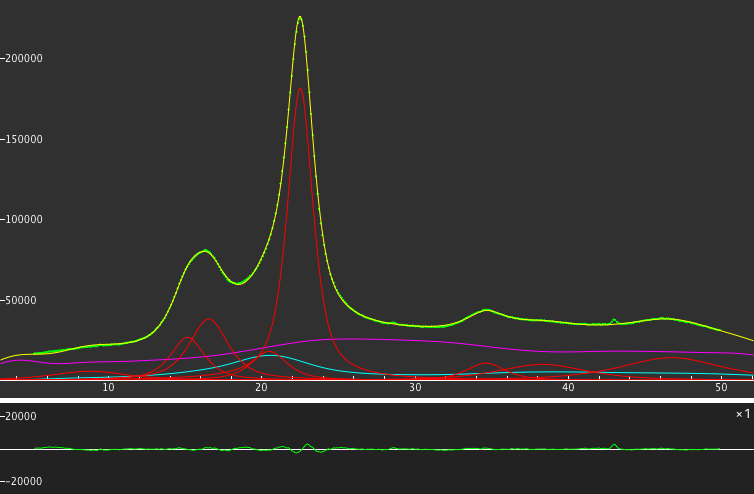


**Fig. S7** Deconvolution of WAXS diffractograms for the untreated eucalyptus sample in Fityk. Data & functions: raw data (green), fitted data (yellow), amorphous function (cyan), background (magenta), crystalline functions (red) and residual baseline error (green at the bottom of the figure).


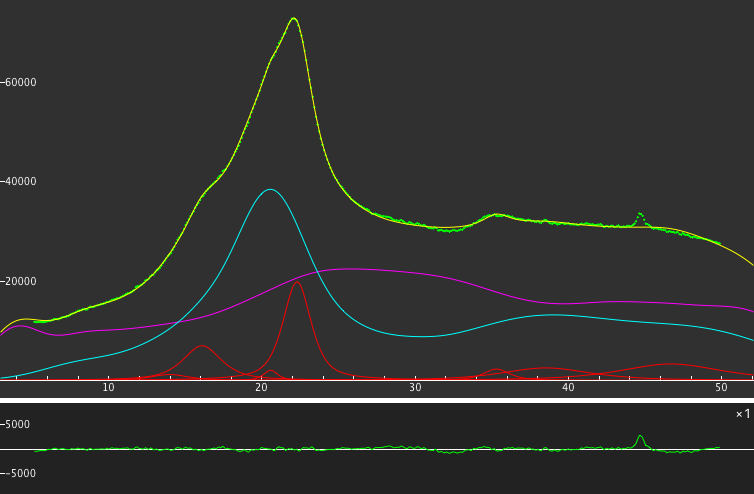


**Fig. S8** Deconvolution of WAXS diffractograms for the pre-treated (non-dissolving) Enocell sample in Fityk. Data & functions: raw data (green), fitted data (yellow), amorphous function (cyan), background (magenta), crystalline functions (red) and residual baseline error (green at the bottom of the figure).


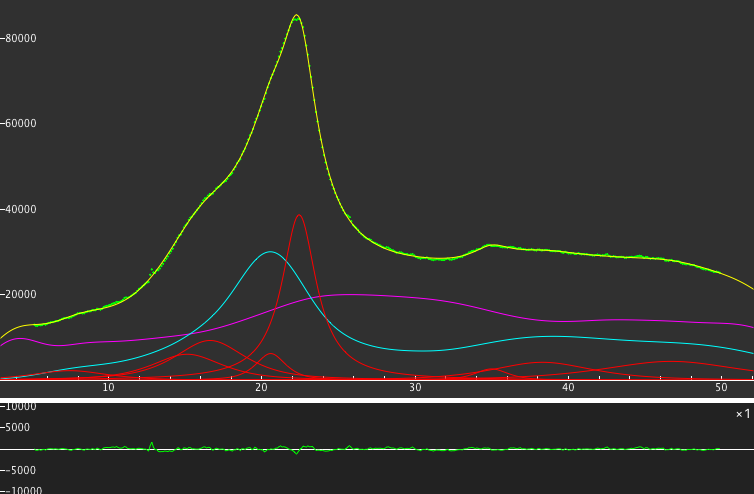


**Fig. S9** Deconvolution of WAXS diffractograms for the pre-treated (non-dissolving) birch sample in Fityk. Data & functions: raw data (green), fitted data (yellow), amorphous function (cyan), background (magenta), crystalline functions (red) and residual baseline error (green at the bottom of the figure).


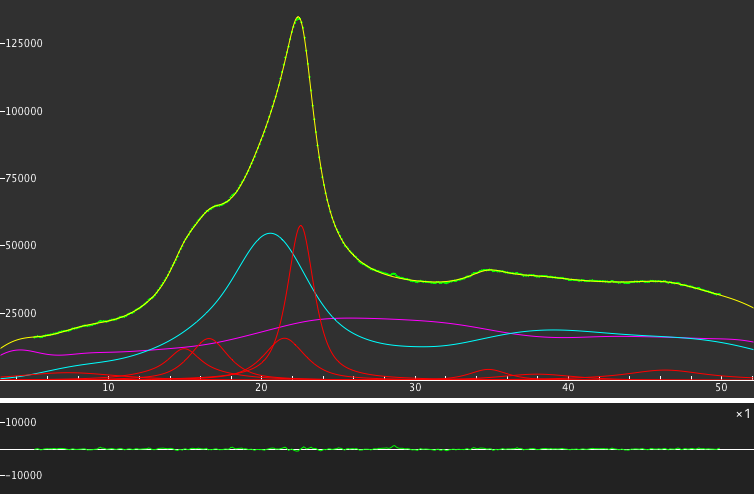


**Fig. S10** Deconvolution of WAXS diffractograms for the pre-treated (non-dissolving) eucalyptus sample in Fityk. Data & functions: raw data (green), fitted data (yellow), amorphous function (cyan), background (magenta), crystalline functions (red) and residual baseline error (green at the bottom of the figure).


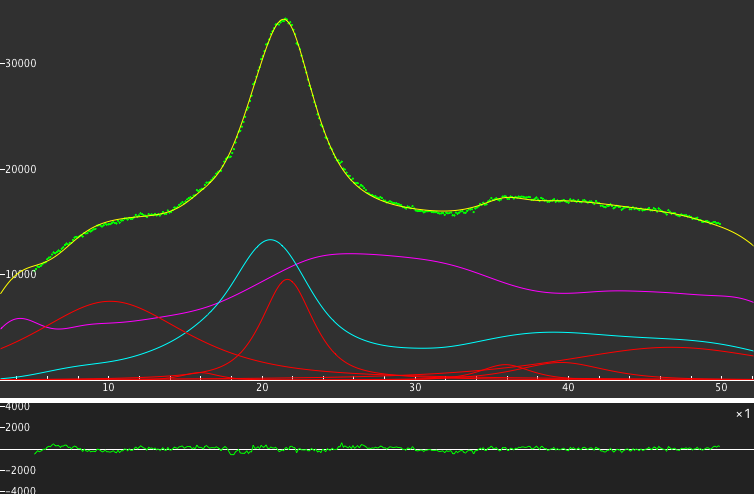


**Fig. S11** Deconvolution of WAXS diffractograms for the pre-treated (dissolving) Enocell sample in Fityk. Data & functions: raw data (green), fitted data (yellow), amorphous function (cyan), background (magenta), crystalline functions (red) and residual baseline error (green at the bottom of the figure).


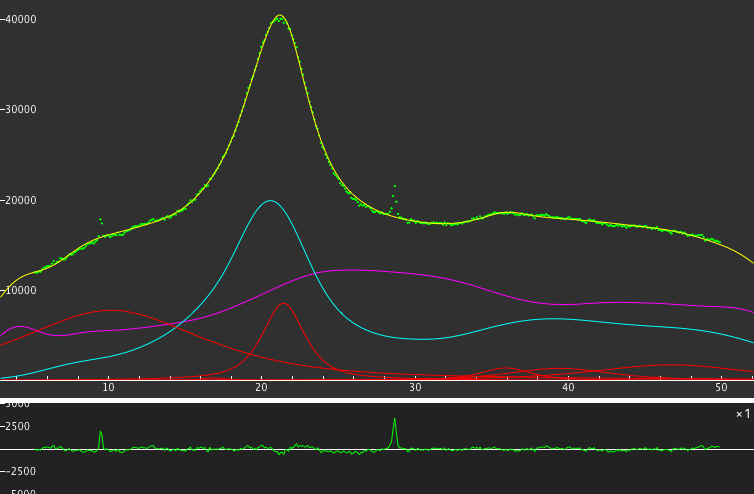


**Fig. S12** Deconvolution of WAXS diffractograms for the pre-treated (dissolving) birch sample in Fityk. Data & functions: raw data (green), fitted data (yellow), amorphous function (cyan), background (magenta), crystalline functions (red) and residual baseline error (green at the bottom of the figure).


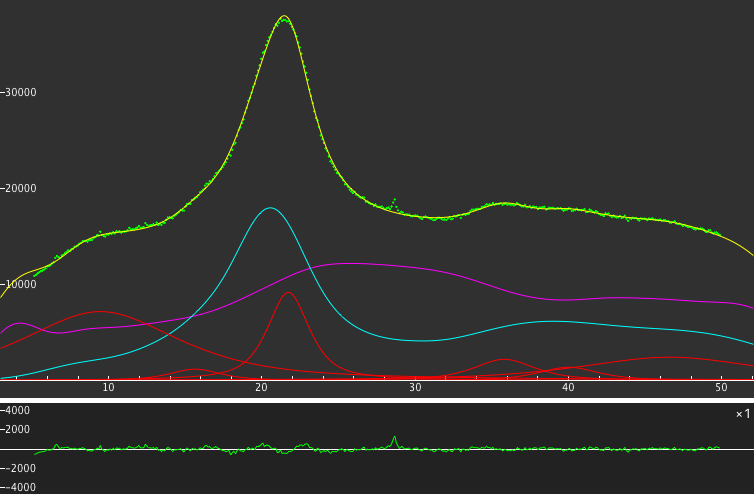


**Fig. S13** Deconvolution of WAXS diffractograms for the pre-treated (dissolving) eucalpytus sample in Fityk. Data & functions: raw data (green), fitted data (yellow), amorphous function (cyan), background (magenta), crystalline functions (red) and residual baseline error (green at the bottom of the figure).


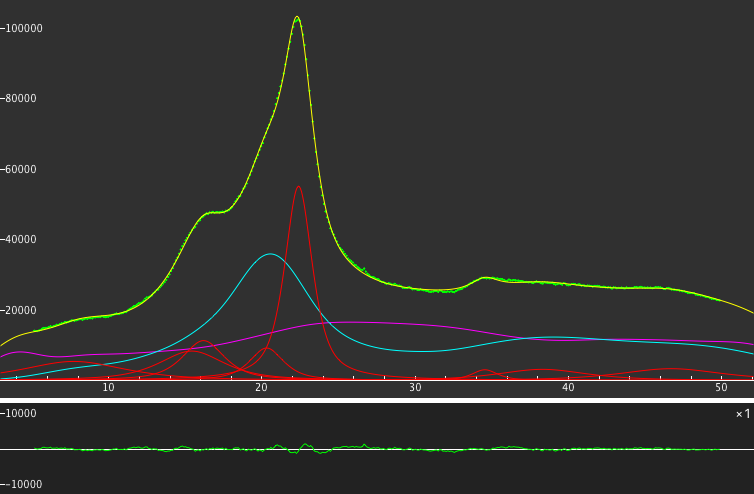


**Fig. S14** Deconvolution of WAXS diffractogram for the pre-treated (non-dissolving) Enocell sample (1st cycle) in the recycling trials, using Fityk. Data & functions: raw data (green), fitted data (yellow), amorphous function (cyan), background (magenta), crystalline functions (red) and residual baseline error (green at the bottom of the figure).


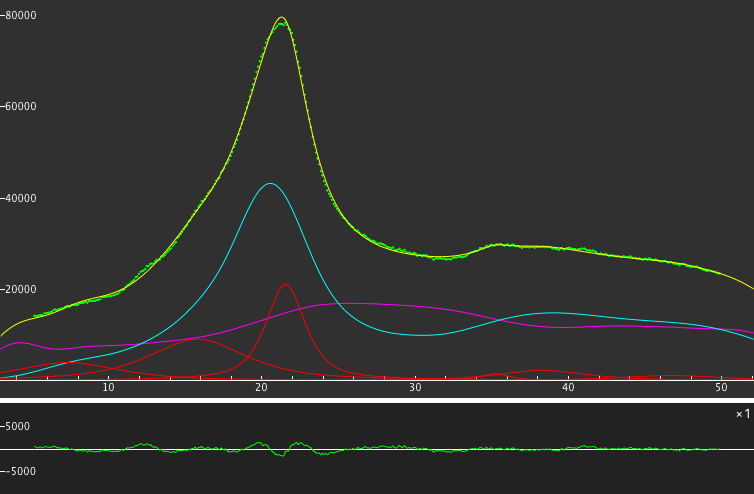


**Fig. S15** Deconvolution of WAXS diffractogram for the pre-treated (non-dissolving) Enocell sample (2nd cycle) in the recycling trials, using Fityk. Data & functions: raw data (green), fitted data (yellow), amorphous function (cyan), background (magenta), crystalline functions (red) and residual baseline error (green at the bottom of the figure).

The corresponding crystallinity index (CI) values, shown in **figure 3** of main text, were calculated according to [**Eq.(1)**].

(**1**)

## **Periodic Plane Determination using the Scherrer Equation**

Rough periodic plane sizes were calculated using the Scherrer equation [**Eq.(2)**]:

(**2**)

which is commonly used for determining the dimension (L, nm) of cellulose crystallites, where  is the full width half maximum (FWHM) for particular periodic plane, K (the Scherrer constant) is 0.94 for spherical crystallites with cubic symmetry.** is the X-ray wavelength (1.54178 Å in our case for Cu K**) and *θ* is 2*θ* / 2 (in radians). The FWHM values were determined from the Gaussian functions, in *Fityk*. The results are given in the main text. The crystallite sizes for the (200) plane for each sample were calculated (**Table S2**).

**Table S2**. Crystallite sizes calculated for the pulps, using the FWHM values for the (200) planes.

| **Sample** | **(200) FWHM**  **(o)** | **(200)**  **Crystallite Size (nm)** | **(10 & 110) Average FWHM (o)** | **(10 & 110) Average Crystallite Size (nm)** | **CI (%)** |
| --- | --- | --- | --- | --- | --- |
| Untreated Enocell | 1.95 | 4.35 | 2.51 | 3.34 | 60.6 |
| Untreated Birch | 2.08 | 4.06 | 2.67 | 3.14 | 75.1 |
| Untreated Eucalpytus | 2.00 | 4.23 | 2.91 | 2.88 | 81.2 |
| PT-ND Enocell | 2.19 | 3.86 | - | - | 20.3 |
| PT-ND Birch | 2.69 | 3.14 | - | - | 29.9 |
| PT-ND Eucalputus | 2.10 | 4.03 | - | - | 32.5 |
| PT-D Enocell | 4.05 | 2.09 | - | - | 41.4 |
| PT-D Birch | 3.32 | 2.55 | - | - | 21.6 |
| PT-D Eucalputus | 3.26 | 2.60 | - | - | 28.2 |

# **Acetylation as first model reaction**

## **Preparation of standard samples for DS determination through diffusion-edited 1H experiments**

Three acetylated Enocell pulp samples of different DS values were prepared to allow for correlation of the standard 1H and diffusion-edited 1H integral ratios. As mentioned in the main text, it was necessary to use the diffusion-edited 1H experiments (in [P4444][OAc]:DMSO-d6 electrolyte) to determine DS values only for the lower DS samples, as they were not fully soluble in DMSO-d6.

### Sample 1: DS value < 1

A 50 ml round bottomed flask (RBF) equipped with a stirrer bar and glass stopper was charged with 0.51 g (3.15 mmol, 1 Eq.) of Enocell pulp and dissolved at room temperature in 10 g of [P4444][OAc]:DMSO-d6 (20:80 wt.%) electrolyte solution for 1hr. 0.30 ml (3.18 mmol, 1 Eq.) of acetic anhydride and 0.38 ml (4.77 mmol, 1.5 Eq, referred to acetic anhydride amount) of pyridine were then added. The reaction mixture was stirred at 50oC overnight. The reaction product was thoroughly washed with distilled water and the precipitated white product was collected by centrifugation. The product was freeze-dried and stored in a sealed vial for further analysis. **DS=0.70**

### Sample 2: 1 > DS value < 1.5

A 50 ml RBF equipped with a stirrer bar and glass stopper was charged with 0.51 g (3.15 mmol, 1 Eq.) of Enocell pulp and dissolved at room temperature in 10 g of [P4444][OAc]:DMSO-d6 (20:80 wt.%) electrolyte solution for 1 hr. 0.60 ml (6.34 mmol, 2 Eq.) of acetic anhydride and 0.76 ml (9.51 mmol, 1.5 Eq, referred to acetic anhydride amount) of pyridine were then added. The reaction mixture was stirred at 50oC overnight. The reaction product was thoroughly washed with distilled water and the precipitated white product was collected by centrifugation. The product was freeze-dried and stored in a sealed vial. **DS=1.30**

### Sample 3: 1.5 > DS value < 2

A 50 ml RBF equipped with a stirrer bar and glass stopper was charged with 0.50 g (3.08 mmol, 1 Eq.) of Enocell pulp and dissolved at room temperature in 10 g of [P4444][OAc]:DMSO-d6 (20:80 wt.%) electrolyte solution for 1 hr. 0.90 ml (9.33 mmol, 3 Eq.) of acetic anhydride and 1.13 ml (13.99 mmol, 1.5 Eq, referred to acetic anhydride amount) of pyridine were then added. The reaction mixture was stirred at 50oC overnight. The reaction product was thoroughly washed with distilled water and the precipitated white product was collected by centrifugation. The product was freeze-dried and stored in a sealed vial. **DS=1.92**

## **Acetylation of untreated pulps**

A 50 ml RBF equipped with a stirrer bar and a reflux condenser was charged with 0.11 g (0.648 mmoles) of the untreated pulps (Enocell, birch or eucalyptus) and 10 ml of the acetylating agent (AA or IPA). The reaction mixture was stirred overnight at 165oC. The reaction mixture was thoroughly mixed with distilled water (3 washes of 45 ml each) and the precipitated product was collected by centrifugation. The product was freeze-dried and stored in a sealed vial for further analysis.

## **Acetylation of IL pre-treated pulps**

### Homogeneous route

A 50 ml RBF equipped with a stirrer bar and a reflux condenser was charged with 0.1085 g (0.670 mmoles) of the IL pre-treated pulps (Enocell, birch or eucalyptus), which still contained the IL after the pre-treatment. 10 ml of the acetylating agent (AA or IPA) was also added and the reaction mixture was stirred overnight at 165℃. The reaction mixture was thoroughly washed with distilled water (3 washes of 45 ml each) and the precipitated product was collected by centrifugation. The product was freeze-dried and stored in a sealed vial for further analysis.

### Heterogeneous route

A 50 ml RBF equipped with a stirrer bar and a reflux condenser was charged with 0.1074 g (0.663 mmoles) of the IL pre-treated pulps (Enocell, birch or eucalyptus), where the IL was washed out after the pre-treatment. 10 ml of the acetylating agent (AA or IPA) was also added and the reaction mixture was stirred overnight at 165℃. The reaction mixture was thoroughly washed with distilled water (3 washes of 45 ml each) and the precipitated product was collected by centrifugation. The product was freeze-dried and stored in a sealed vial for further analysis.

## **NMR analyses**

### NMR experimental

***NMR sample preparation for analysis in [P4444][OAc]:DMSO-d6.***To prepare the samples for NMR analysis, typically 50 mg of dried sample is added to a sealable sample vial and made up to 1 g, by addition of stock [P4444][OAc]:DMSO-d6 (20:80 wt%) electrolyte solution (King et al. 2018). The samples were magnetically stirred at RT until they go clear. This typically was over a 1 hr period. If the samples did not go clear during that period, the temperature was typically increased to 60 oC. All further NMR experiments were recorded on a Bruker AVANCE *NEO* 600 MHz spectrometer equipped with a 5 mm SmartProbeTM.

***Diffusion-edited 1H NMR experiments.*** The diffusion-edited 1H experiment used a 1D bipolar-pulse pair with stimulated echo (BPPSTE) (Wu et al. 1995)diffusion-ordered spectroscopy (DOSY) pulse sequence (ledbpgp2s1d), with 1 s pre-pulse delay (d1), 0.5 s acquisition time (aq), 16 dummy scans (ds) and 512 transient scans (ns), a sweep-width (sw) of 20 ppm with the transmitter offset on 6.1 ppm (o1p), a diffusion time (d20) of 200 ms, a gradient recovery delay (d16) of 0.2 ms, an eddy current delay (d21) of 5 ms, a gradient pulse (p30) of 2.5 ms and a z-gradient strength (gpz6) of 90% at ≥ 50 G/cm (probe manual z-gradient strength). These conditions are specific to the Bruker AVANCE *NEO* 600 MHz - SmartProbeTM system. Diffusion-edited 1H spectra for the different DS value acetylated Enocell samples are shown in **Figure S16**.

***Multiplicity-edited HSQC experiments.*** The HSQC experiment used a multiplicity-edited phase sensitive HSQC sequence with echo/antiecho-TPPI gradient selection (hsqcedetgp) (Willker et al. 1993). Sweep-widths (sw) were 13.03 and 165 ppm, with transmitter offsets (o1p) of 6.18 and 75 ppm, respectively. There were 512 transients (td) in the indirect (f1) dimension. There were 16 dummy scans (ds), 8 transient scans (ns), an acquisition time (aq) of 0.065 s for f2 and a pre-relaxation delay of 1.5 s.

***HSQC-TOCSY experiments.*** The HSQC-TOCSY experiment used a phase sensitive HSQC-TOCSY pulse program with the DIPSI-2 isotropic mixing sequence and echo/antiecho-TPPI gradient selection (hsqcdietgpsisp.2) (Willker et al. 1993).Sweep-widths (sw) were 16.03 and 165 ppm, with transmitter offsets (o1p) of 4.70 and 75 ppm, respectively. There were 512 transients (td) in the indirect (f1) dimension. There were 32 dummy scans (ds), 16 transient scans (ns), an acquisition time (aq) of 0.107 s for f2 and a pre-relaxation delay of 1.5 s. The TOCSY mixing delay (d9) was 0.015 s for the short-range (COSY-like) TOCSY experiment and 0.120 for the long-range (showing the full spin-system) experiment. The short-range HSQC-TOCSY, used to assign the different peaks in the different spin systems, for Enocell-IL -W-AA, is shown in **Figure S17**.


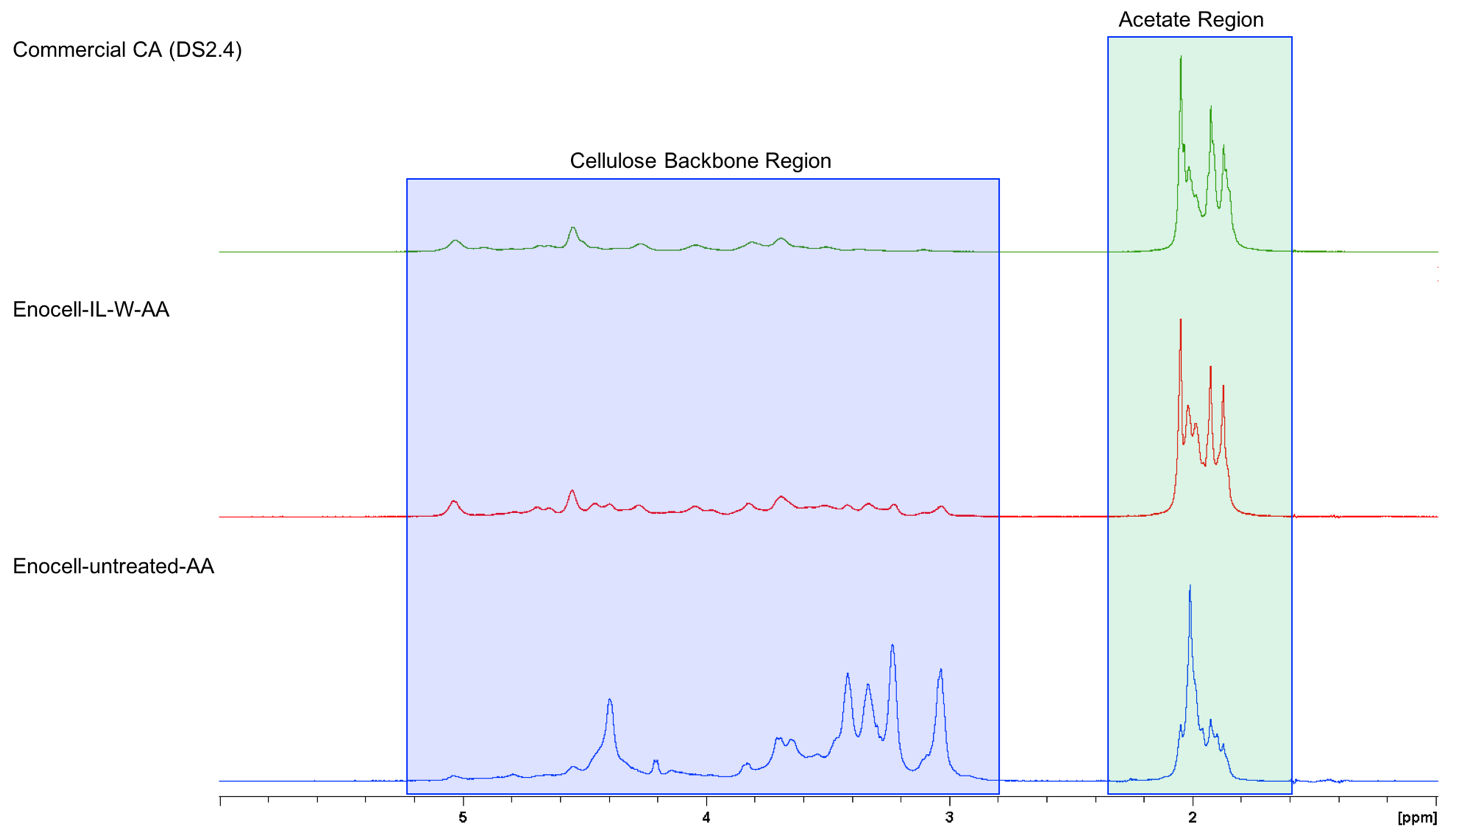


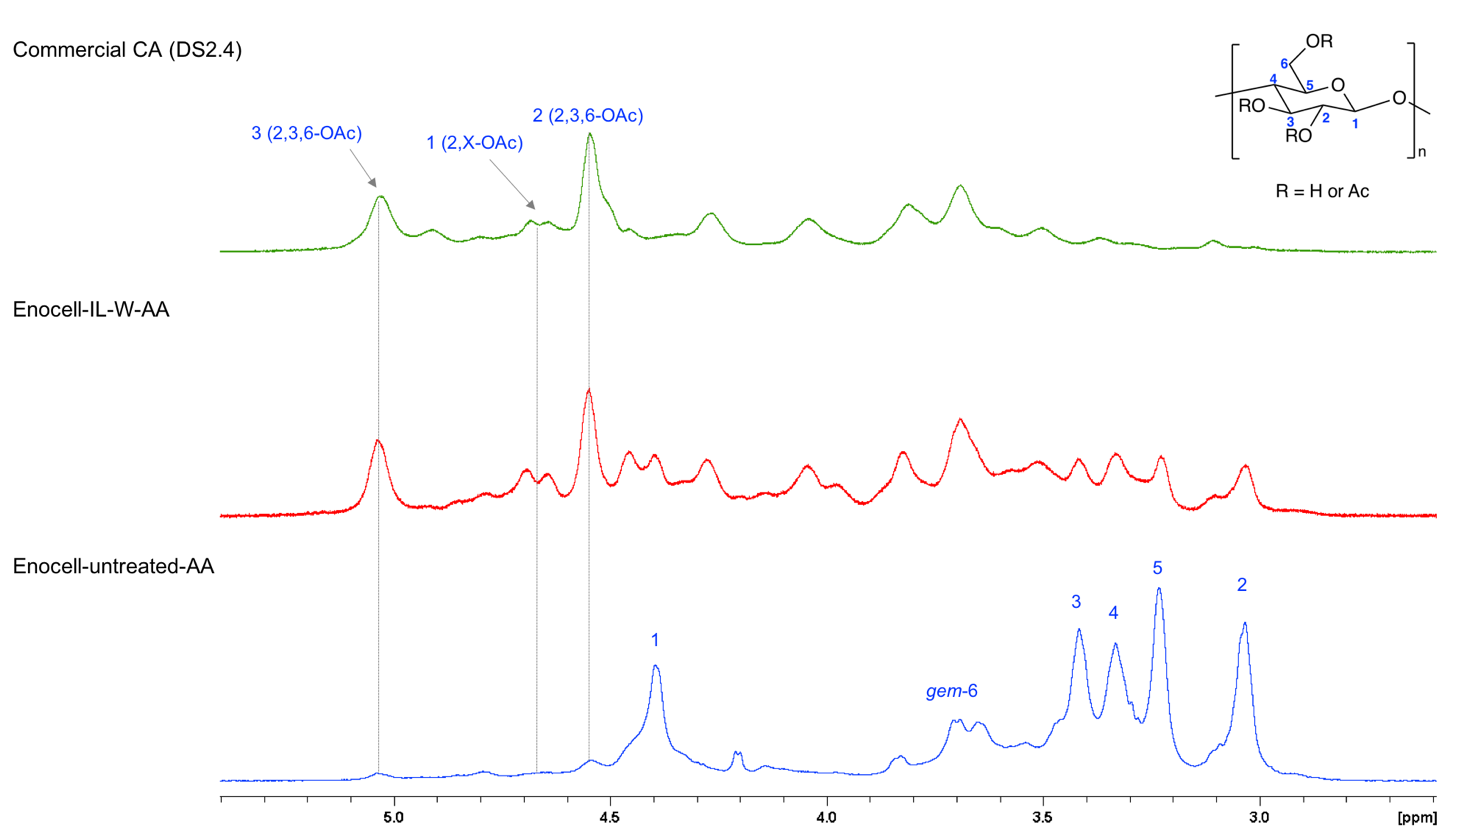


**Fig. S16** Diffusion-edited 1H spectra for different DS acetylated Enocell samples: full spectrum (top), H2-H6 region (bottom).


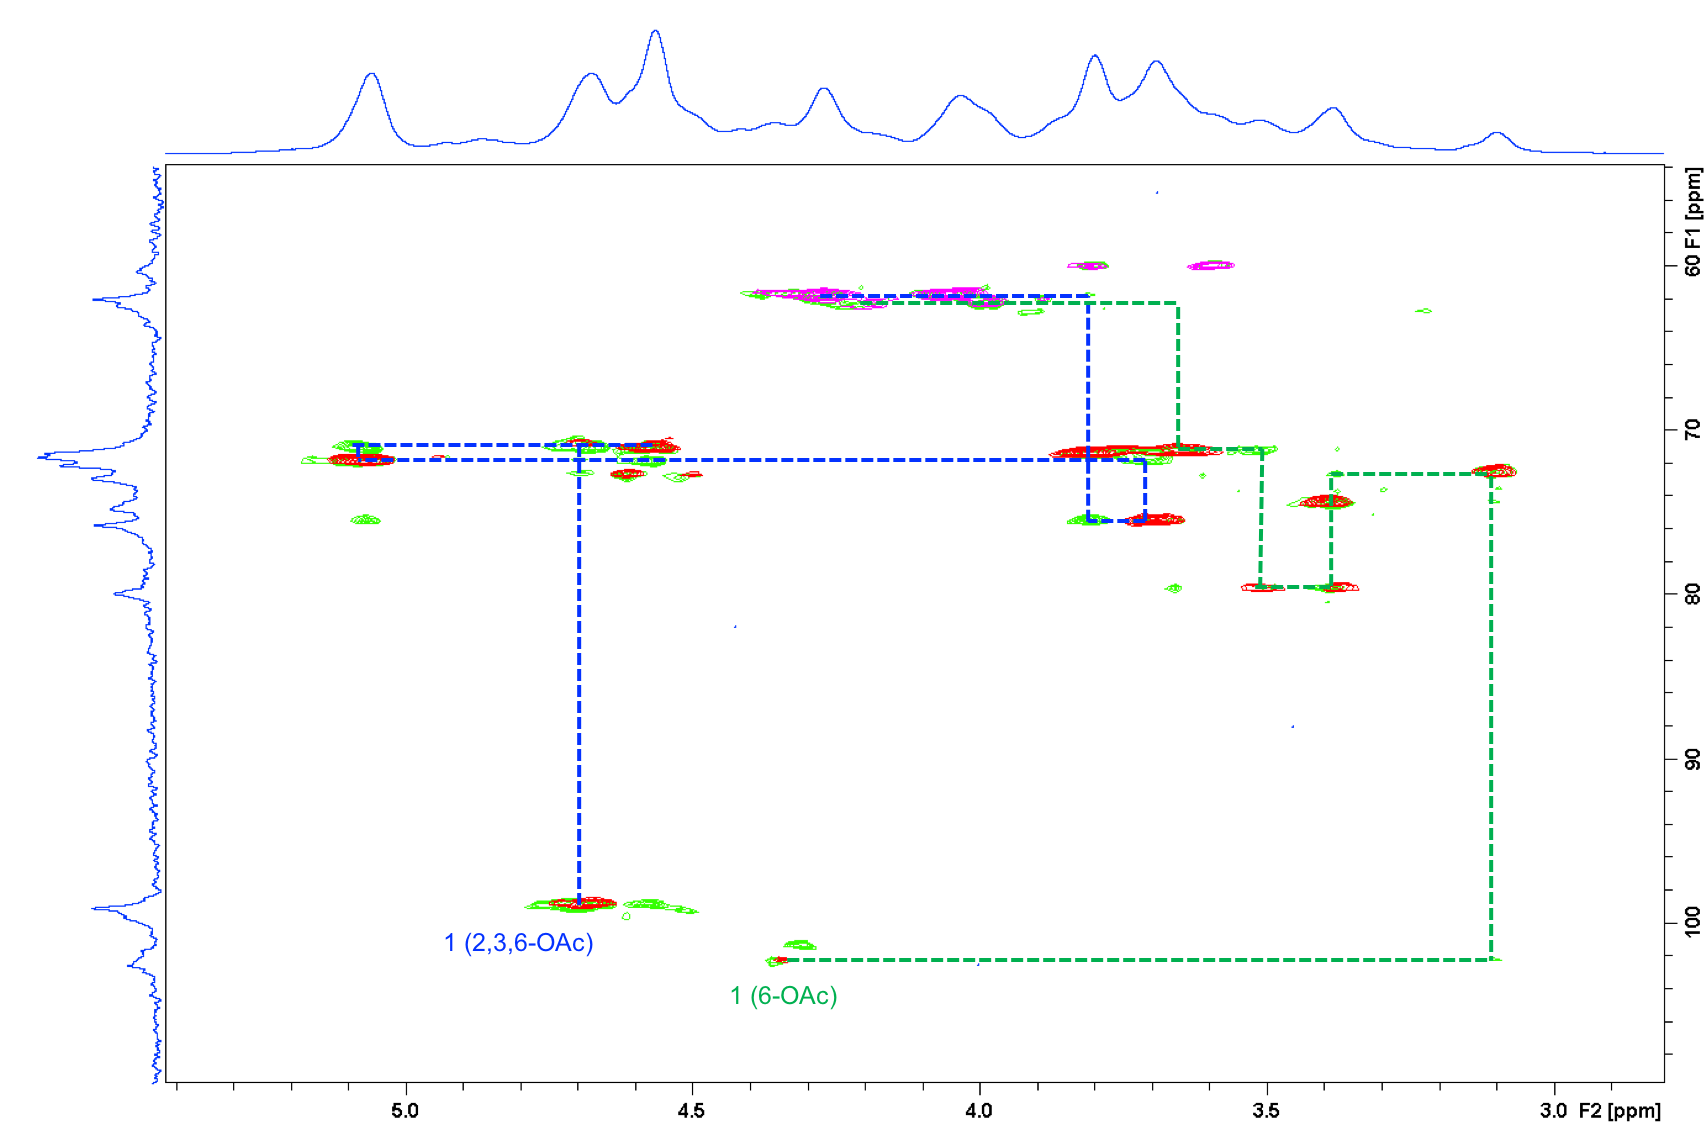


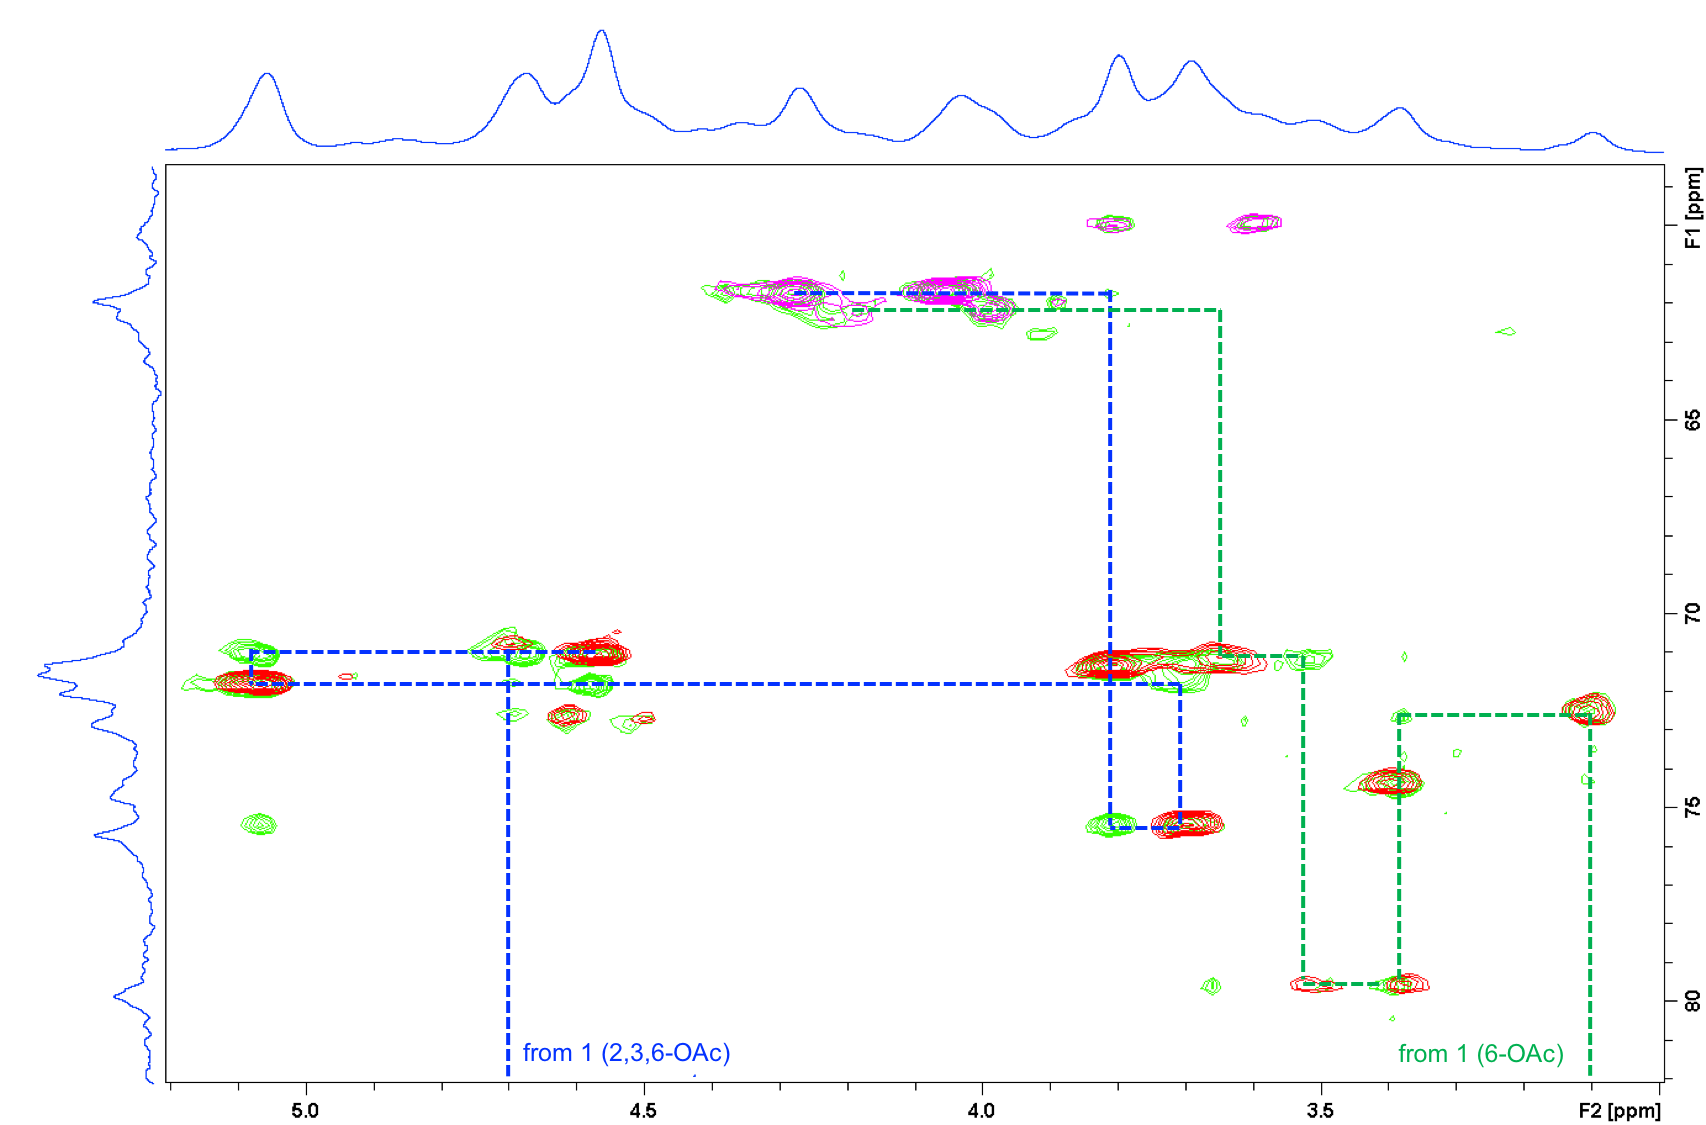


**Fig. S17** HSQC-TOCSY (short-range, 15 ms mixing time) for Enocell- IL-W-AA: full spectrum (top), CH2-CH6 (bottom). HSQC spectrum is overlaid.

### DS determination from 1H NMR

High DS samples (from homogeneous experiments) were soluble directly in DMSO-d6 and analysed by 1H NMR yielding integral values for rough DS determination. However, low DS samples (from heterogeneous experiments) were not fully soluble. The non-soluble samples, were solubilised in [P4444][OAc]/DMSO-d6 electrolyte1 and analysed by using diffusion-edited 1H experiments, to eliminate the [P4444][OAc] signals from the spectra. DS values of soluble samples were calculated directly from 1H NMR by the integration method, according to equation **[Eq.(3)]**.

(**3**)

Where, IA is the acetate signal integral value (~ 1.75-2.2 ppm) and IC is the cellulose backbone signal integral value (~ 2.8-5.6 ppm) from the 1H NMR spectra. Acetate and cellulose back bone signals are divided by the number of protons they have, 3 and 7 respectively. The water peak was excluded from IC and cellulose hydroxyls were not considered as they typically fall downfield of 5.6 ppm, if present at all (exchanging with the H2O). In addition, diffusion-editing almost completely eliminates these signals due to rapid proton exchange between H2O and cellulose OHs.

The diffusion-edited 1H NMR experiments tends to overestimate IA because the different types of nuclei have quite different relaxation rates (T1 and T2). This allows for a disproportionate loss of signal for IC relative to IA during the pulse sequence, before the acquisition period. Therefore, a correction factor (CFdiff) must be applied while maintaining the same analysis conditions (most importantly the sample concentration & probe temperature) for the diffusion-edited experiments.

Therefore, CFdiff values using standard acetylated cellulose samples (homogeneously acetylated Enocell pulp, see section 4a of this supporting information) of known DS were needed for accurate calculation of the DS values from the diffusion-edited experiments. The samples had to be homogeneously acetylated as they needed to be soluble in both the electrolyte and DMSO-d6 to yield DS values from both solvents/methods.

An average of the 3 CFdiff values (for 3 different DS values) was applied for estimation of the DS values directly from the diffusion-edited degrees of substitution (DSdiff).

(**4**)

DS could then be determined from the product of the average CFdiff and DSdiff. CFdiff values from the Enocell pulp reference samples and DS of acetylated products of our studies are shown in **Table S3.** The final data is shown in the main text **Table 2**.

**Table S3.** Determination of the correction factor to be applied to the DS from DOSY NMR experiments, obtained from Enocell pulp standard samples of known DS.

| Experiment | Standard samples | IC[a] | OS IC[b] | IA[c] | (IC-OS IC)/7[d] | IA/3[e] | DS[f] | DSdiff | CFdiff |
| --- | --- | --- | --- | --- | --- | --- | --- | --- | --- |
| 1H NMR | Sample 1 | 3.68 | 0.35 | 1.00 | 0.48 | 0.33 | 0.700 |  |  |
| Sample 2 | 1.90 | 0.10 | 1.00 | 0.26 | 0.33 | 1.30 |  |  |
| Sample 3 | 1.27 | 0.05 | 1.00 | 0.17 | 0.33 | 1.92 |  |  |
| Diffusion-edited  1H NMR | Sample 1 | 1.53 |  | 1.00 | 0.22 | 0.33 |  | 1.52 | 0.46 |
| Sample 2 | 0.79 |  | 1.00 | 0.11 | 0.33 |  | 2.94 | 0.44 |
| Sample 3 | 0.74 |  | 1.00 | 0.11 | 0.33 |  | 3.16 | 0.61 |
|  |  |  |  |  | Average of correction factor | | | | 0.50 |

[a] IC: Integral value for cellulose backbone. [b] OS IC: Integral value of overlapping NMR signal with cellulose backbone (corresponding to H2O in DMSO-d6). [c] IA: Integral value for acetate NMR signal. [d] (IC-OS IC)/7: Subtraction of overlapping NMR signal with cellulose backbone, divided by total number of protons in cellulose backbone. [e] IA/3: Integral value for acetate NMR signal divided by total number of protons in the acetate. [f] DS: Degree of substitution. The degree of substitution obtained from 1H NMR experiment is accurate, while the degree of substitution from diffusion-edited NMR experiments is overestimated. From the ratio of these values we obtained the correction factors to be applied to the diffusion-edited data (low DS samples in table S8). Integral values can be found in figures S21-S32 below.

### Xylan content determination

Anhydroxylose unit (AXU) vs anhydroglucose unit (AGU) contents were determined by deconvolution of the quantitative 1H NMR spectra in *Fityk*: **1)** standard 1H spectra were collected (d1 = 10 for quantitative conditions, ns = 16), **2)** The spectra were calibrated and phased in Brukers TopSpin 4.0.6, **3)** The xy data was outputted as ‘.csv’ format using MestReNova 10.0.2, **4)** the spectra were spline baseline corrected in *Fityk* with critical points at 4.08, 4.10, 4.85 & 4.95 ppm, **5)** At least 2 Gaussian functions were applied representing the separate AXU H1 peak (4.22 ppm) and the AGU H1 peak (4.40 ppm). The xylan content was calculated as the percentage of the total Gaussian area corresponding to the AXU H1 peaks. The spline corrections and deconvoluted data are shown in **Fig S18-S20**.

**
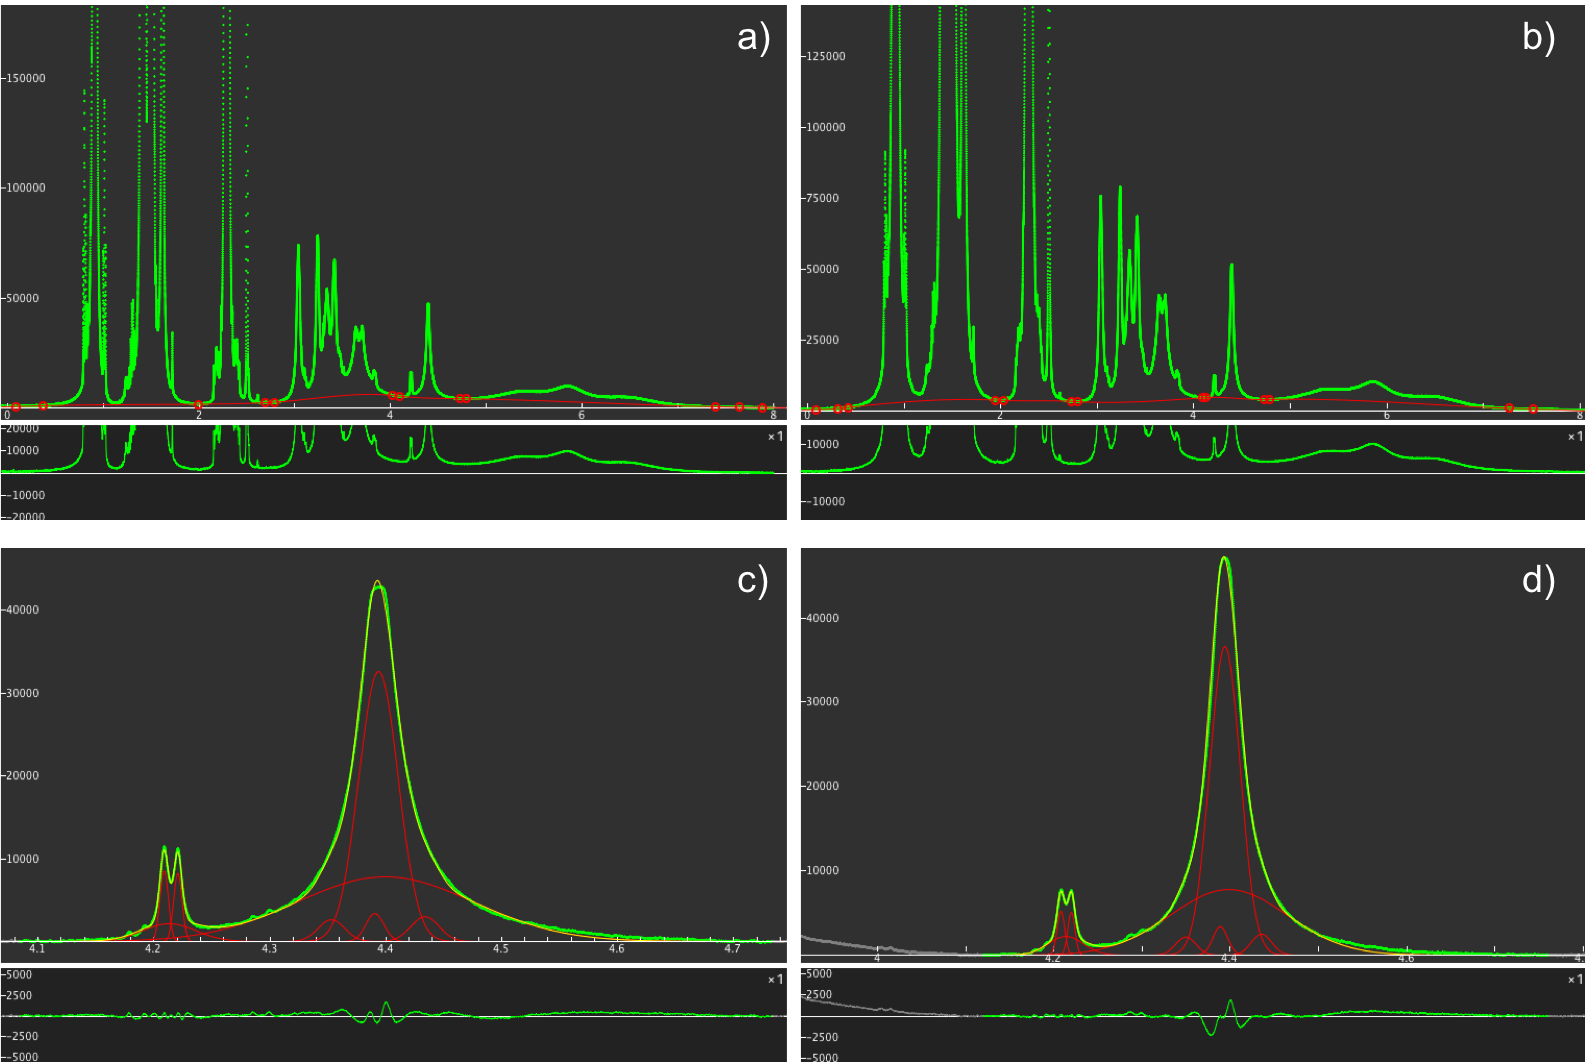
**

**Fig. S18**Spline baseline correction for a) untreated (non-dissolving) Enocell and b) pre-treated (non-dissolving) Enocell, followed by Gaussian deconvolution of the AXU and AGU peaks for c) untreated (non-dissolving) Enocell and d) pre-treated (non-dissolving) Enocell.

**
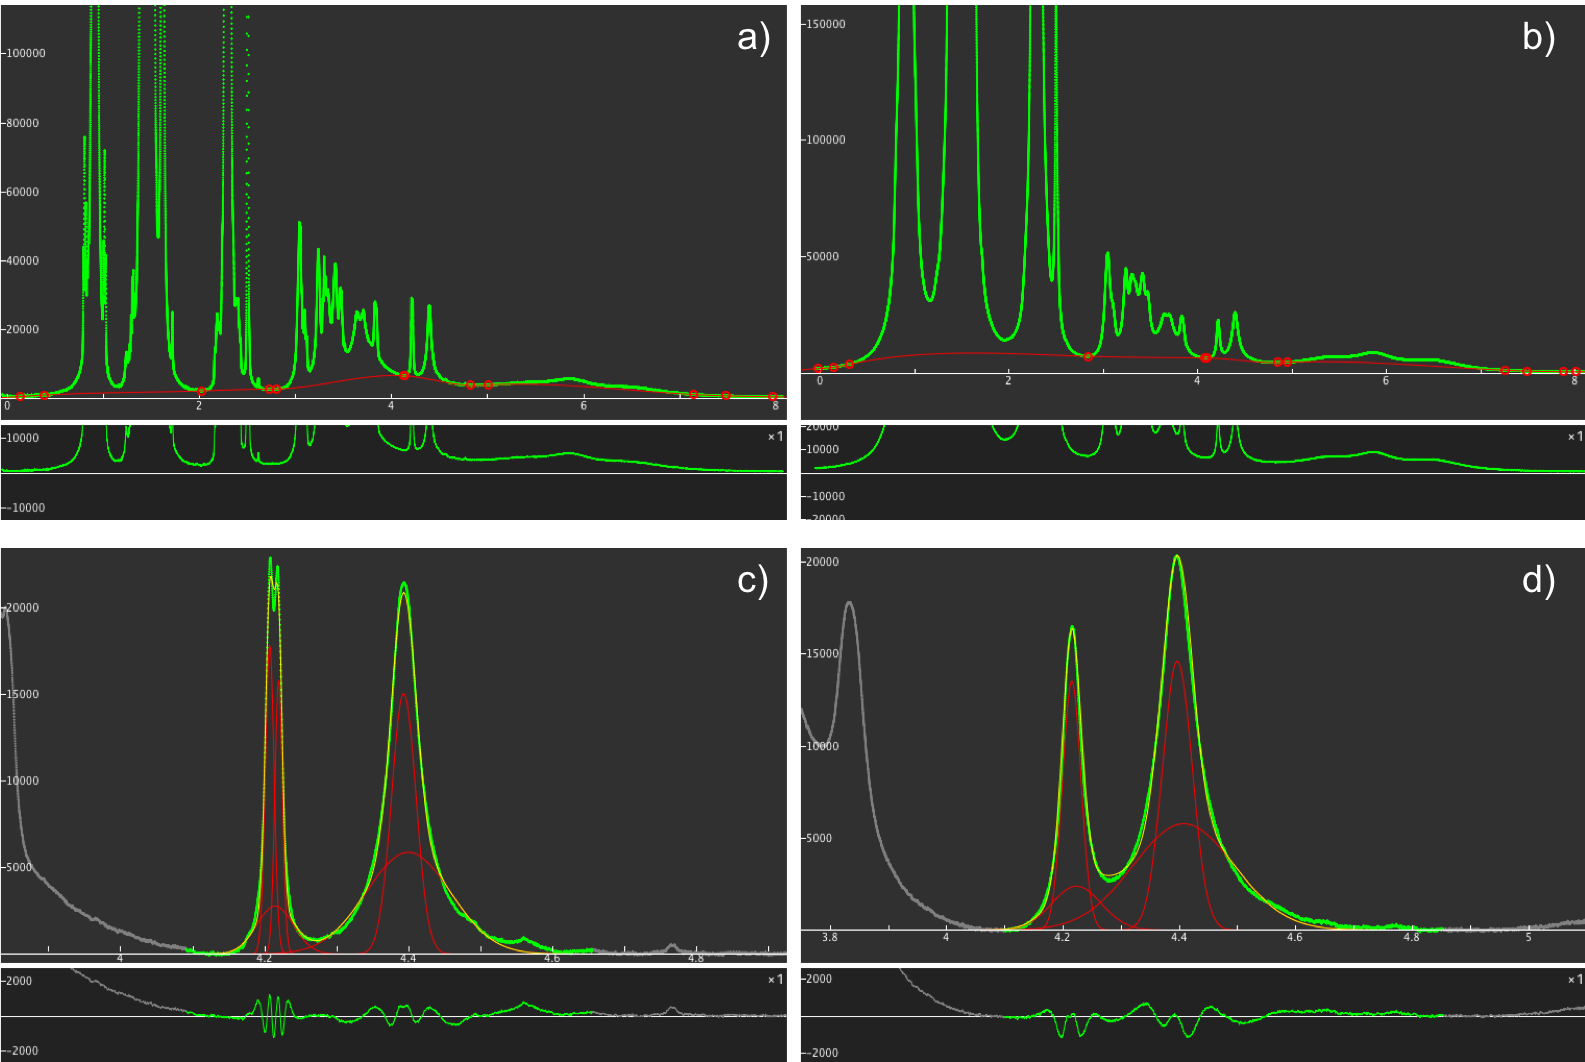
**

**Fig. S19** Spline baseline correction for a) untreated (non-dissolving) Birch and b) pre-treated (non-dissolving) Birch, followed by Gaussian deconvolution of the AXU and AGU peaks for c) untreated (non-dissolving) Birch and d) pre-treated (non-dissolving) Birch*.*

**
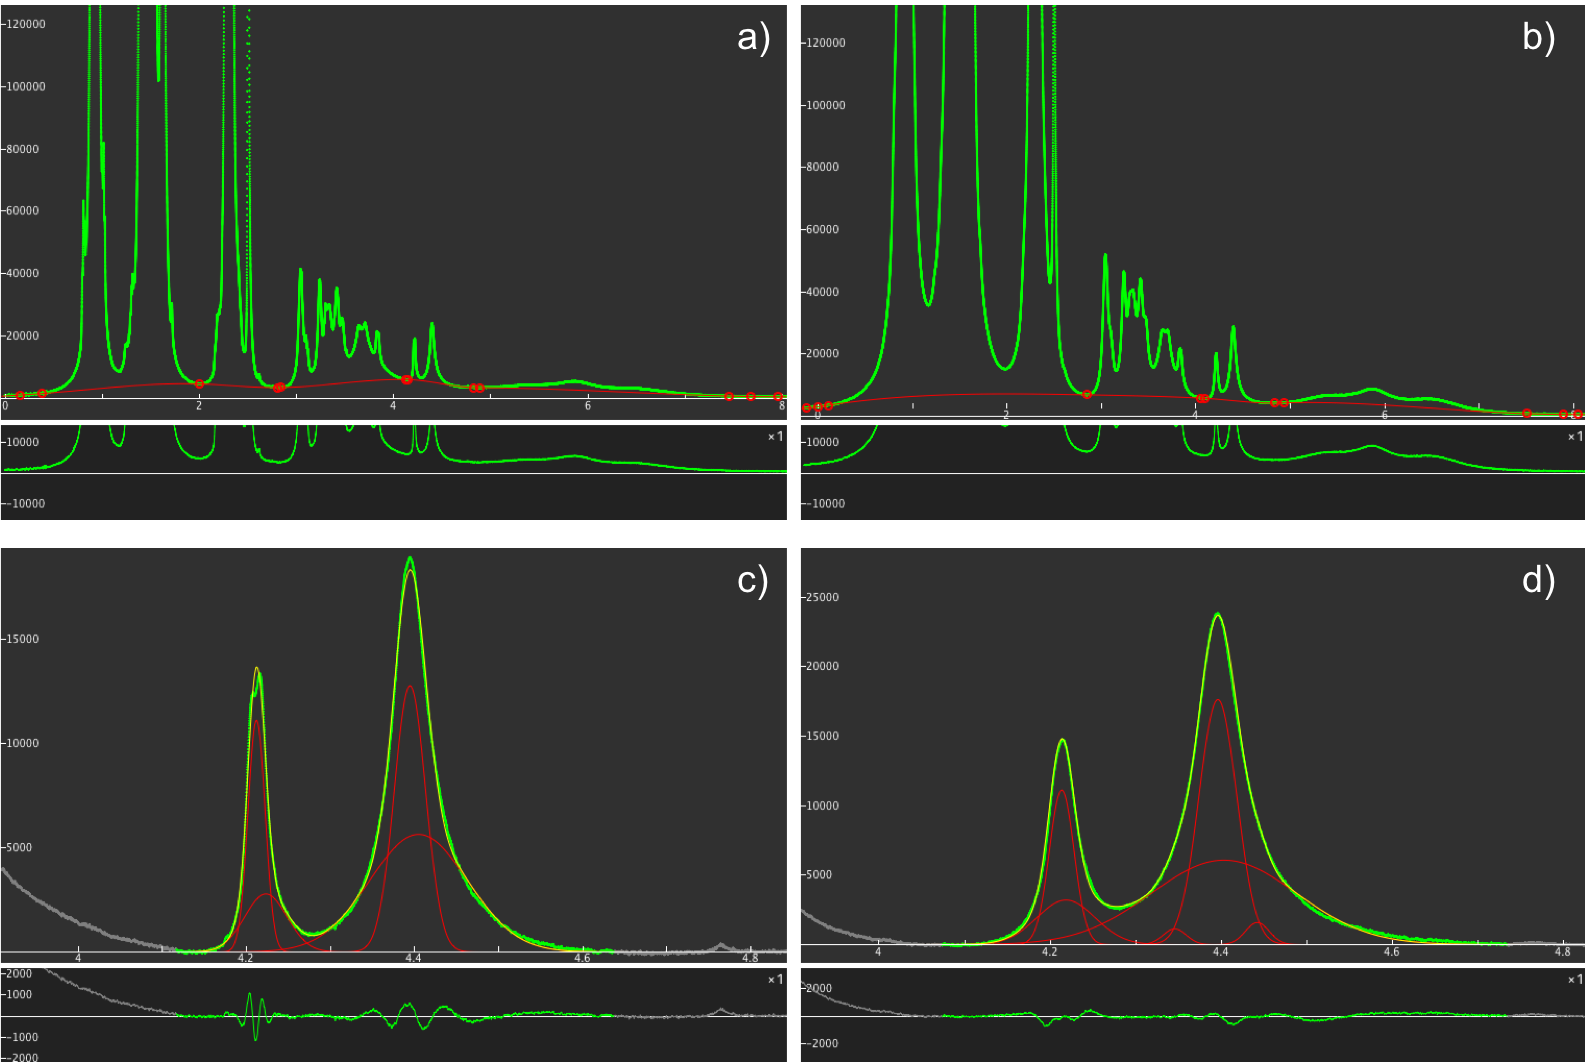
**

**Fig. S20** Spline baseline correction for a) untreated (non-dissolving) Eucalyptus and b) pre-treated (non-dissolving) Eucalyptus, followed by Gaussian deconvolution of the AXU and AGU peaks for c) untreated (non-dissolving) Eucalyptus and d) pre-treated (non-dissolving) Eucalyptus.

### NMR data

The corresponding NMR spectra for the homogeneously acetylated Enocell standard samples (**Table S3**) are shown in **figures S21-S32**. The NMR spectra corresponding to the acetylation of the pulps of our studies are also shown in; **figures S33-S50** with acetic anhydride as acetylating reagent and **figures S51-S66** with isopropenyl acetate as acetylating reagent.


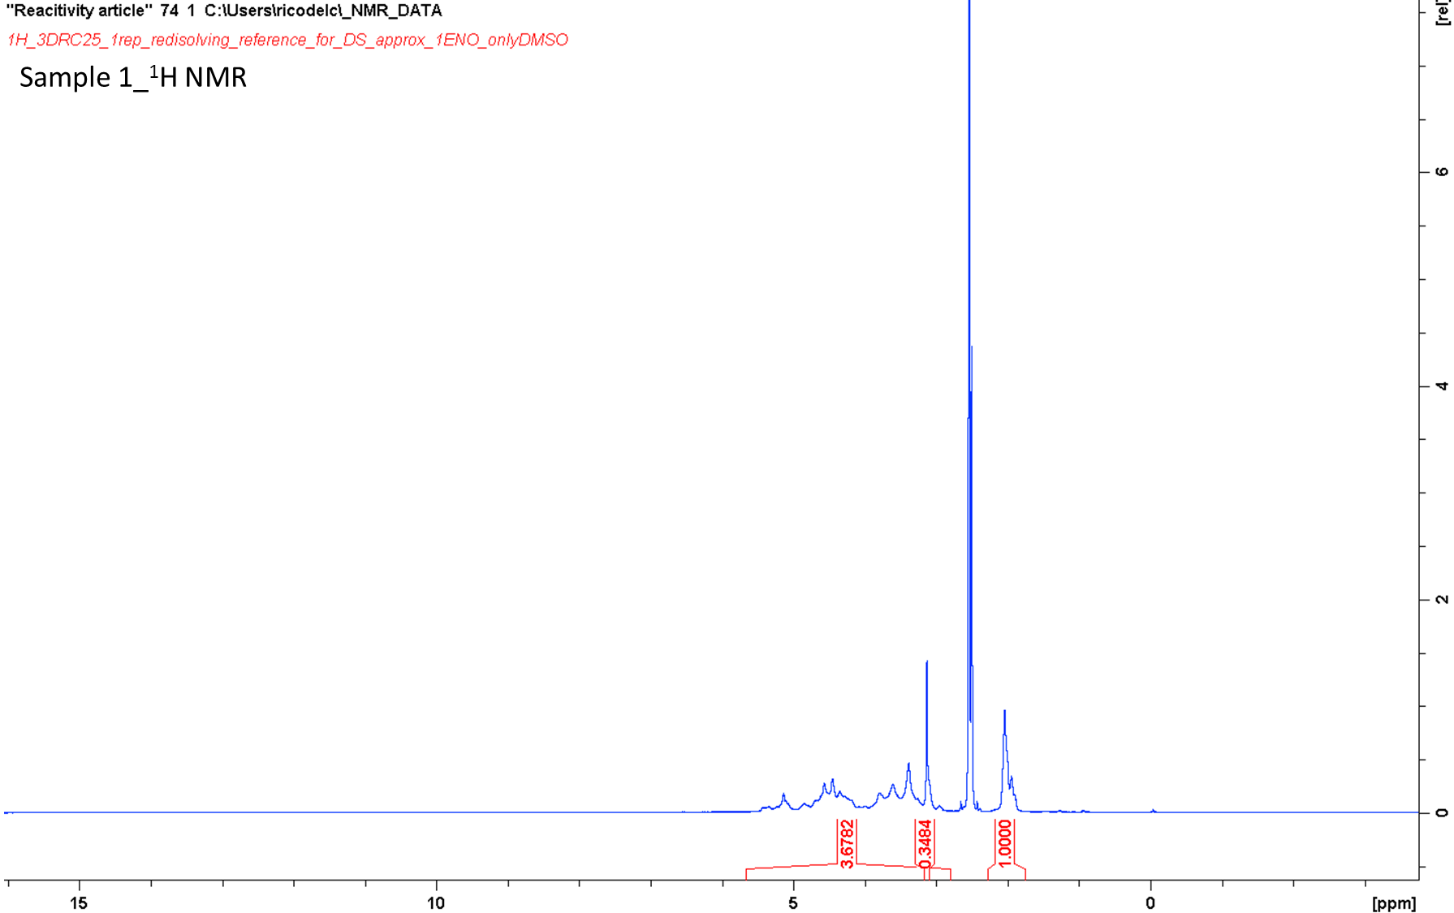


**Fig. S21** 1H NMR spectrum of Enocell standard sample 1.


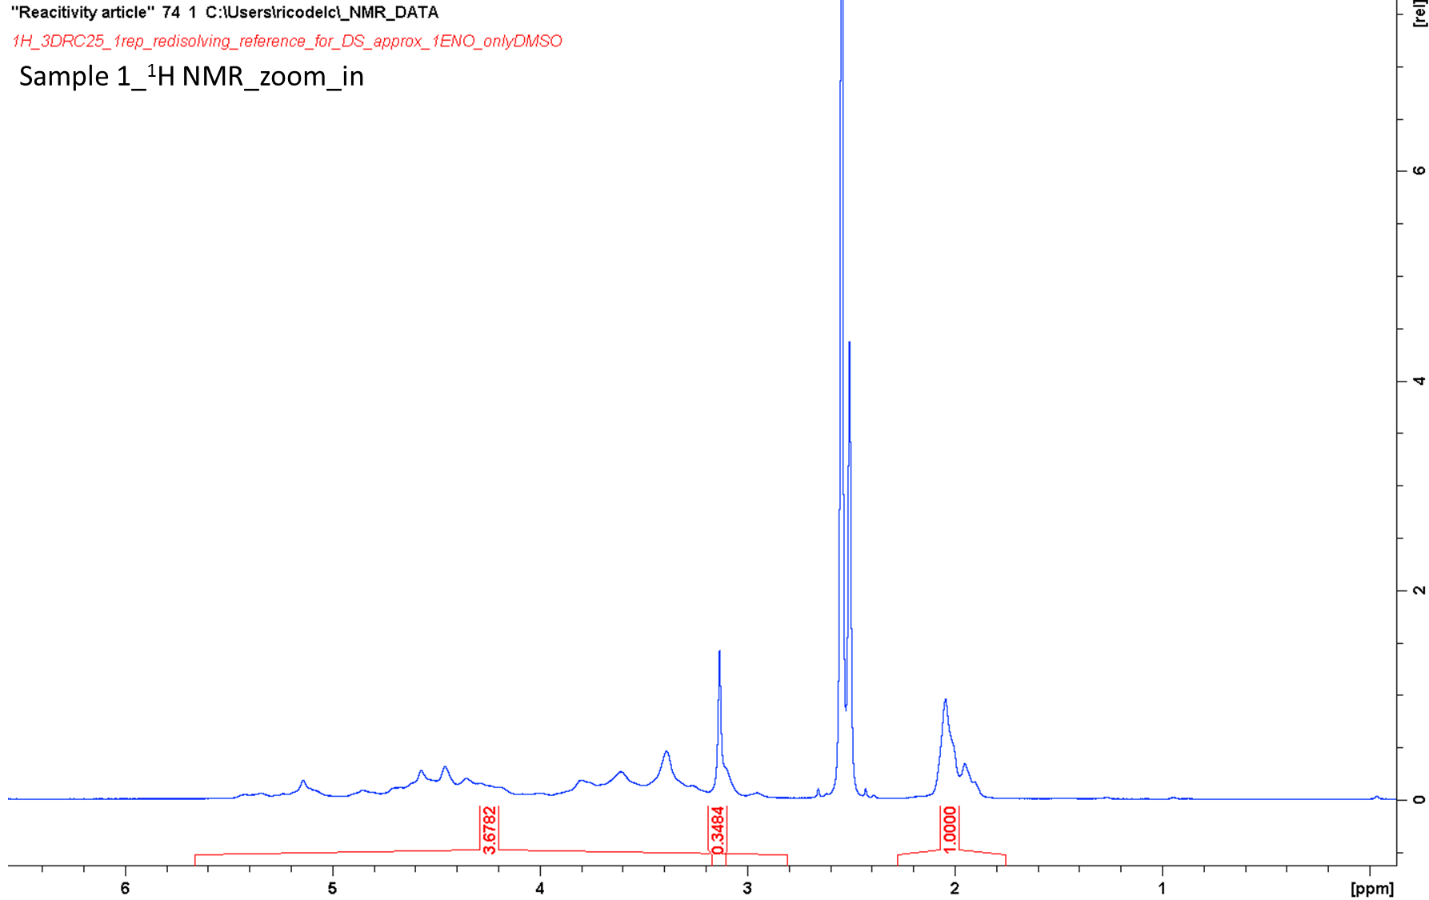


**Fig. S22** Expanded 1H NMR spectrum of Enocell standard sample 1.


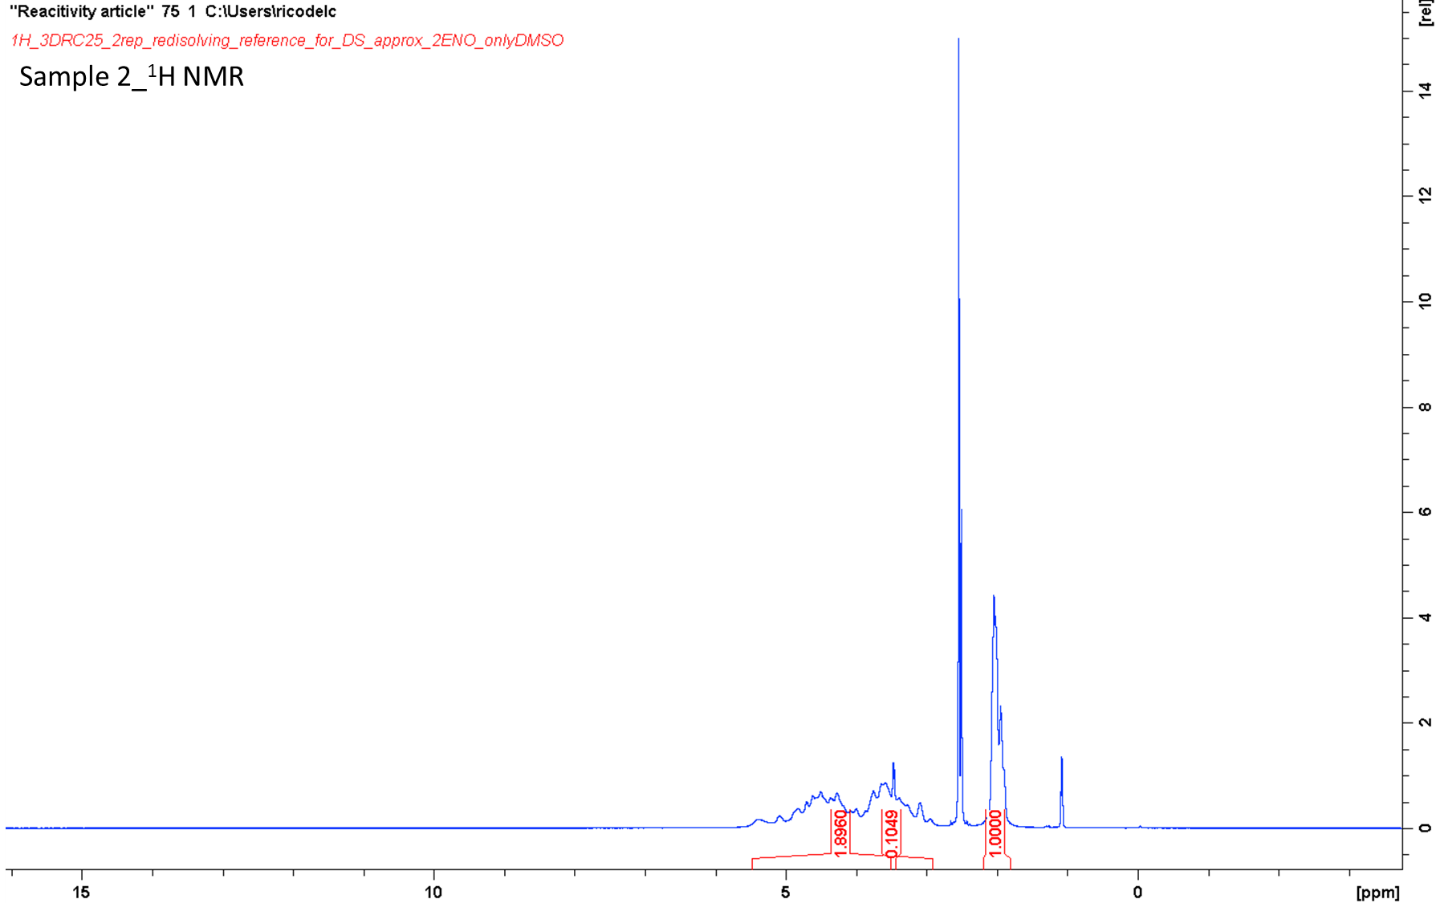


**Fig. S23** 1H NMR spectrum of Enocell standard sample 2.


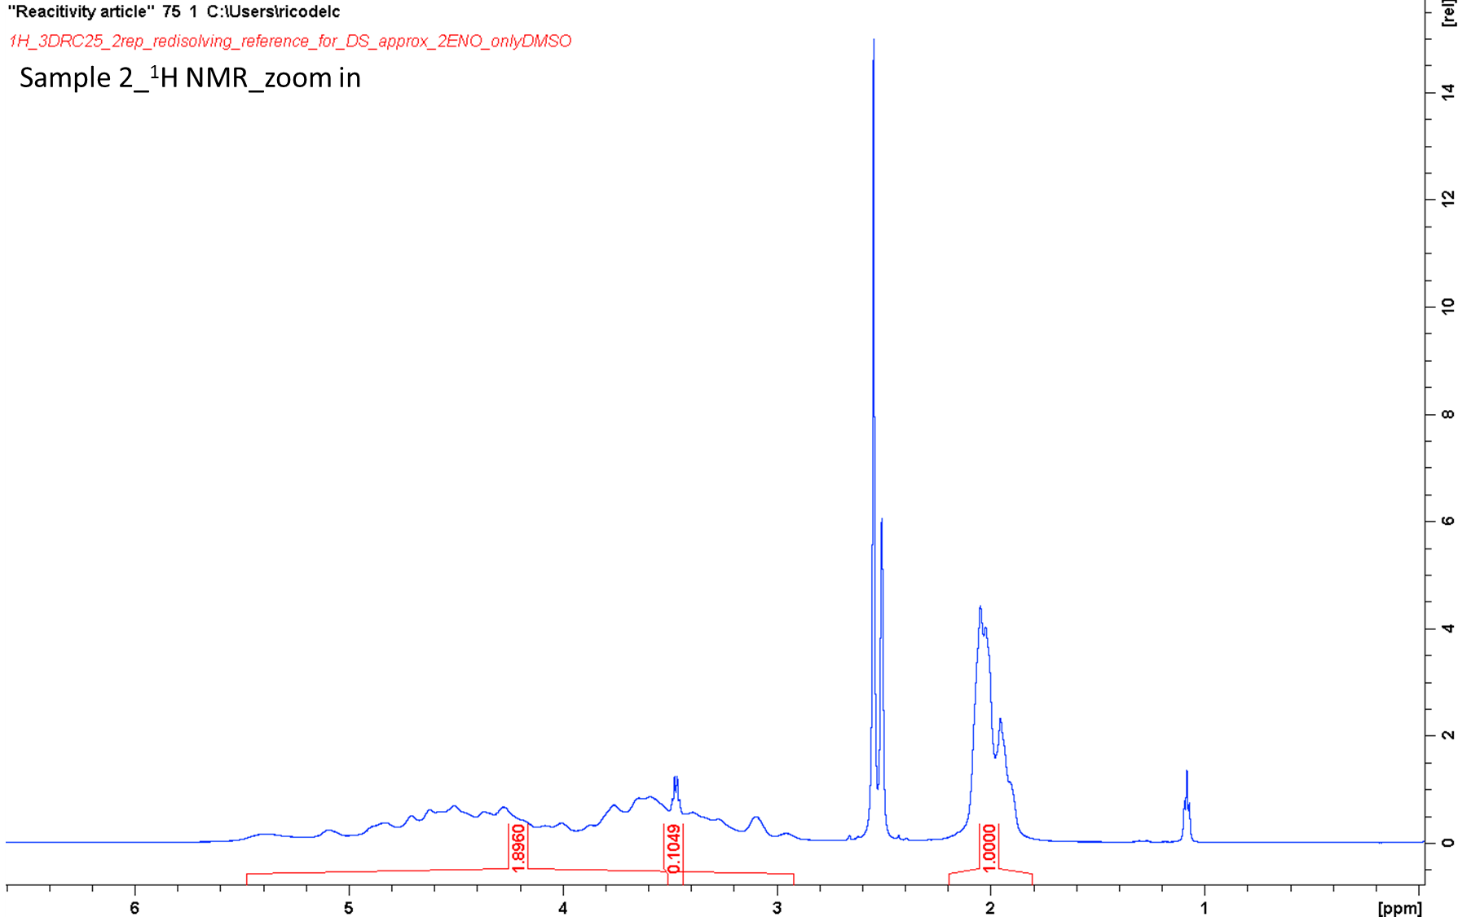


**Fig. S24** Expanded 1H NMR spectrum of Enocell standard sample 2.


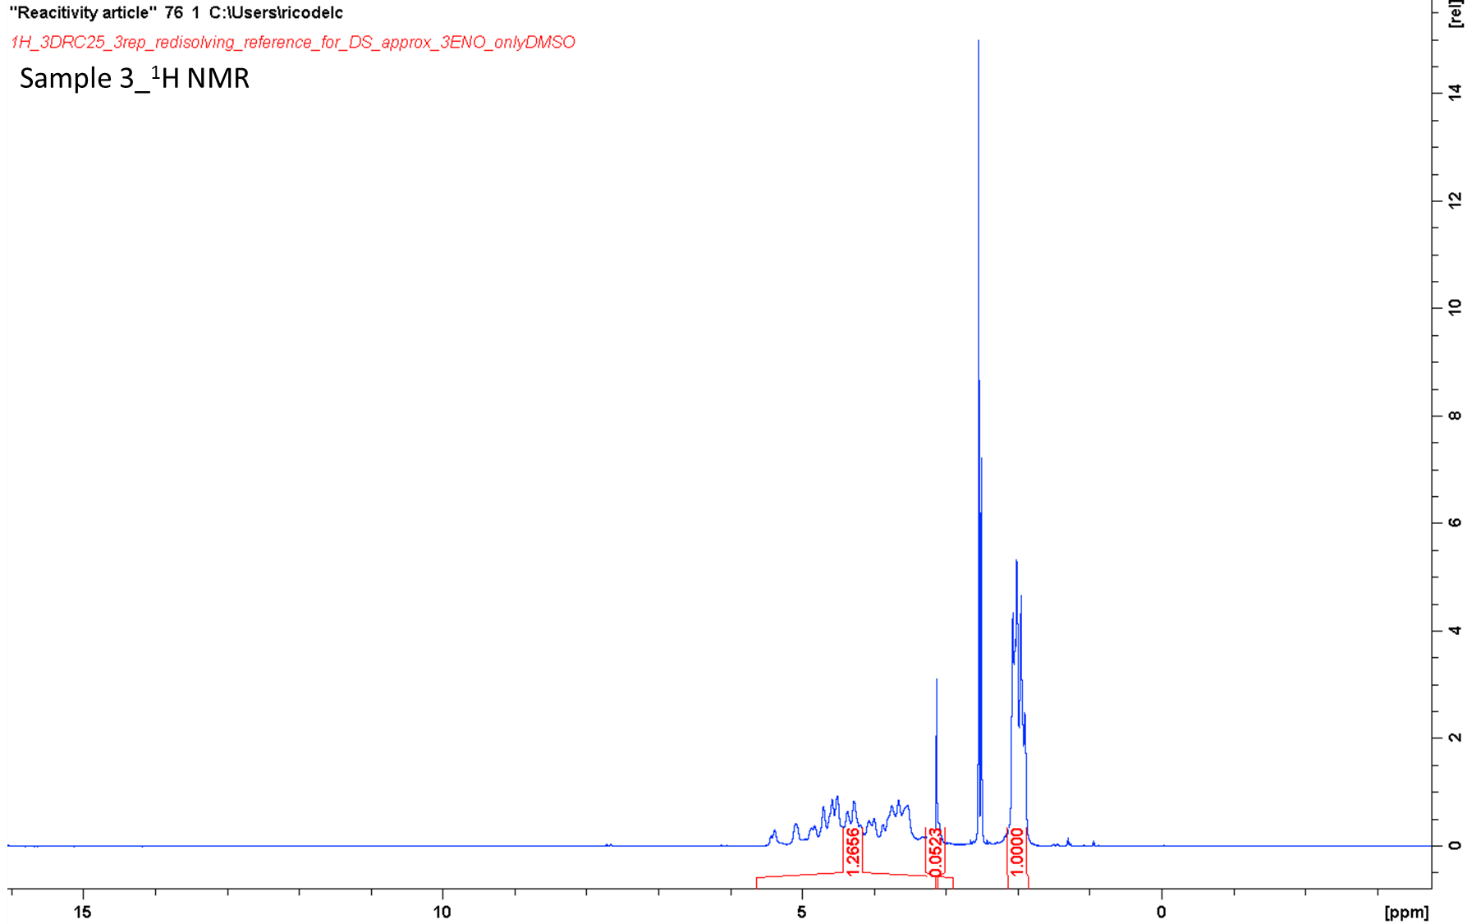


**Fig. S25** 1H NMR spectrum of Enocell standard sample 3.


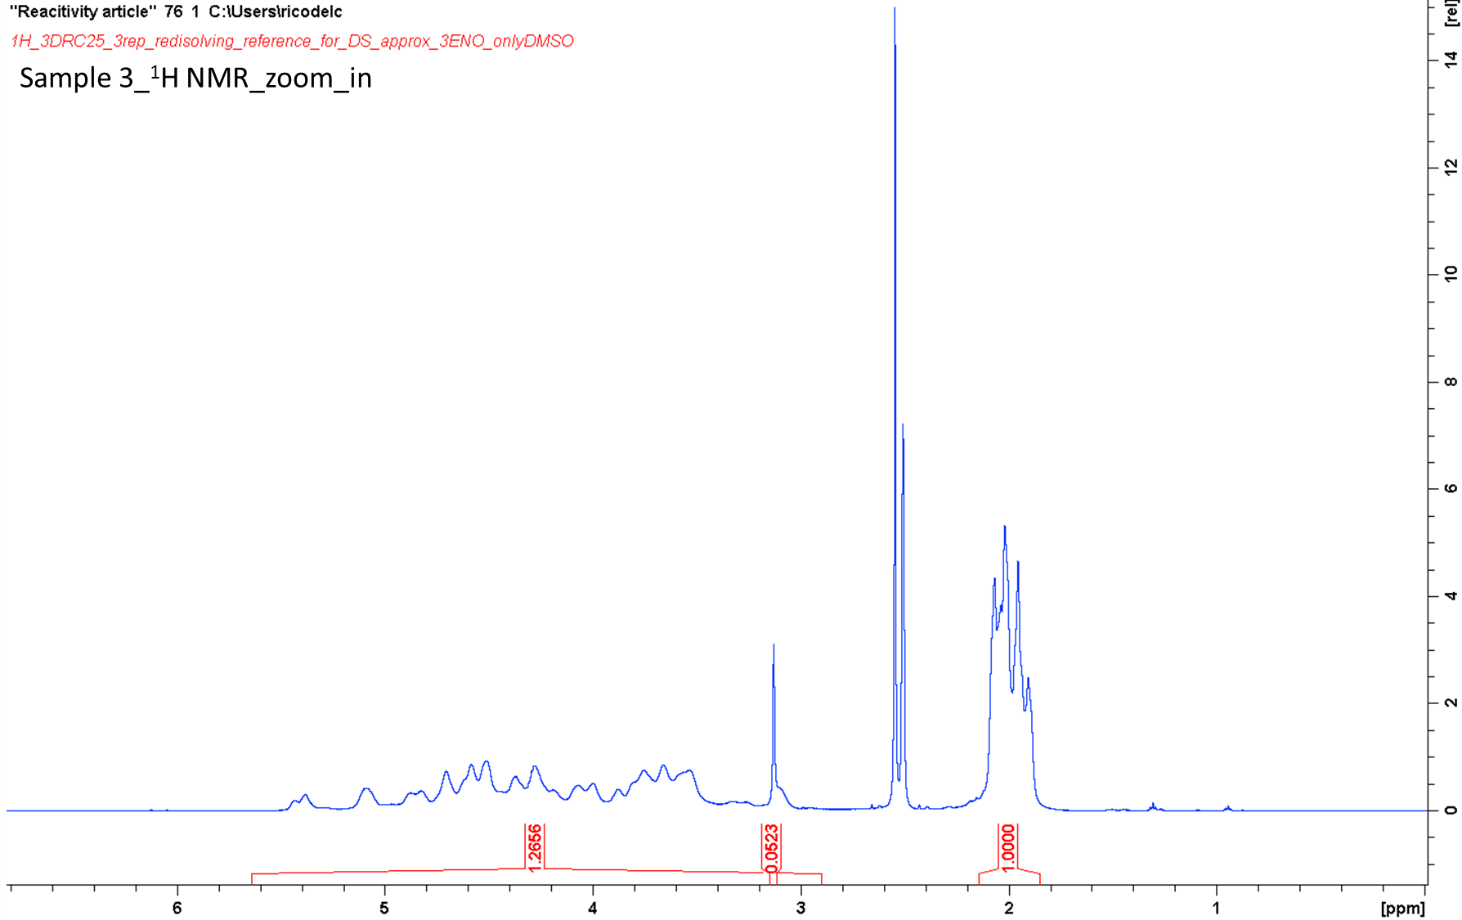


**Fig. S26** Expanded 1H NMR spectrum of Enocell standard sample 3.


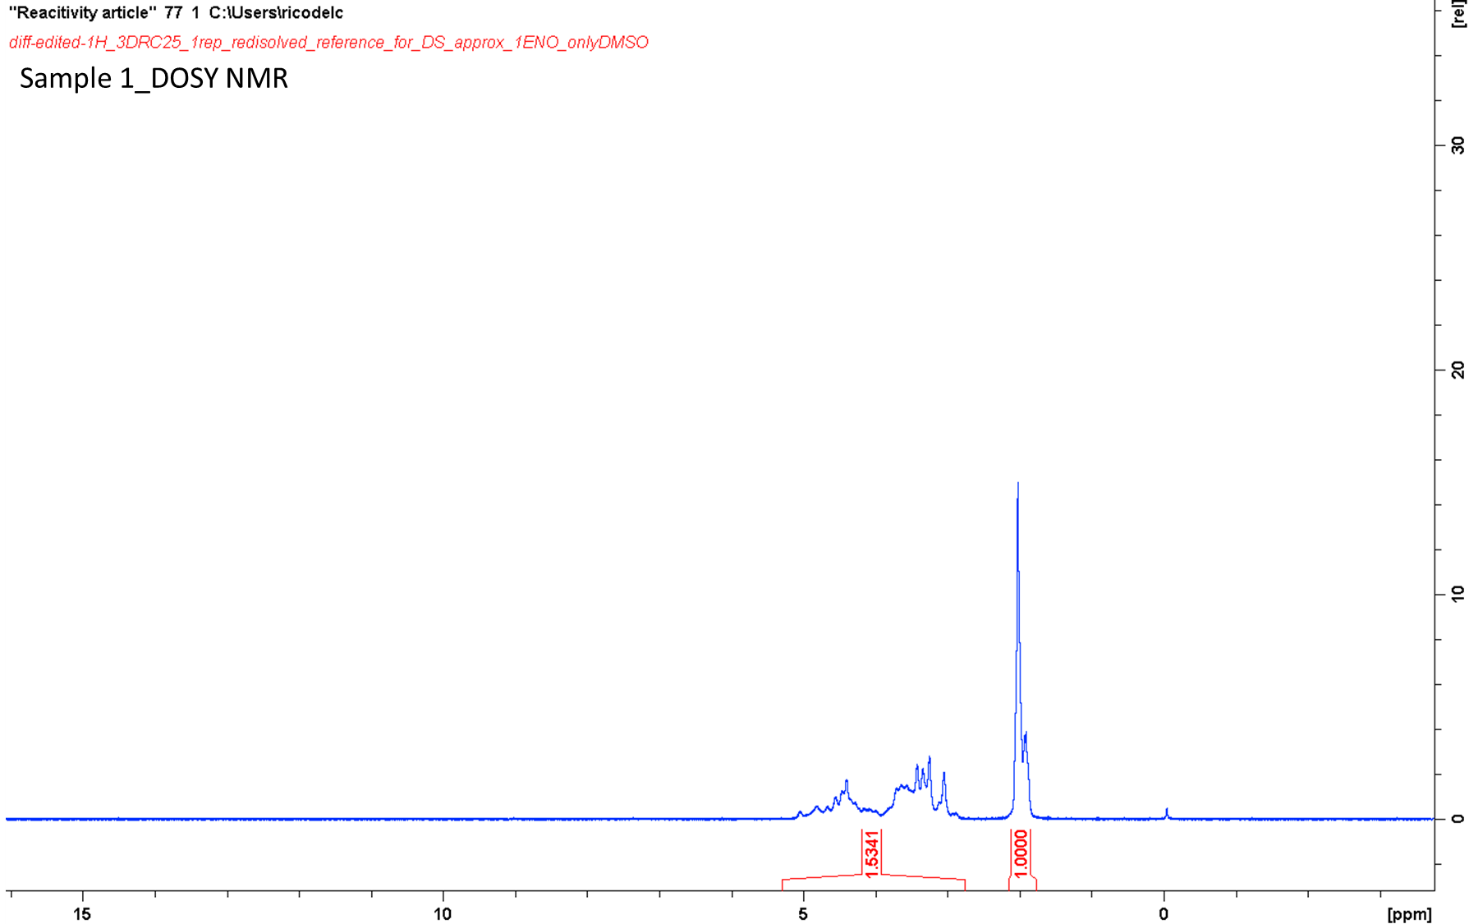


**Fig. S27** Diffusion-edited 1H NMR spectrum of Enocell standard sample 1.


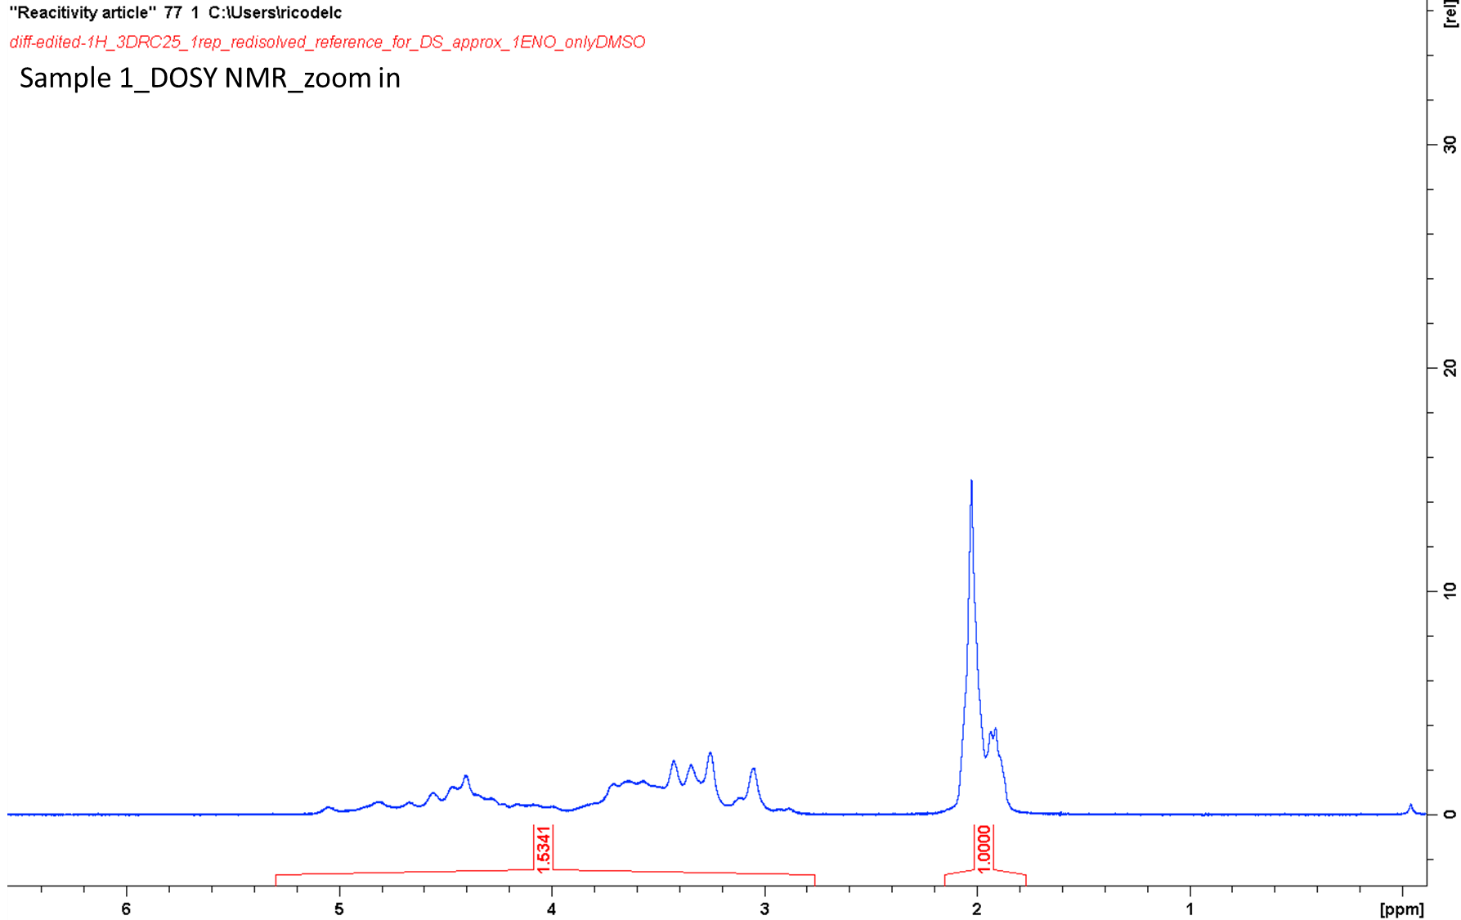


**Fig. S28** Expanded diffusion-edited 1H NMR spectrum of Enocell standard sample 1.


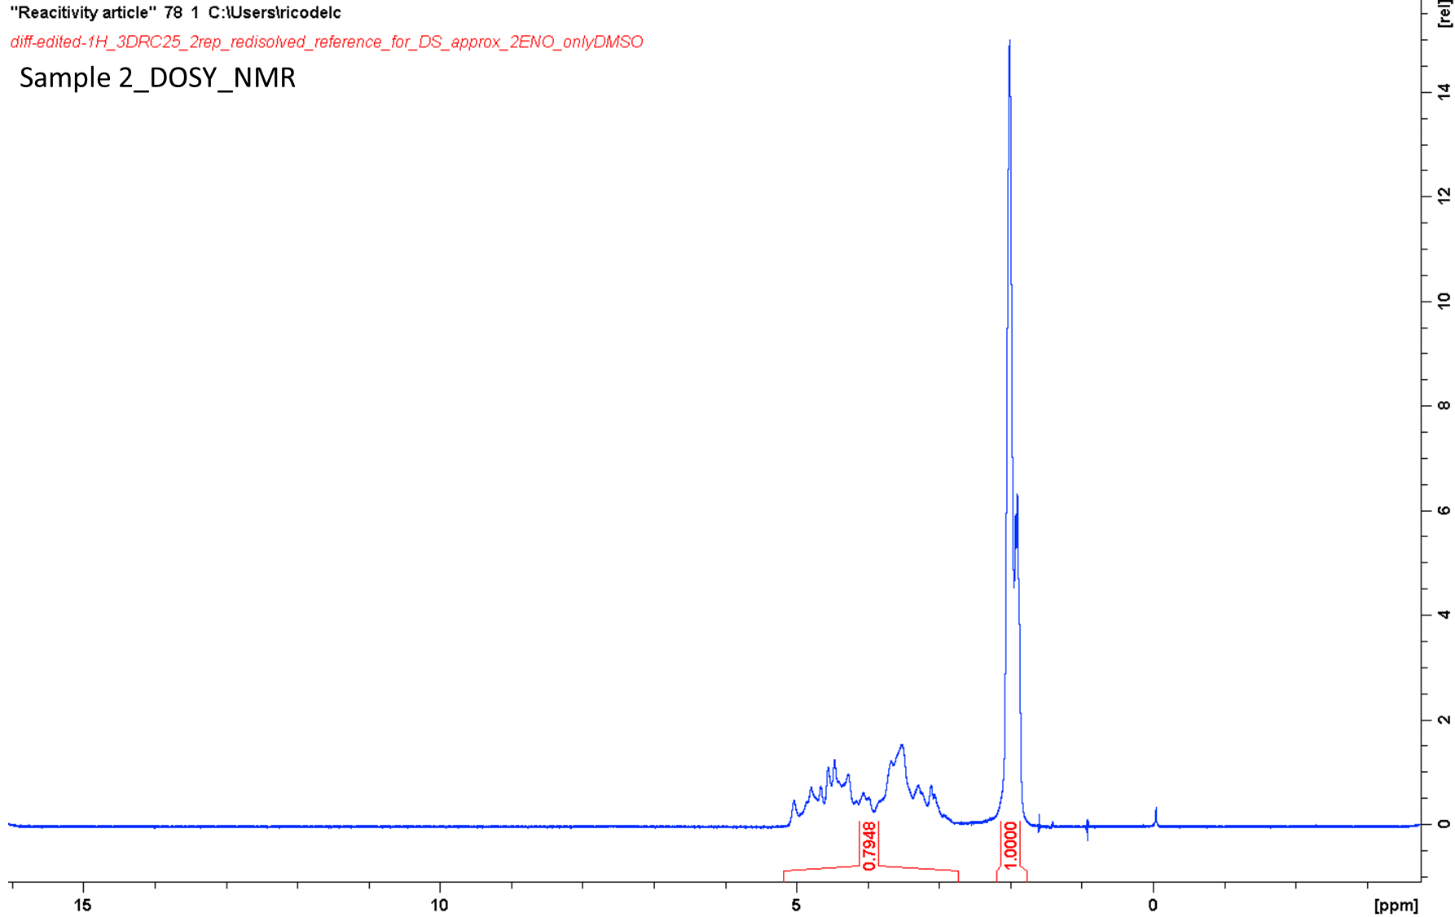


**Fig. S29** Diffusion-edited 1H NMR spectrum of Enocell standard sample 2.


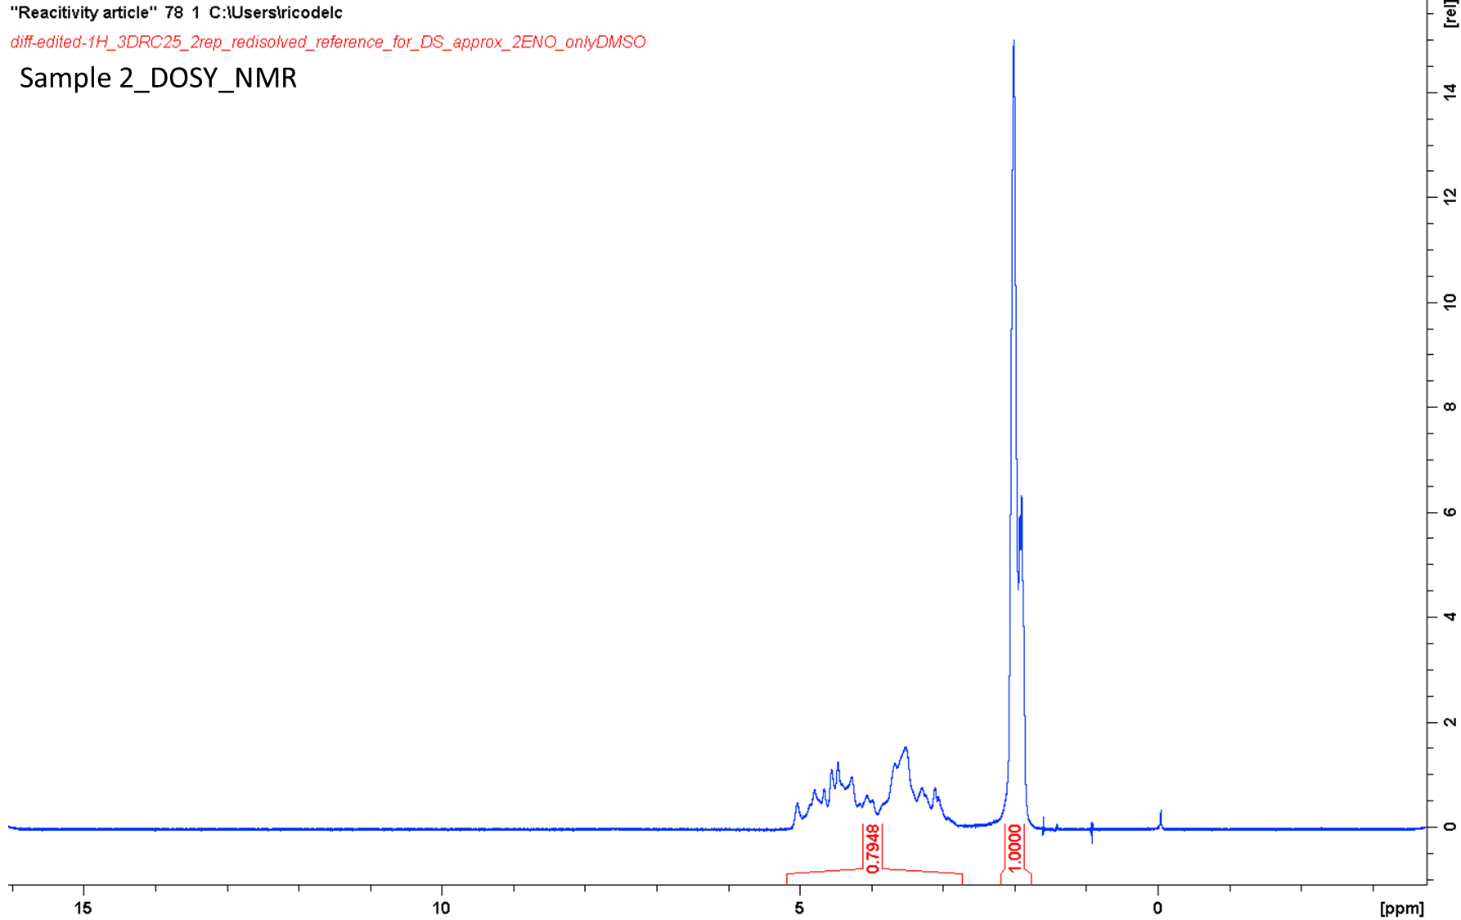


**Fig. S30** Expanded diffusion-edited 1H NMR spectrum of Enocell standard sample 2.


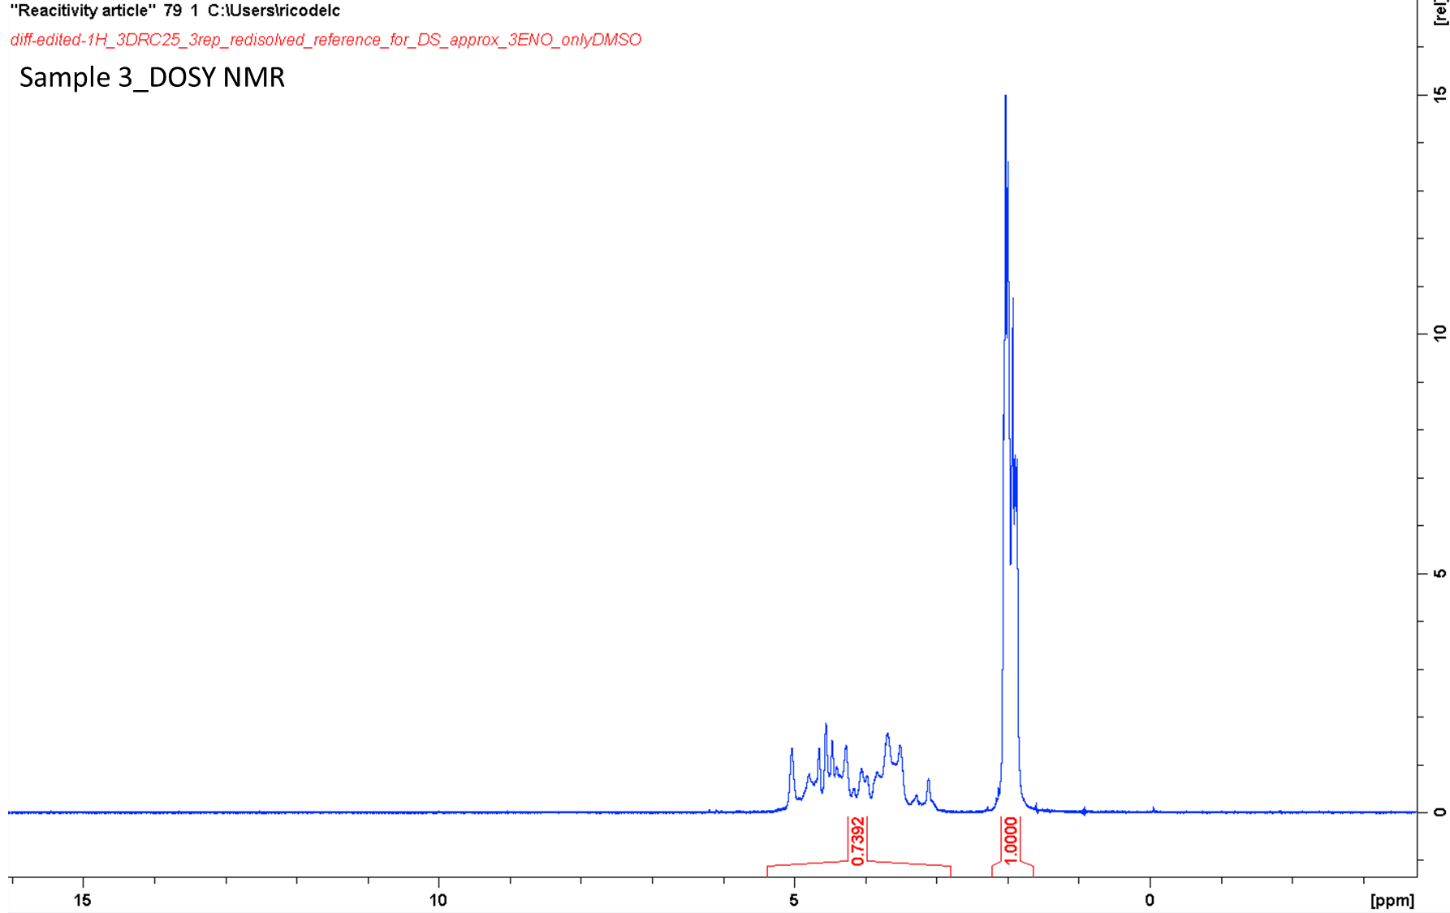


**Fig. S31** Diffusion-edited 1H NMR spectrum of Enocell standard sample 3.


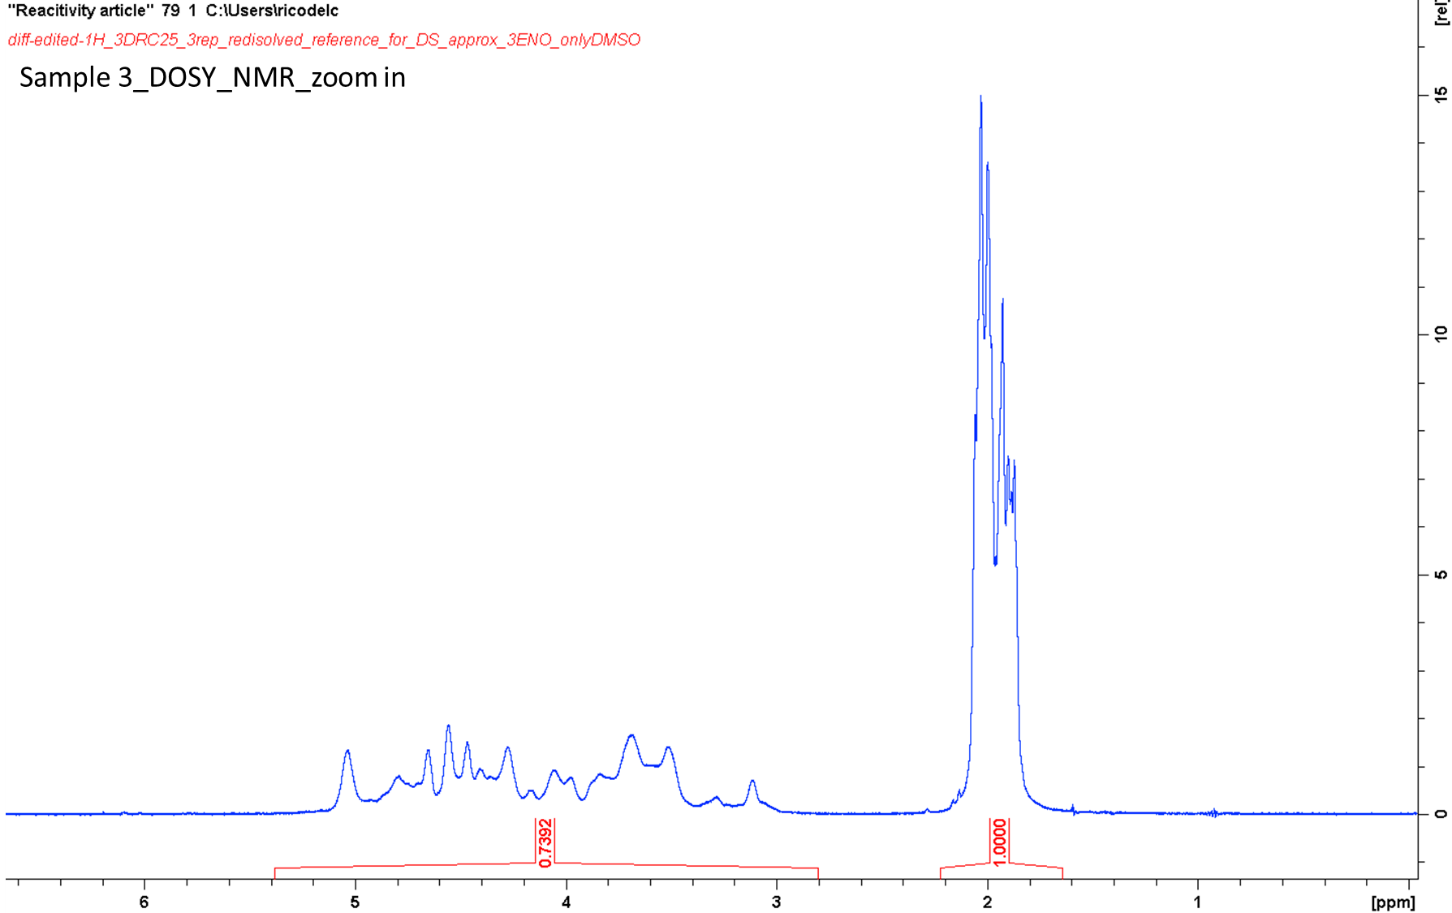


**Fig. S32** Expanded diffusion-edited 1H NMR spectrum of Enocell standard sample 3.


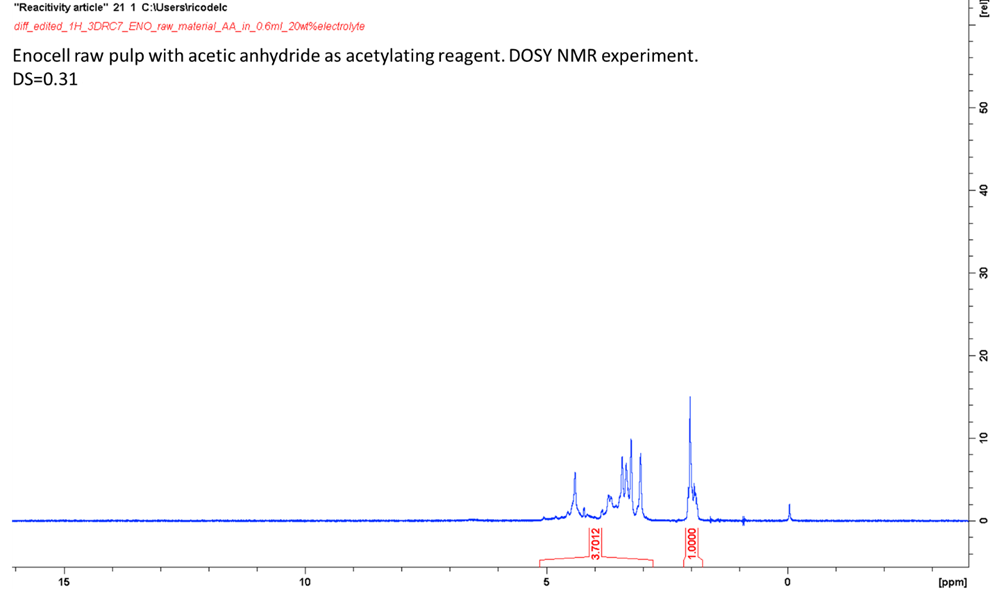


**Fig. S33** Diffusion-edited 1H NMR spectrum of acetylated Enocell raw pulp with acetic anhydride as acetylating reagent.


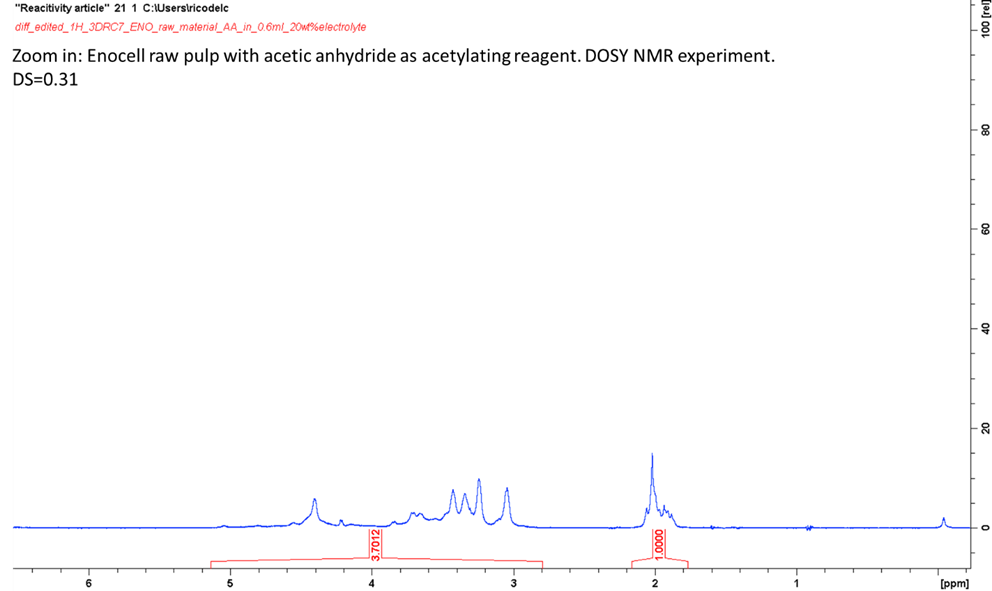


**Fig. S34** Expanded diffusion-edited 1H NMR spectrum of acetylated Enocell raw pulp with acetic anhydride as acetylating reagent.


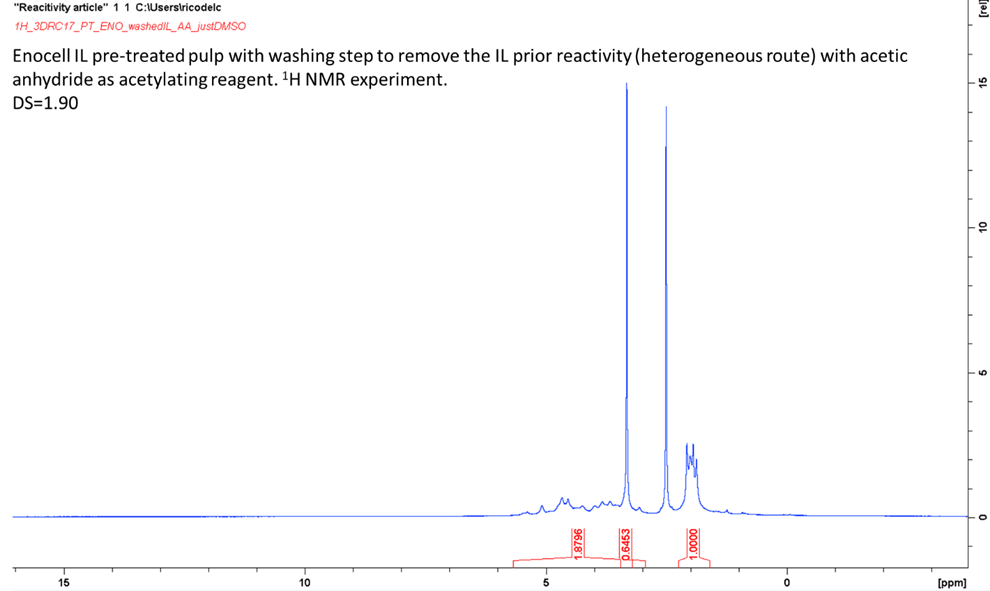


**Fig. S35** 1H NMR spectrum of acetylated Enocell IL pre-treated pulp with acetic anhydride as acetylating reagent, heterogeneous route.


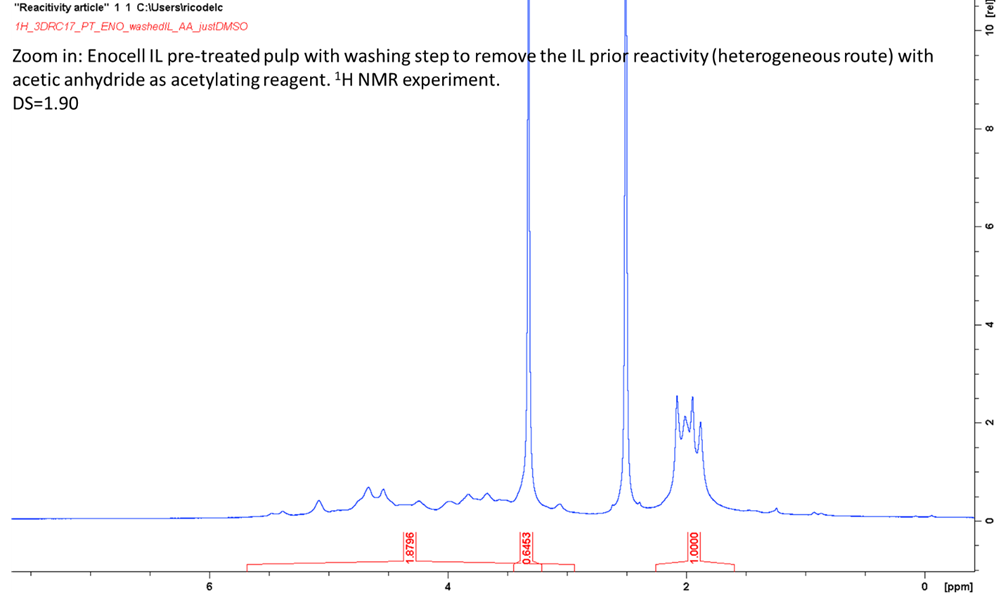


**Fig. S36** Expanded 1H NMR spectrum of acetylated Enocell IL pre-treated pulp with acetic anhydride as acetylating reagent, heterogeneous route.


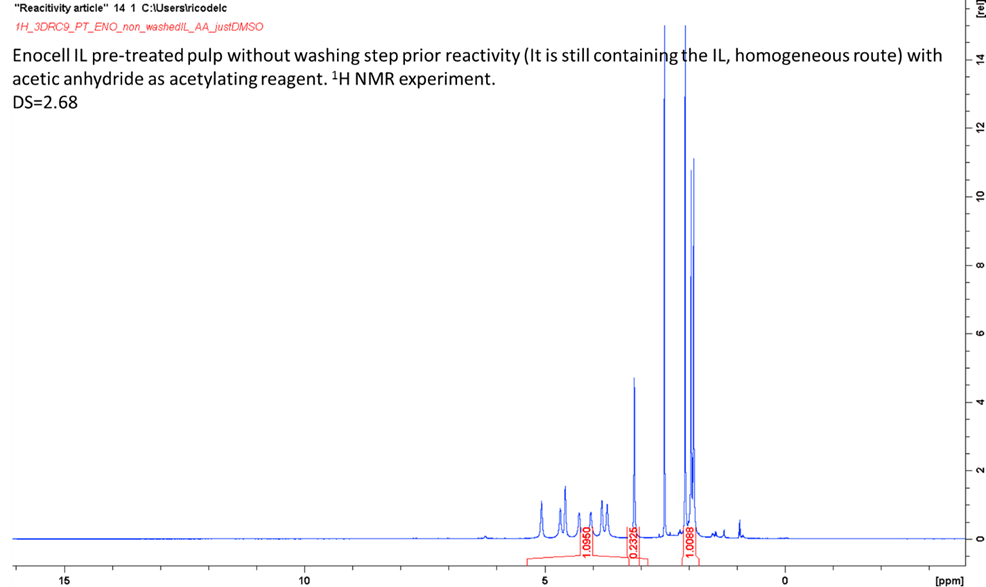


**Fig. S37** 1H NMR spectrum of acetylated Enocell IL pre-treated pulp with acetic anhydride as acetylating reagent, homogeneous route.


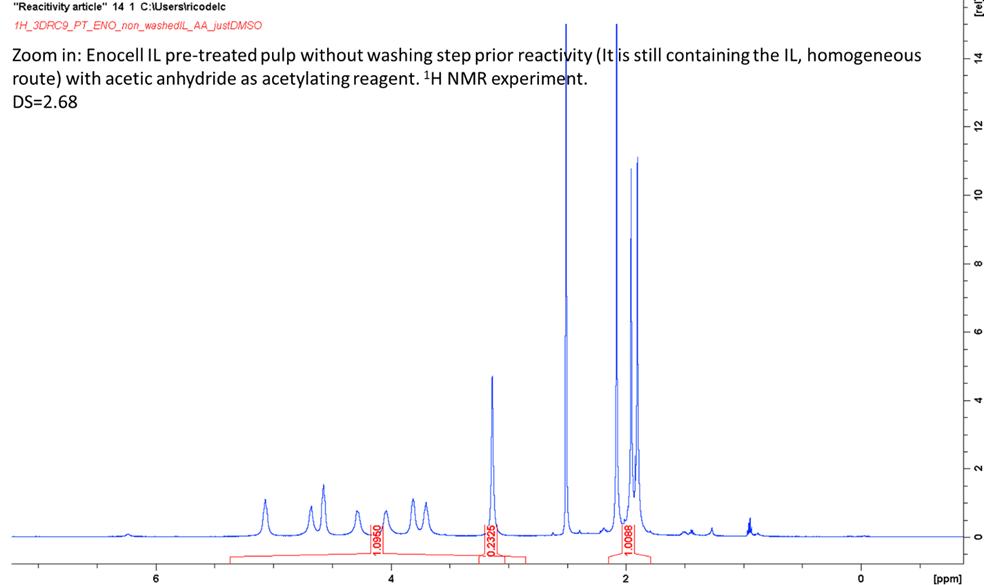


**Fig. S38** Expanded 1H NMR spectrum of acetylated Enocell IL pre-treated pulp with acetic anhydride as acetylating reagent, homogeneous route.


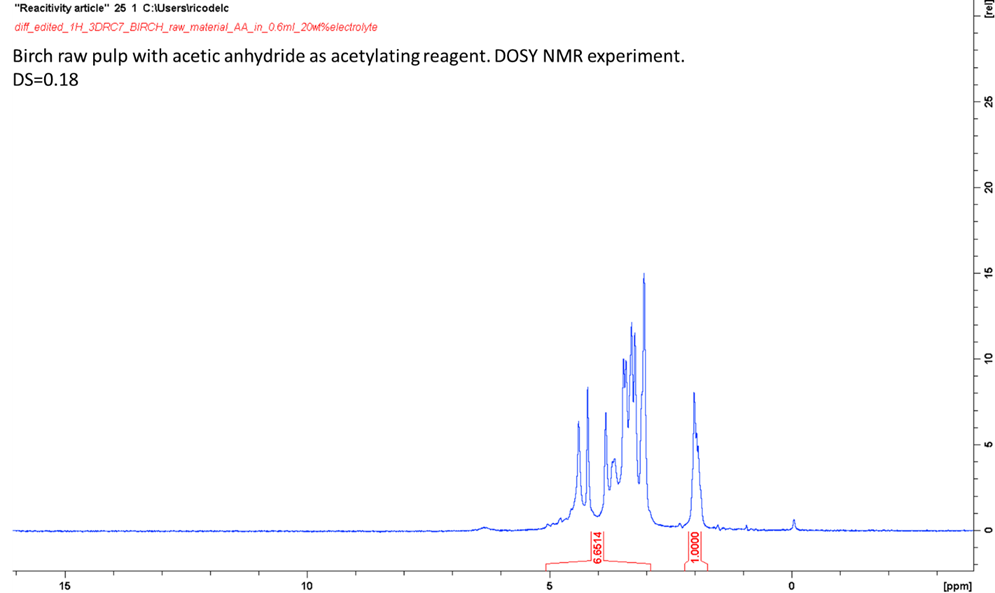


**Fig. S39** Diffusion-edited 1H NMR spectrum of acetylated Birch raw pulp with acetic anhydride as acetylating reagent.


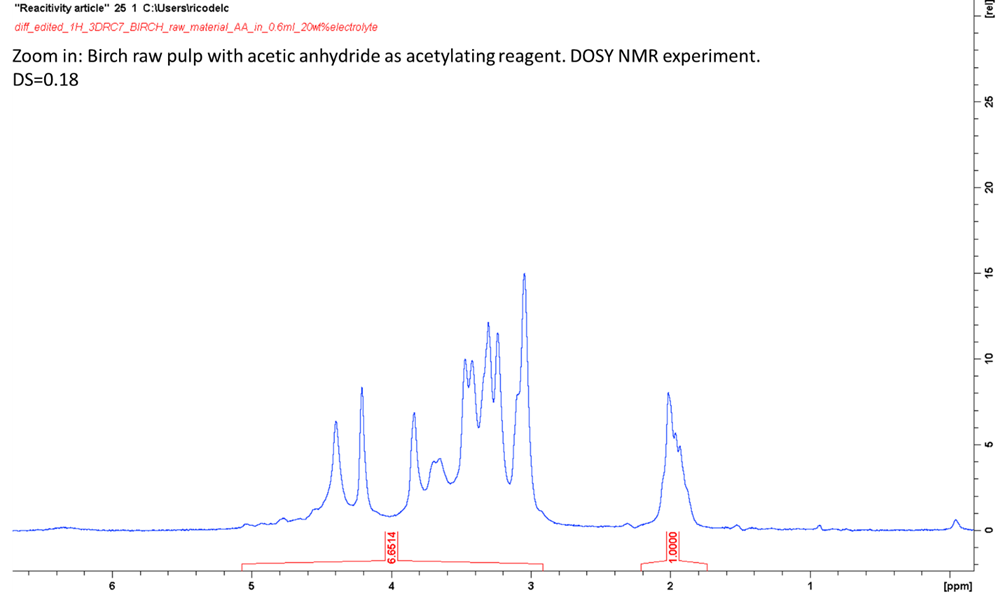


**Fig. S40** Expanded diffusion-edited 1H NMR spectrum of acetylated Birch raw pulp with acetic anhydride as acetylating reagent.


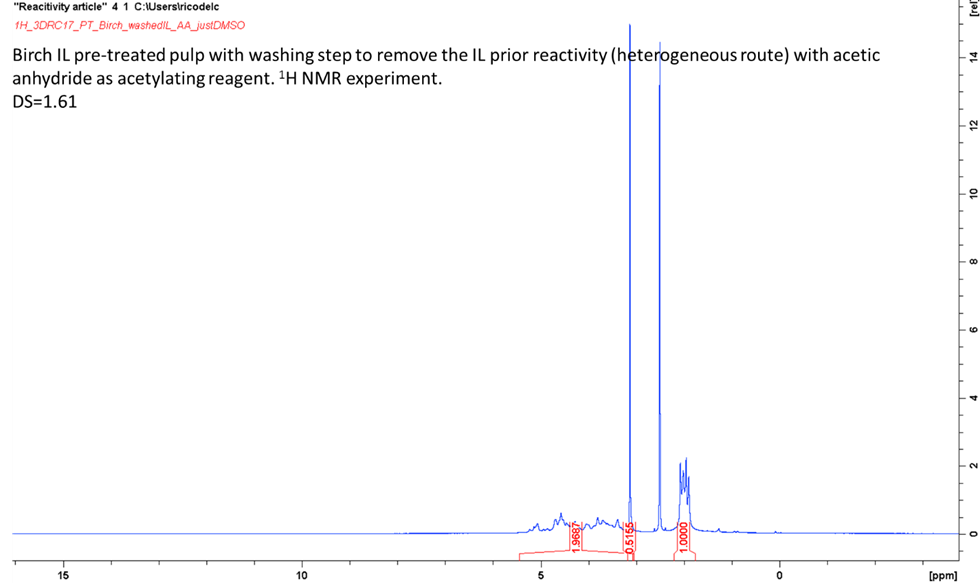


**Fig. S41** 1H NMR spectrum of acetylated Birch IL pre-treated pulp with acetic anhydride as acetylating reagent, heterogeneous route.


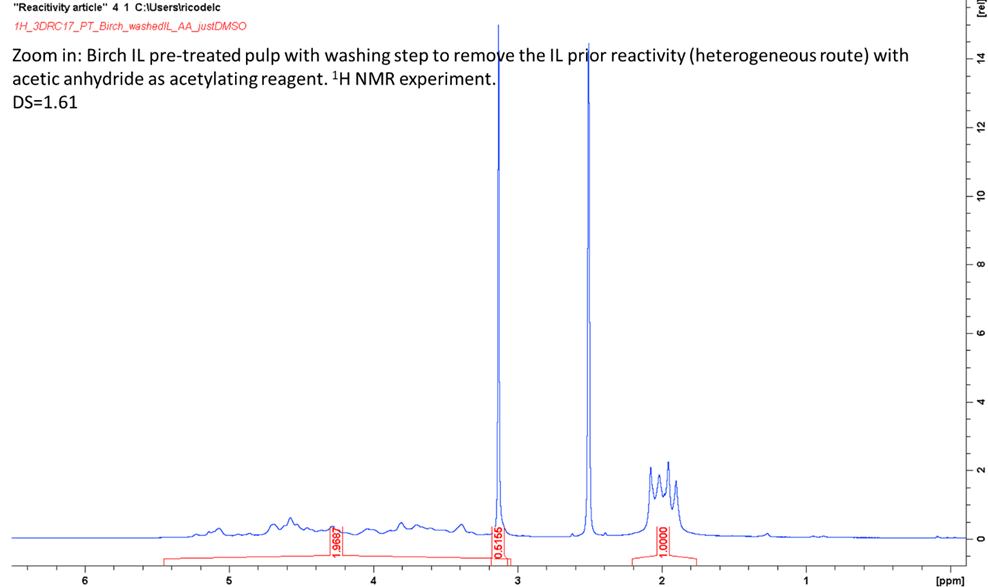


**Fig. S42** Expanded 1H NMR spectrum of acetylated Birch IL pre-treated pulp with acetic anhydride as acetylating reagent, heterogeneous route.


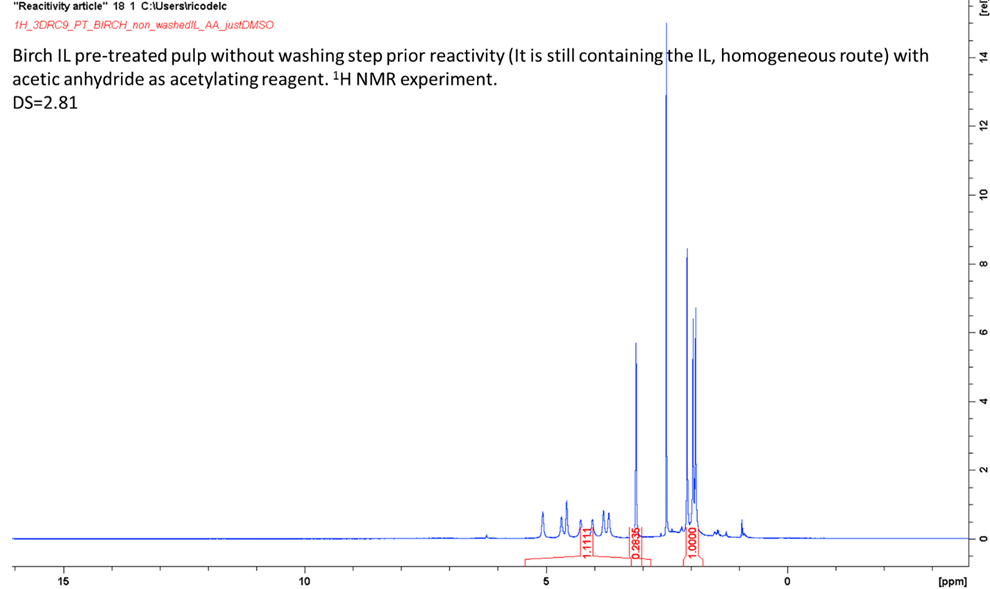


**Fig. S43** 1H NMR spectrum of acetylated Birch IL pre-treated pulp with acetic anhydride as acetylating reagent, homogeneous route.


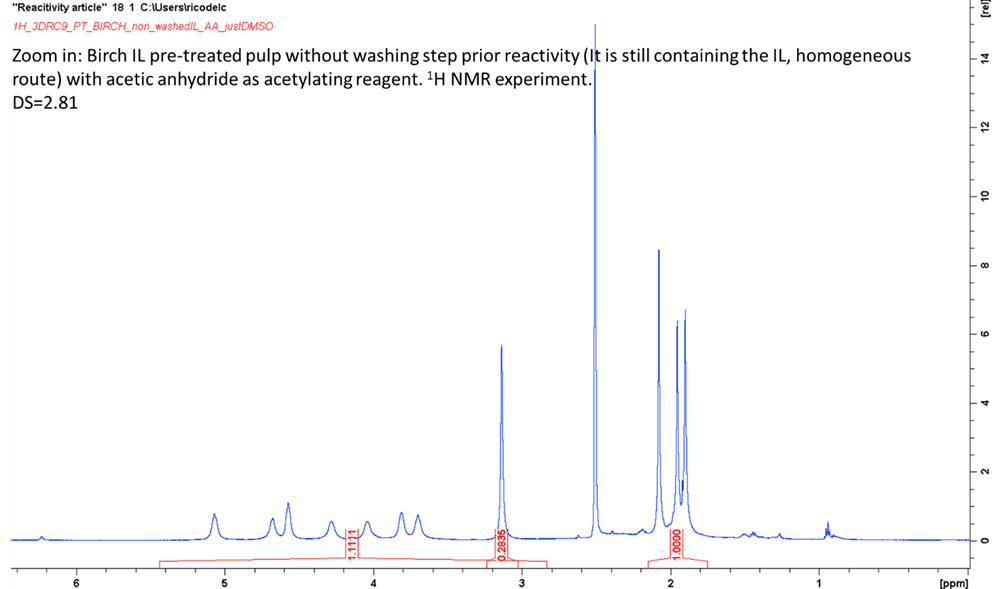


**Fig. S44** Expanded 1H NMR spectrum of acetylated Birch IL pre-treated pulp with acetic anhydride as acetylating reagent, homogeneous route.


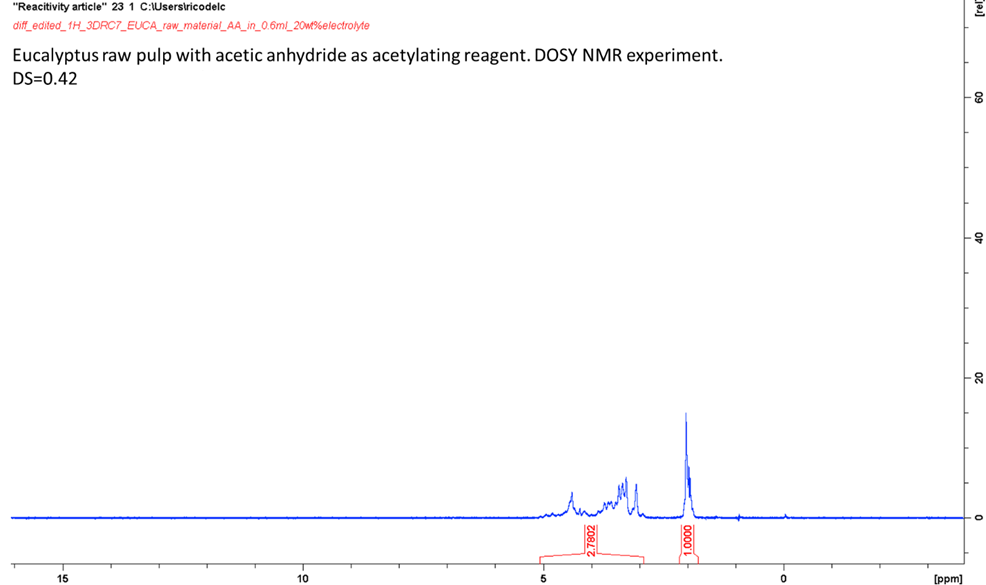


**Fig. S45** Diffusion-edited 1H NMR spectrum of acetylated Euclyptus raw pulp with acetic anhydride as acetylating reagent.


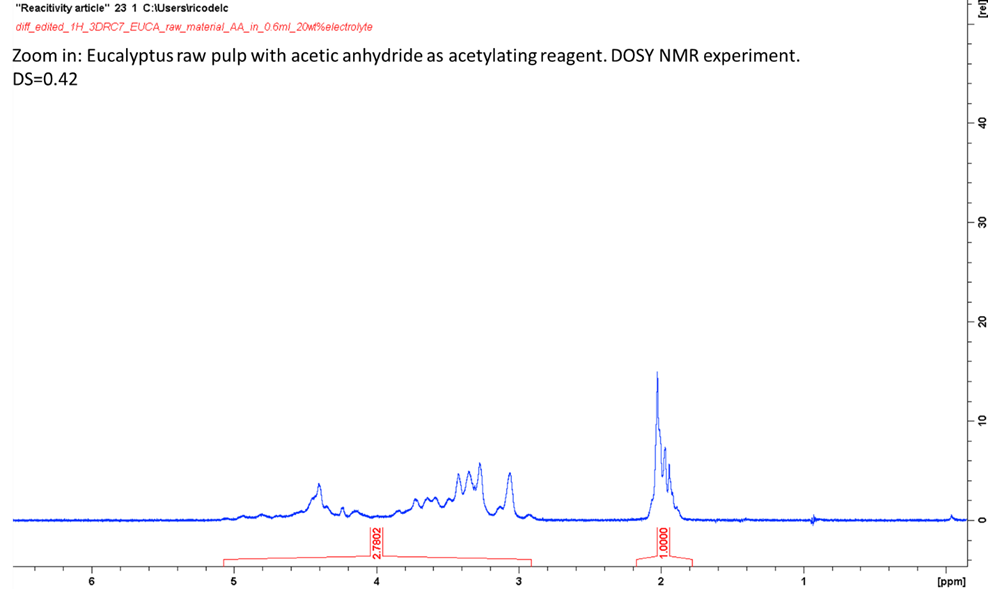


**Fig. S46** Expanded diffusion-edited 1H NMR spectrum of acetylated Euclyptus raw pulp with acetic anhydride as acetylating reagent.


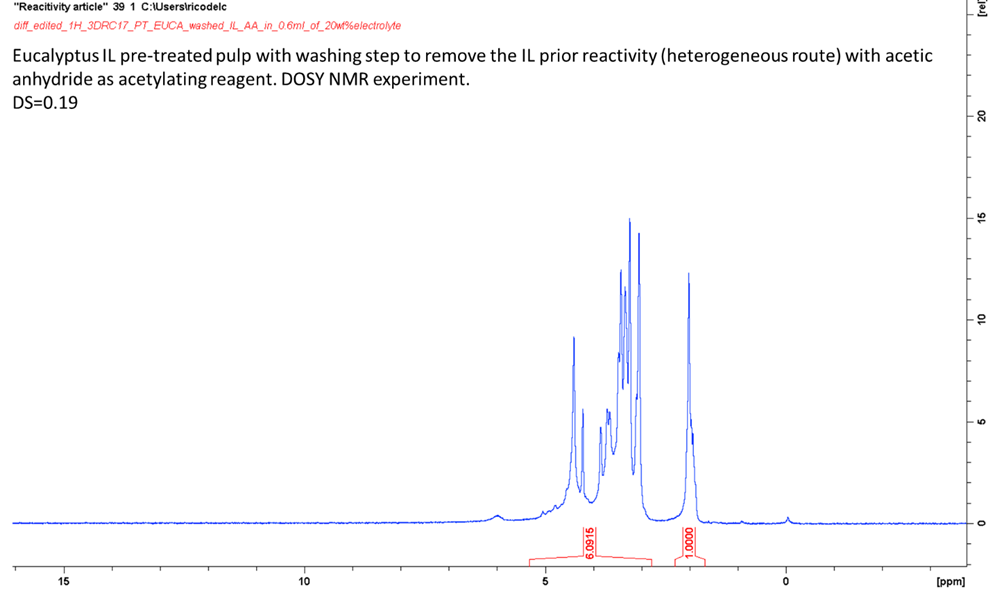


**Fig. S47** Diffusion-edited 1H NMR spectrum of acetylated Eucalyptus IL pre-treated pulp with acetic anhydride as acetylating reagent, heterogeneous route.


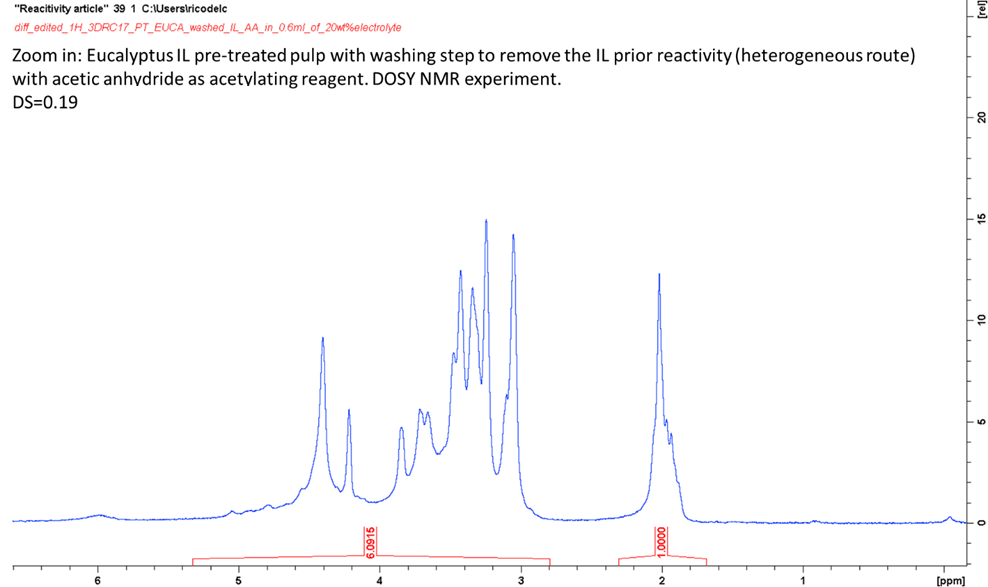


**Fig. S48** Expanded diffusion-edited 1H NMR spectrum of acetylated Eucalyptus IL pre-treated pulp with acetic anhydride as acetylating reagent, heterogeneous route.


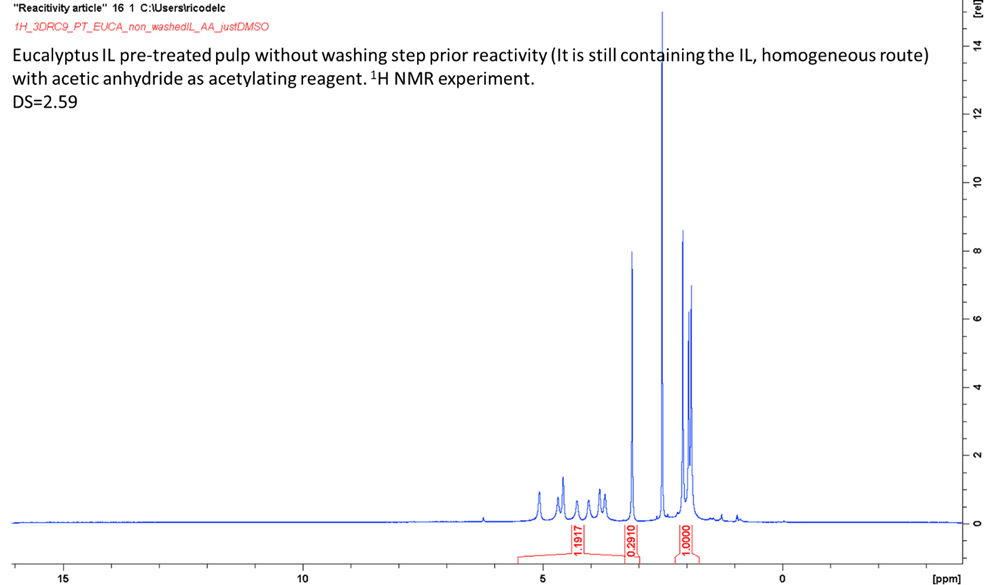


**Fig. S49** 1H NMR spectrum of acetylated Eucalyptus IL pre-treated pulp with acetic anhydride as acetylating reagent, homogeneous route.


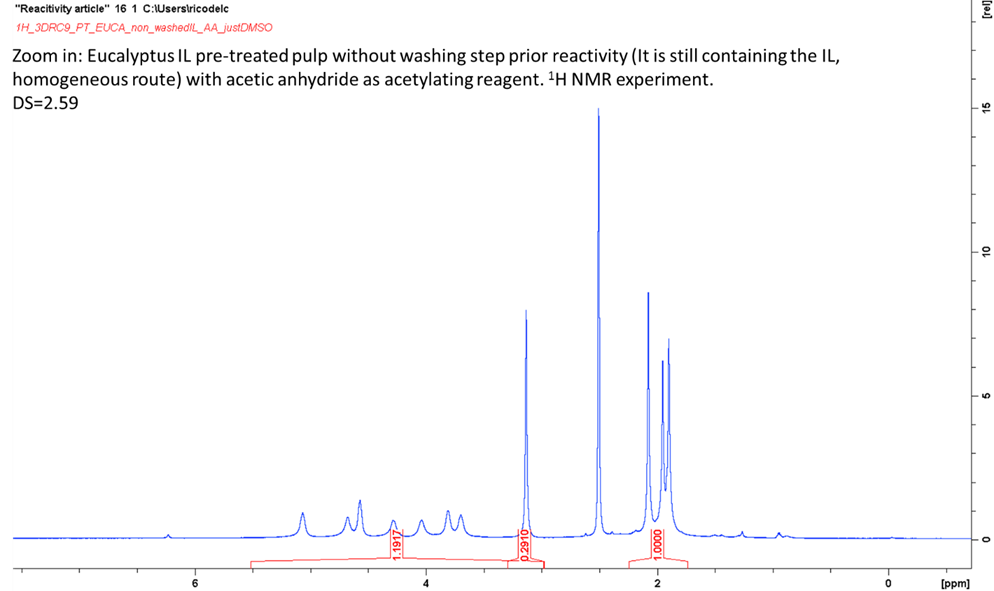


**Fig. S50** Expanded 1H NMR spectrum of acetylated Eucalyptus IL pre-treated pulp with acetic anhydride as acetylating reagent, homogeneous route.


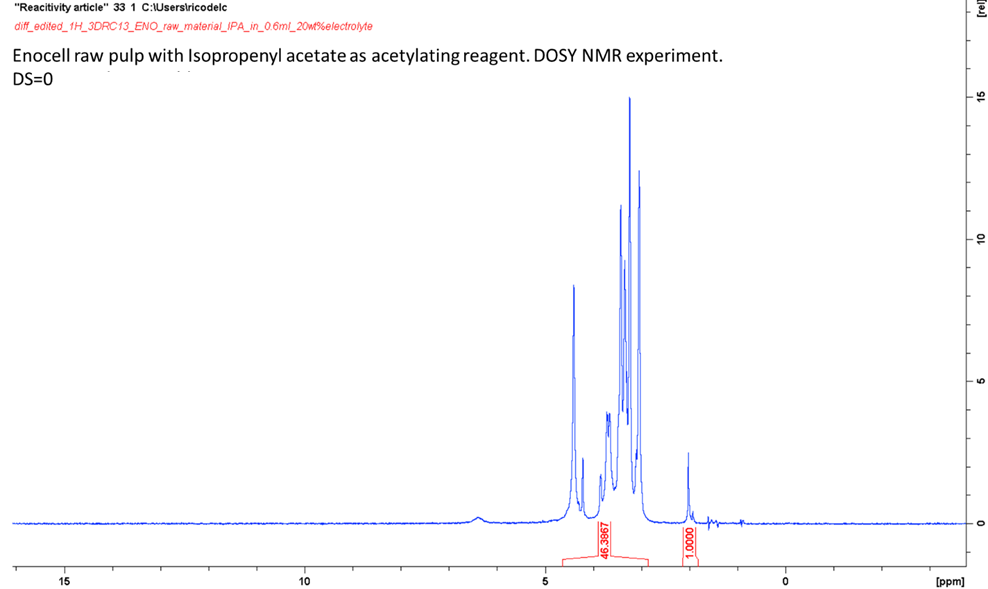


**Fig. S51** Diffusion-edited 1H NMR spectrum of acetylated Enocell raw pulp with isopropenyl acetate as acetylating reagent.


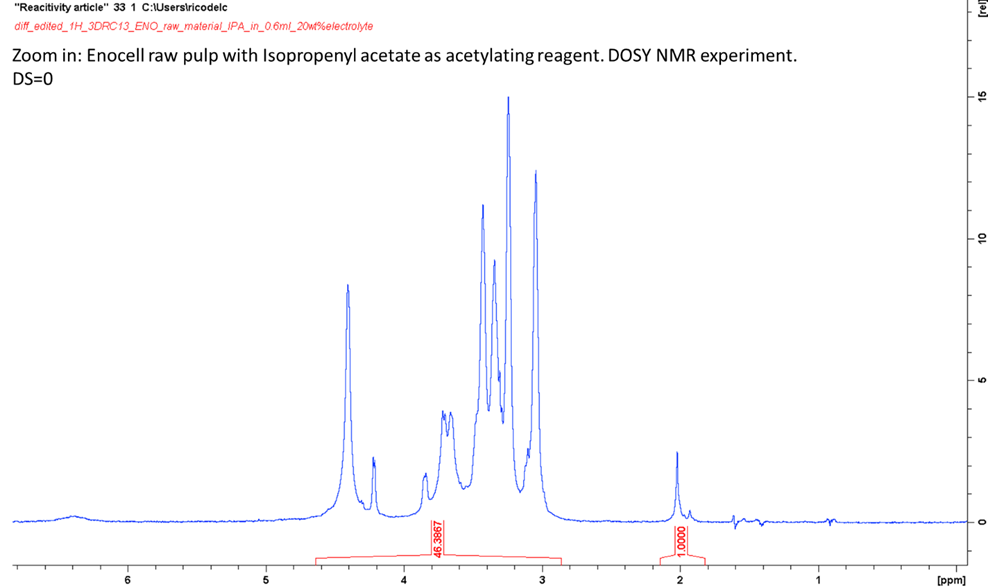


**Fig. S52** Expanded diffusion-edited 1H NMR spectrum of acetylated Enocell raw pulp with isopropenyl acetate as acetylating reagent.


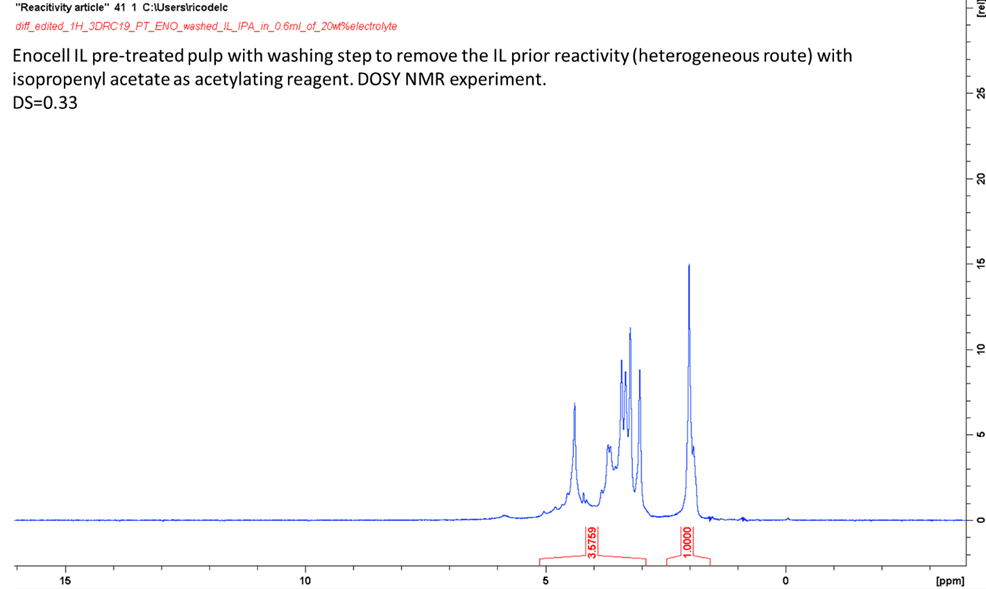


**Fig. S53** Diffusion-edited 1H NMR spectrum of acetylated Enocell IL pre-treated pulp with isopropenyl acetate as acetylating reagent, heterogeneous route.


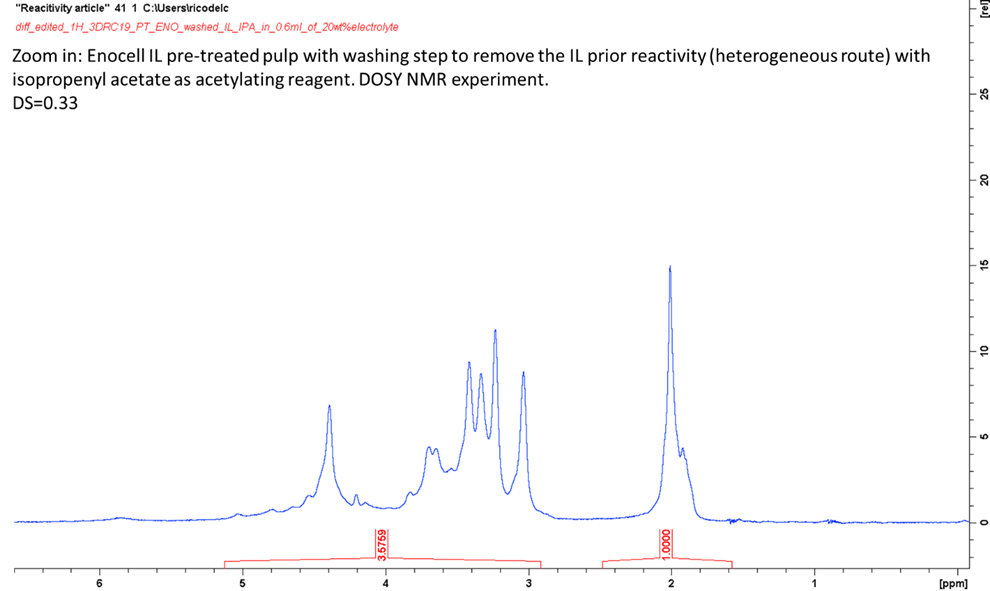


**Fig. S54** Expanded diffusion-edited 1H NMR spectrum of acetylated Enocell IL pre-treated pulp with isopropenyl acetate as acetylating reagent, heterogeneous route.


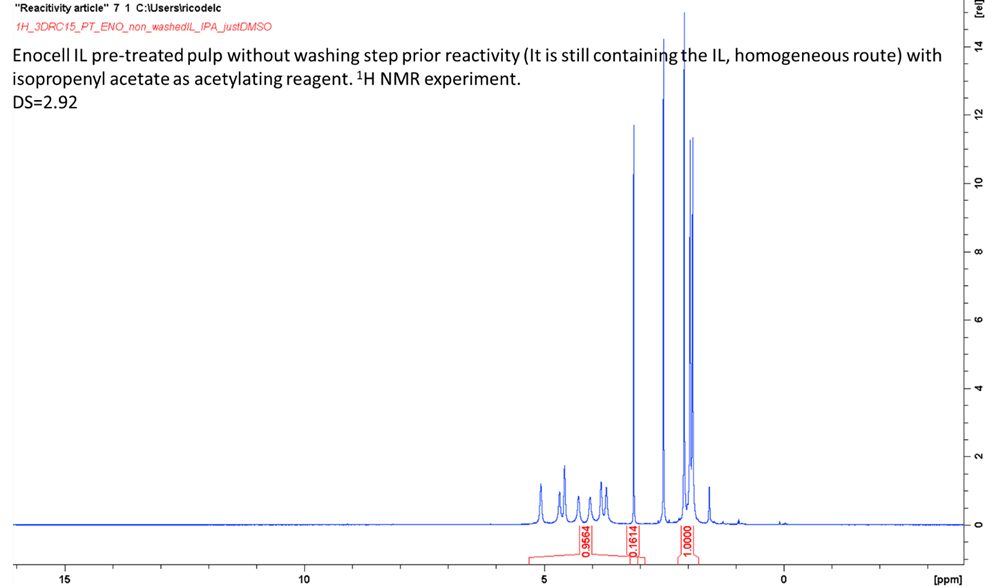


**Fig. S55** 1H NMR spectrum of acetylated Enocell IL pre-treated pulp with isopropenyl acetate as acetylating reagent, homogeneous route.


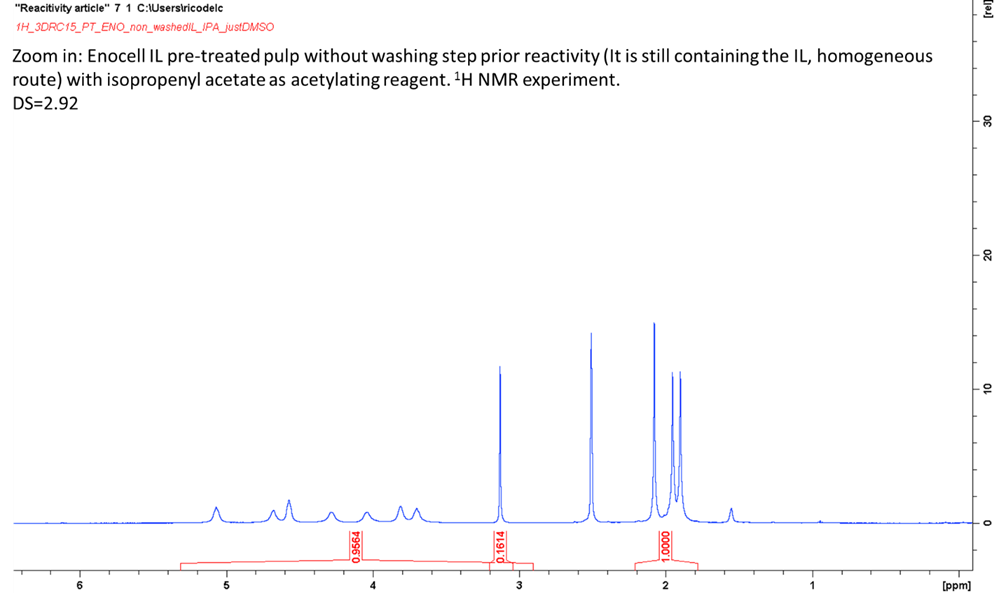


**Fig. S56** Expanded 1H NMR spectrum of acetylated Enocell IL pre-treated pulp with isopropenyl acetate as acetylating reagent, homogeneous route.


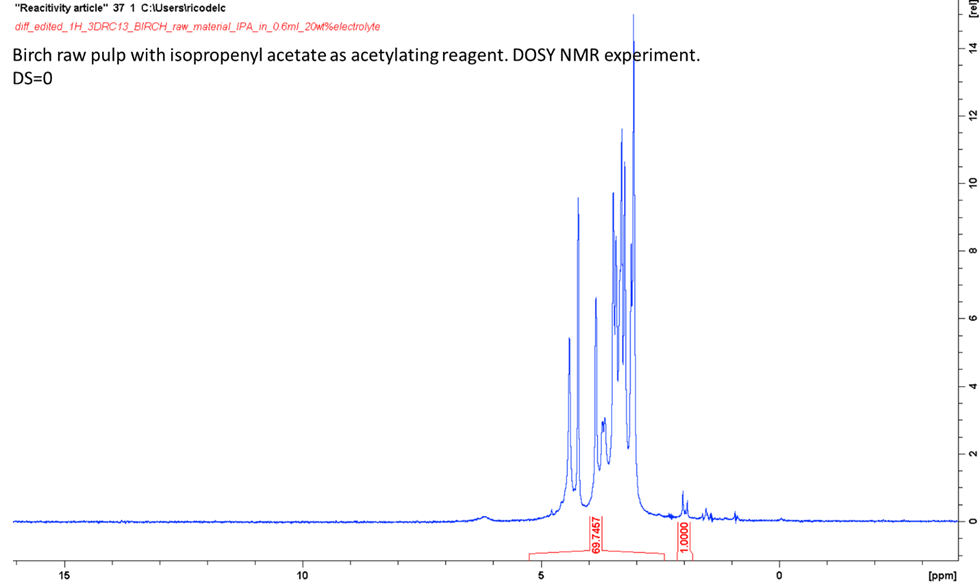


**Fig. S57** Diffusion-edited 1H NMR spectrum of acetylated Birch raw pulp with isopropenyl acetate as acetylating reagent.


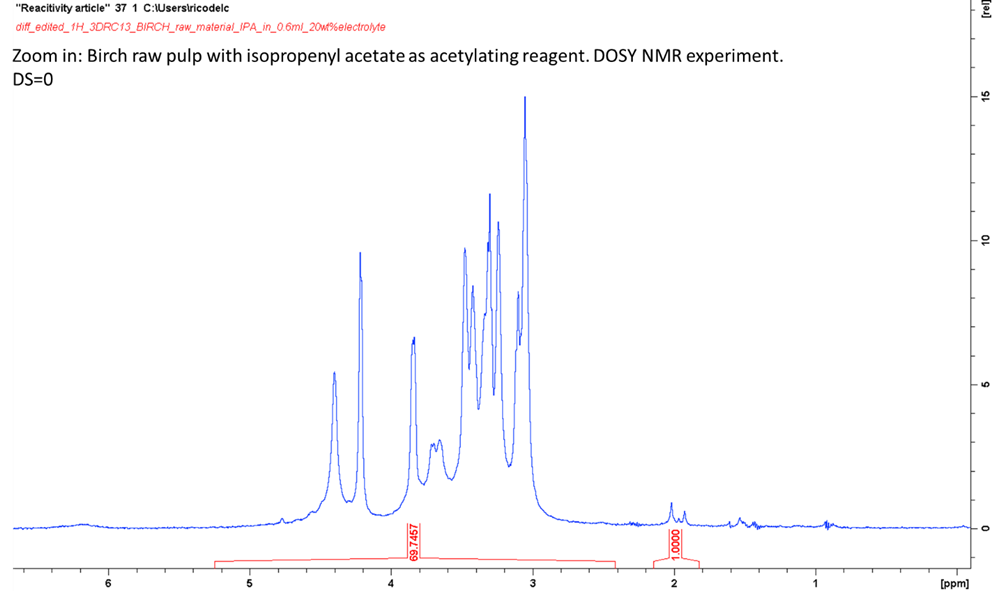


**Fig. S58** Expanded diffusion-edited 1H NMR spectrum of acetylated Birch raw pulp with isopropenyl acetate as acetylating reagent.


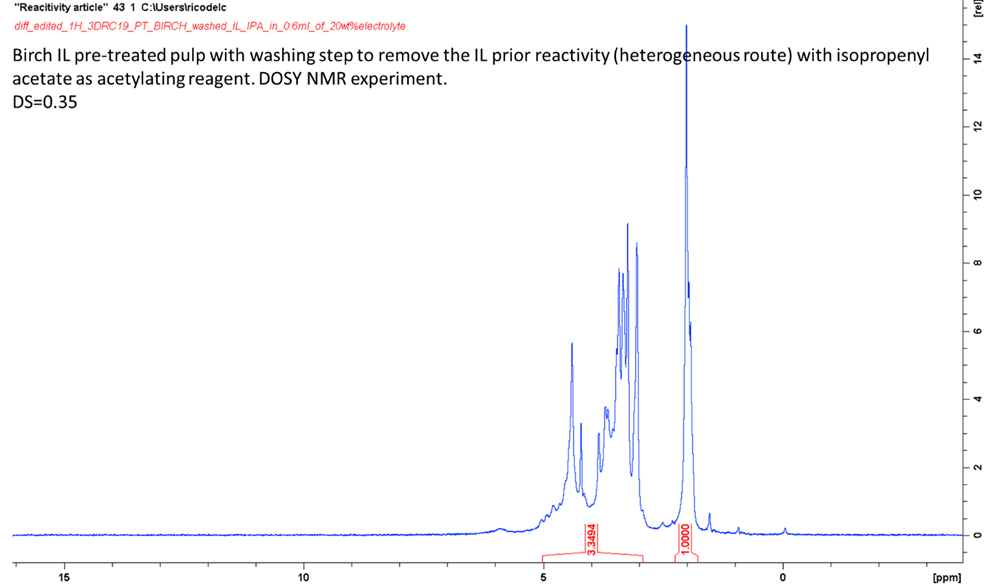


**Fig. S59** Diffusion-edited 1H NMR spectrum of acetylated Birch IL pre-treated pulp with isopropenyl acetate as acetylating reagent, heterogeneous route.


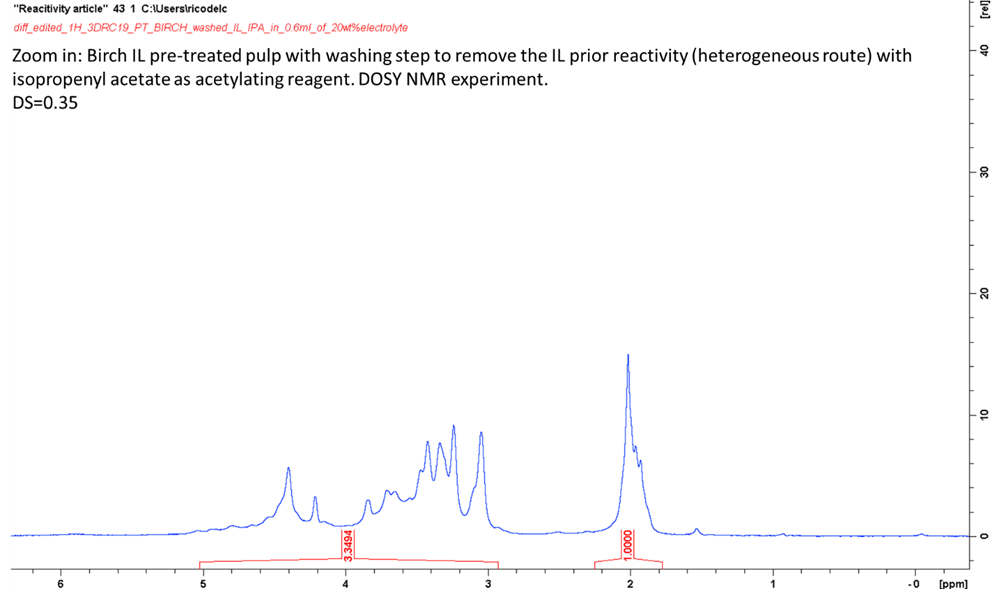


**Fig. S60** Expanded diffusion-edited 1H NMR spectrum of acetylated Birch IL pre-treated pulp with isopropenyl acetate as acetylating reagent, heterogeneous route.


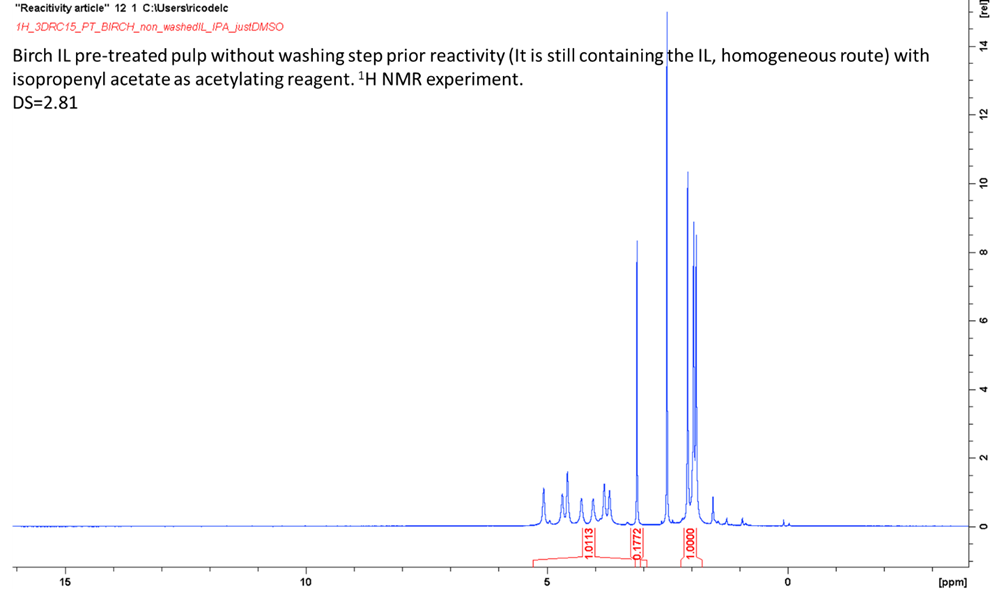


**Fig. S61** 1H NMR spectrum of acetylated Birch IL pre-treated pulp with isopropenyl acetate as acetylating reagent, homogeneous route.


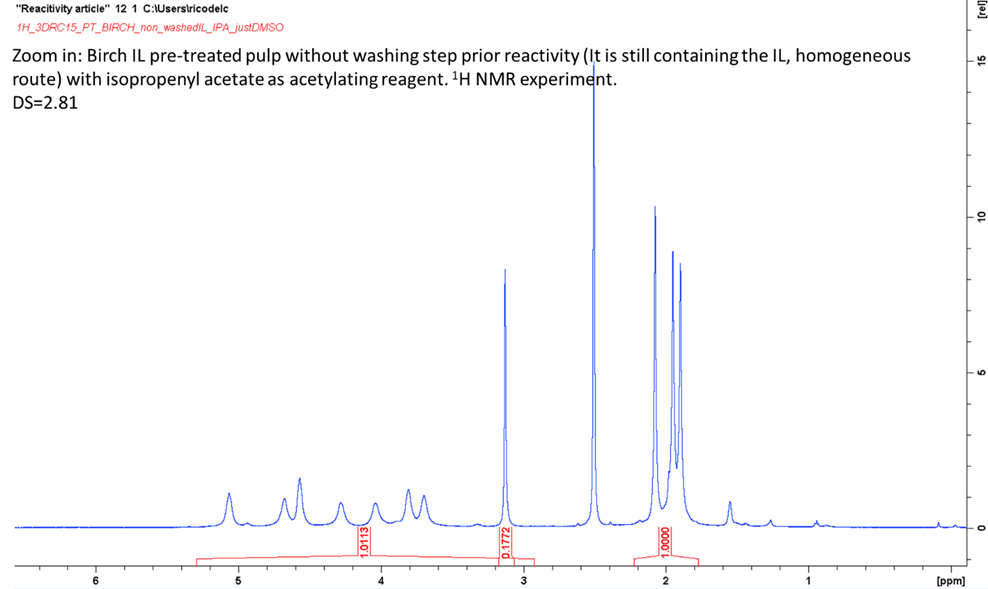


**Fig. S62** Expanded 1H NMR spectrum of acetylated Birch IL pre-treated pulp with isopropenyl acetate as acetylating reagent, homogeneous route.


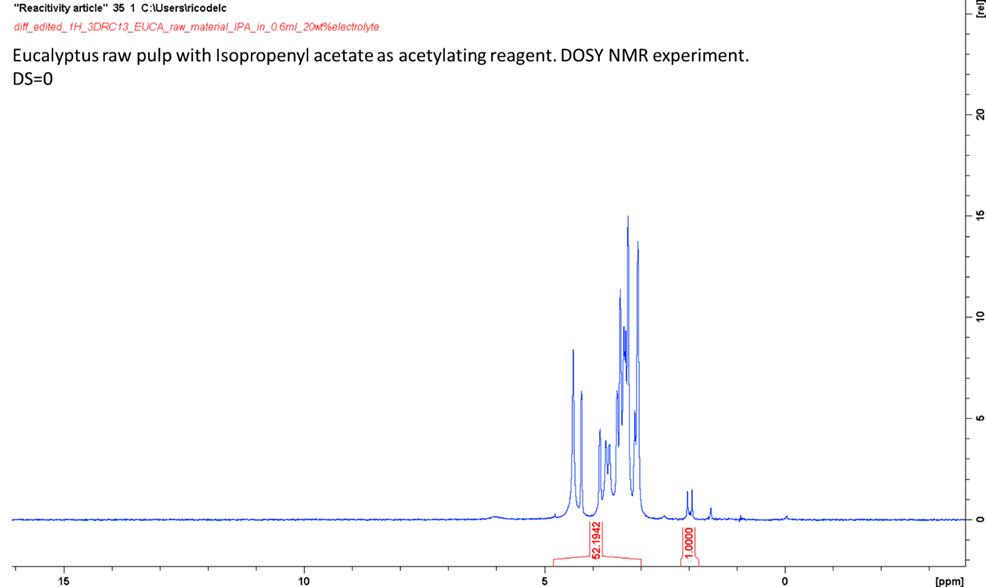


**Fig. S63** Diffusion-edited 1H NMR spectrum of acetylated Eucalyptus raw pulp with isopropenyl acetate as acetylating reagent.


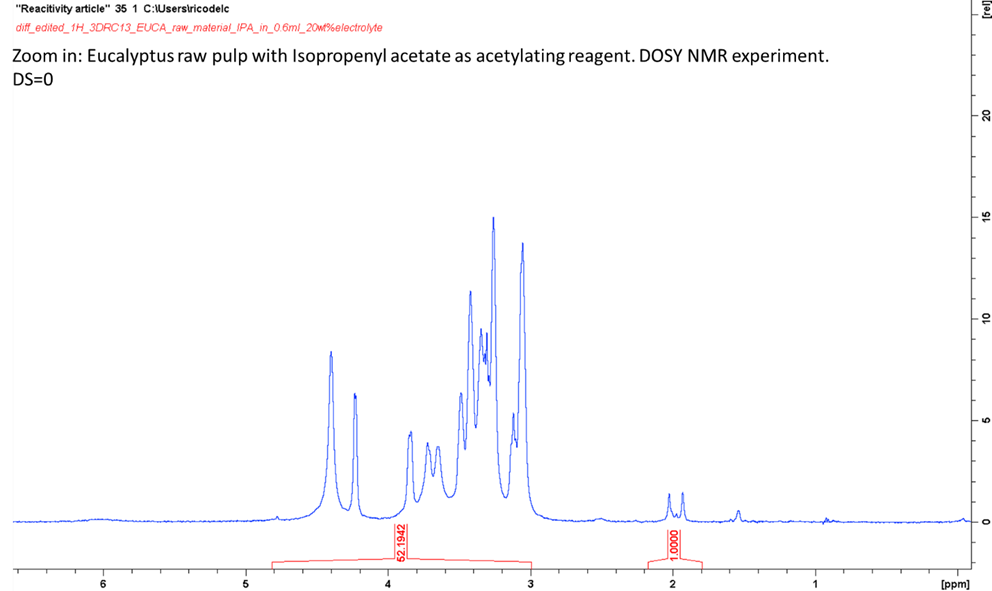


**Fig. S64** Expanded diffusion-edited 1H NMR pectrum of acetylated Eucalyptus raw pulp with isopropenyl acetate as acetylating reagent.


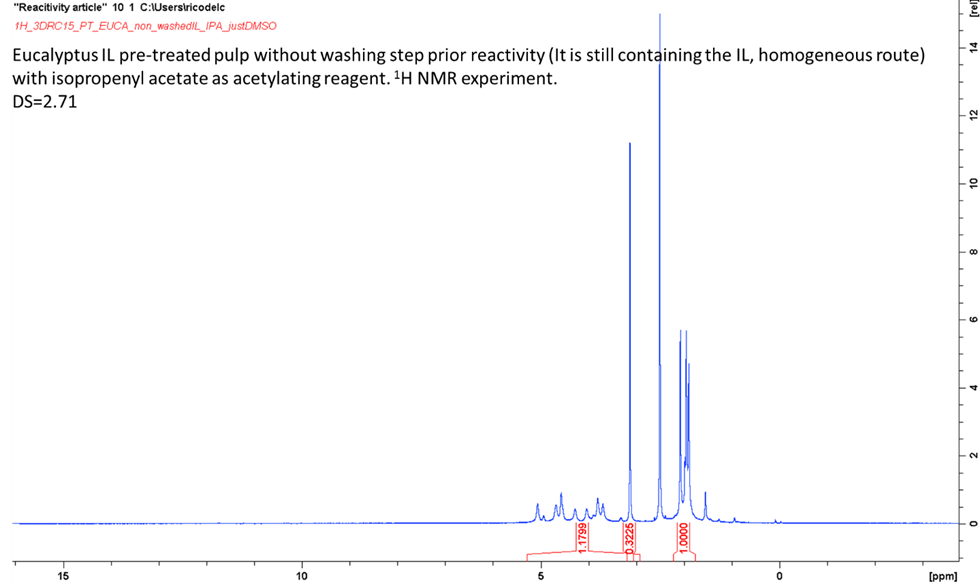


**Fig. S65** 1H NMR spectrum of acetylated Eucalyptus IL pre-treated pulp with isopropenyl acetate as acetylating reagent, homogeneous route.


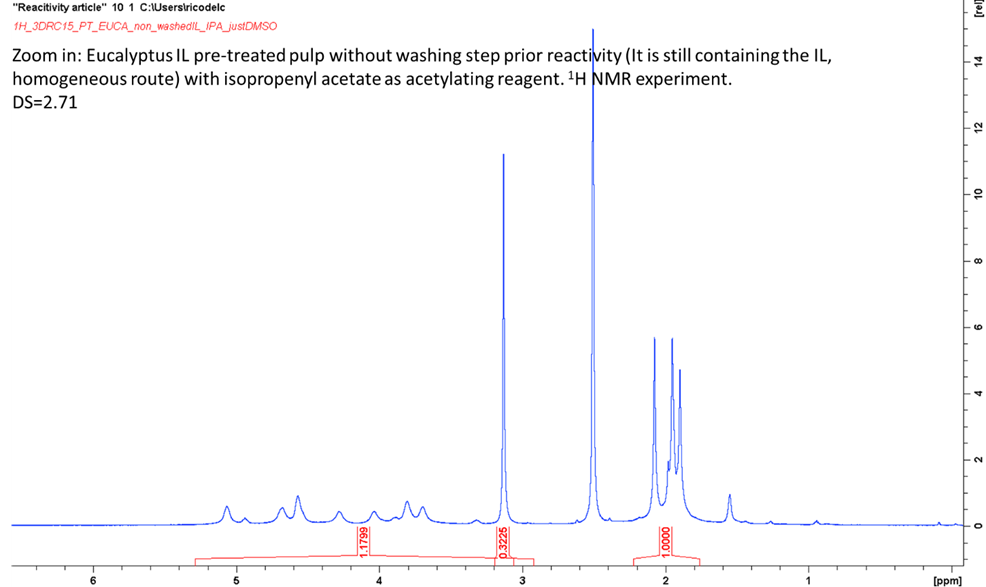


**Fig. S66** Expanded 1H NMR spectrum of acetylated Eucalyptus IL pre-treated pulp with isopropenyl acetate as acetylating reagent, homogeneous route.

## **e) ATR-IR analysis of acetylated samples**

### i) Description

The relative degrees of acetylation for each sample were determined by deconvolution of the ATR-IR data. Deconvolution was performed on the baseline corrected data. Peak areas were determined from the areas of combined Gaussian functions applied to the data in *‘Fityk’ for the* C=O bands (1500-1800 cm-1) and for the cellulose backbone C-O stretches (700-1200 cm-1). Voight functions were applied where the peak maxima lie within the above ranges (**Figure S67**). The C=O region typically required a maximum of 3 Voight functions for accurate fitting. The C-O region typically required ~4 Voight functions for accurate fitting. The ATR-IR ratios where then calculated by dividing the sum of the C=O peak areas by the sum of the C-O peak areas.

The DS values obtained from the NMR data were compared with the ratio of the deconvoluted carbonyl absorption band (CO) and the deconvoluted cellulose backbone absorption band (C-O-C) of the ATR-IR data. The mentioned ratio (CO/C-O-C) is shown in **table** **S4**.


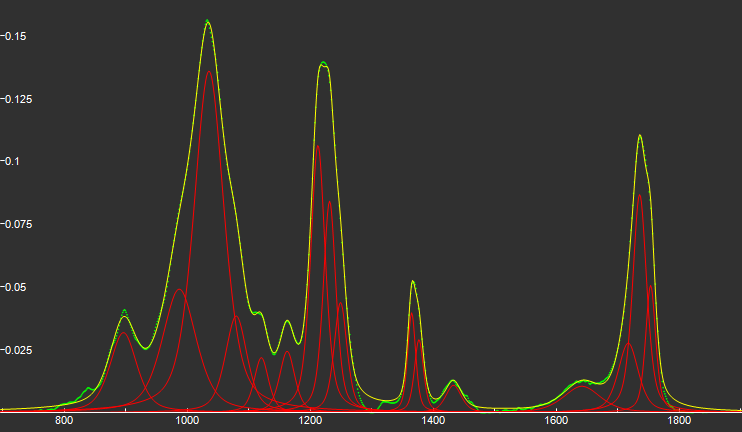


**Fig. S67** Voight functions applied for deconvolution of the baseline-corrected ATR-IR data of the acetylated samples.

**Table S4.** ATR-IR ratios from the deconvoluted carbonyl absorption band (CO) vs cellulose backbone absorption band (C-O-C).

| Pulp and treatment | Acetylating reagent | ATR-IR ratio (CO / C-O-C)[a] |
| --- | --- | --- |
| Enocell untreated Pulp | Acetic anhydride | 0.11 |
| Enocell IL-PT-W[b] | 0.35 |
| Enocell IL-PT-NW[c] | 0.43 |
| Birch Untreated Pulp | 0.12 |
| Birch IL-PT-W[b] | 0.30 |
| Birch IL-PT-NW[c] | 0.47 |
| Eucalyptus Untreated Pulp | 0.17 |
| Eucalyptus IL-PT-W[b] | 0.14 |
| Eucalyptus IL-PT-NW[c] | 0.45 |
| Enocell Untreated Pulp | Isopropenyl acetate | 0.05 |
| Enocell IL-PT-W[b] | 0.16 |
| Enocell IL-PT-NW[c] | 0.39 |
| Birch Untreated Pulp | 0.15 |
| Birch IL-PT-W[b] | 0.22 |
| Birch IL-PT-NW[c] | 0.44 |
| Eucalyptus Untreated Pulp | 0.06 |
| Eucalyptus IL-PT-NW[c] | 0.46 |

[a] ATR-IR carbonyl band (CO) and cellulose backbone band(C-O-C) ratio. [b] IL-PT-W=IL pre-treated pulp with a further washing step to remove the IL before the addition of the acetylating reagent (heterogeneous route). [c] IL-PT-NW=IL pre-treated pulp non-washed, where the IL still present in the reactivity, what allows dissolution of the pulp prior addition of the acetylating reagent (homogeneous route).

The DS values from the NMR integration method show a good correlation with the ATR-IR absorbance ratios, as shown in **figure S68** (**figure 4** in main text). The mentioned correlation is shown to be consistent with the pre-treatment, type of pulps used and the acetylating agent.


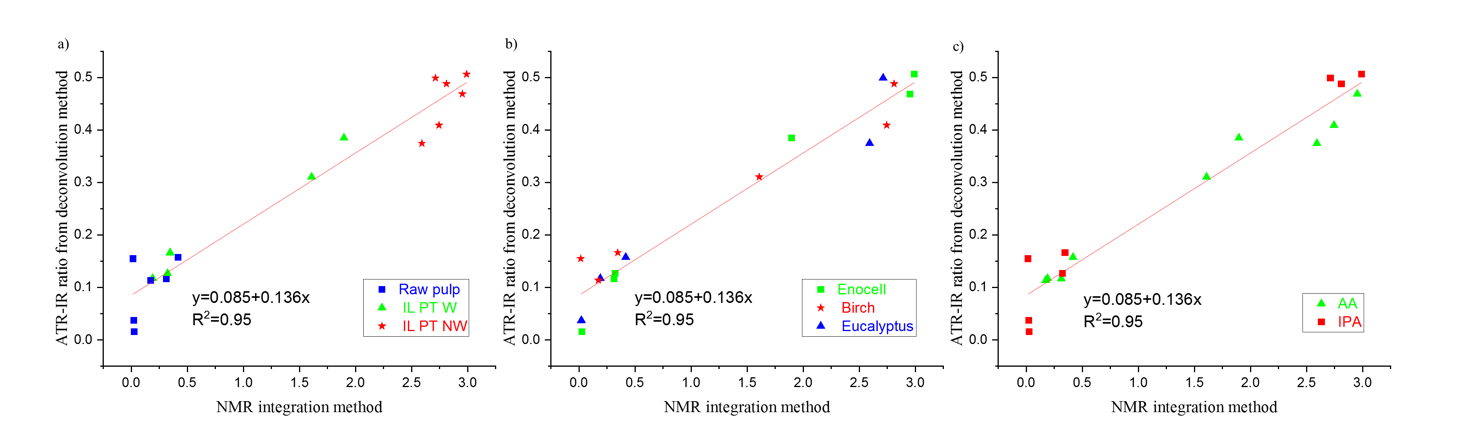


**Fig. S68** Linear correlation of DS values using the 1H NMR integration methods and ATR-IR ratios from the deconvolution method. Data points/samples are separated into: a) the pre-treatment type, b) the pulp origin c) the acetylation reagent applied. ‘IL-PT-W’=IL pre-treated pulp with a further washing step to remove the IL before the addition of the acetylating reagent (heterogeneous route) and ‘IL-PT-NW=IL pre-treated pulp non-washed, which still containing the IL, dissolving the pulp prior reactivity (homogeneous route).

### ii) ATR-IR data


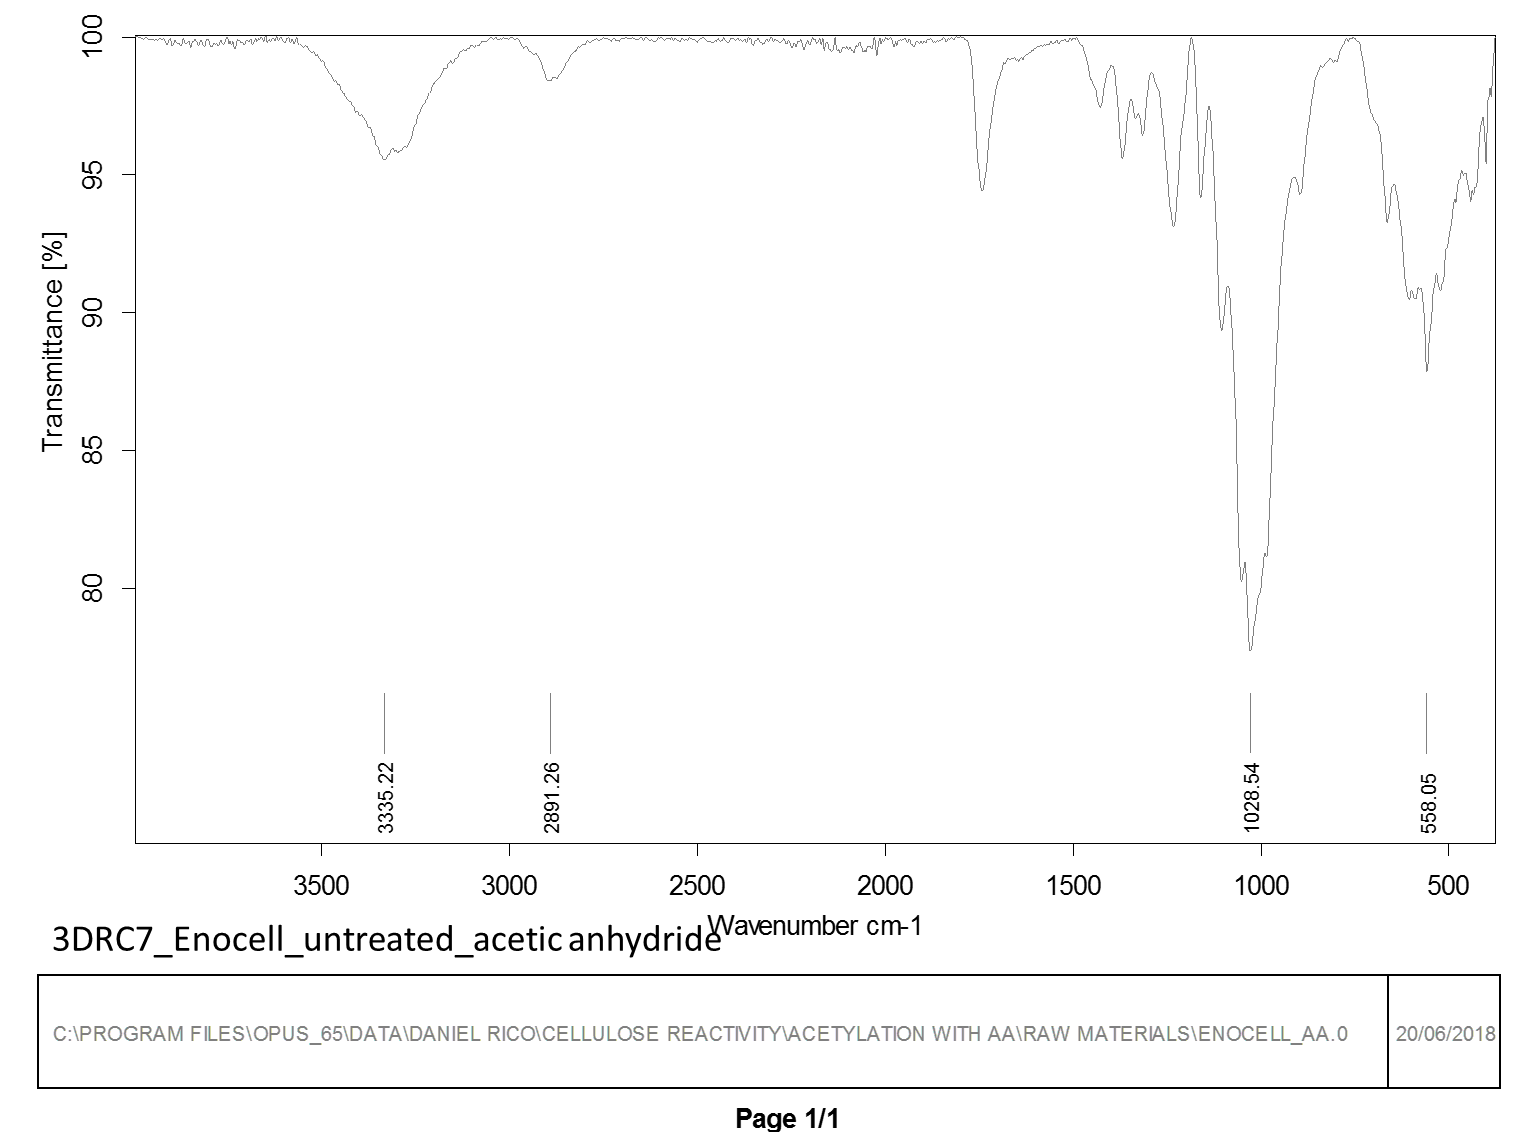


**Fig. S69**AFT-IR spectrum of Enocell untreated pulp acetylated acetic anhydride.


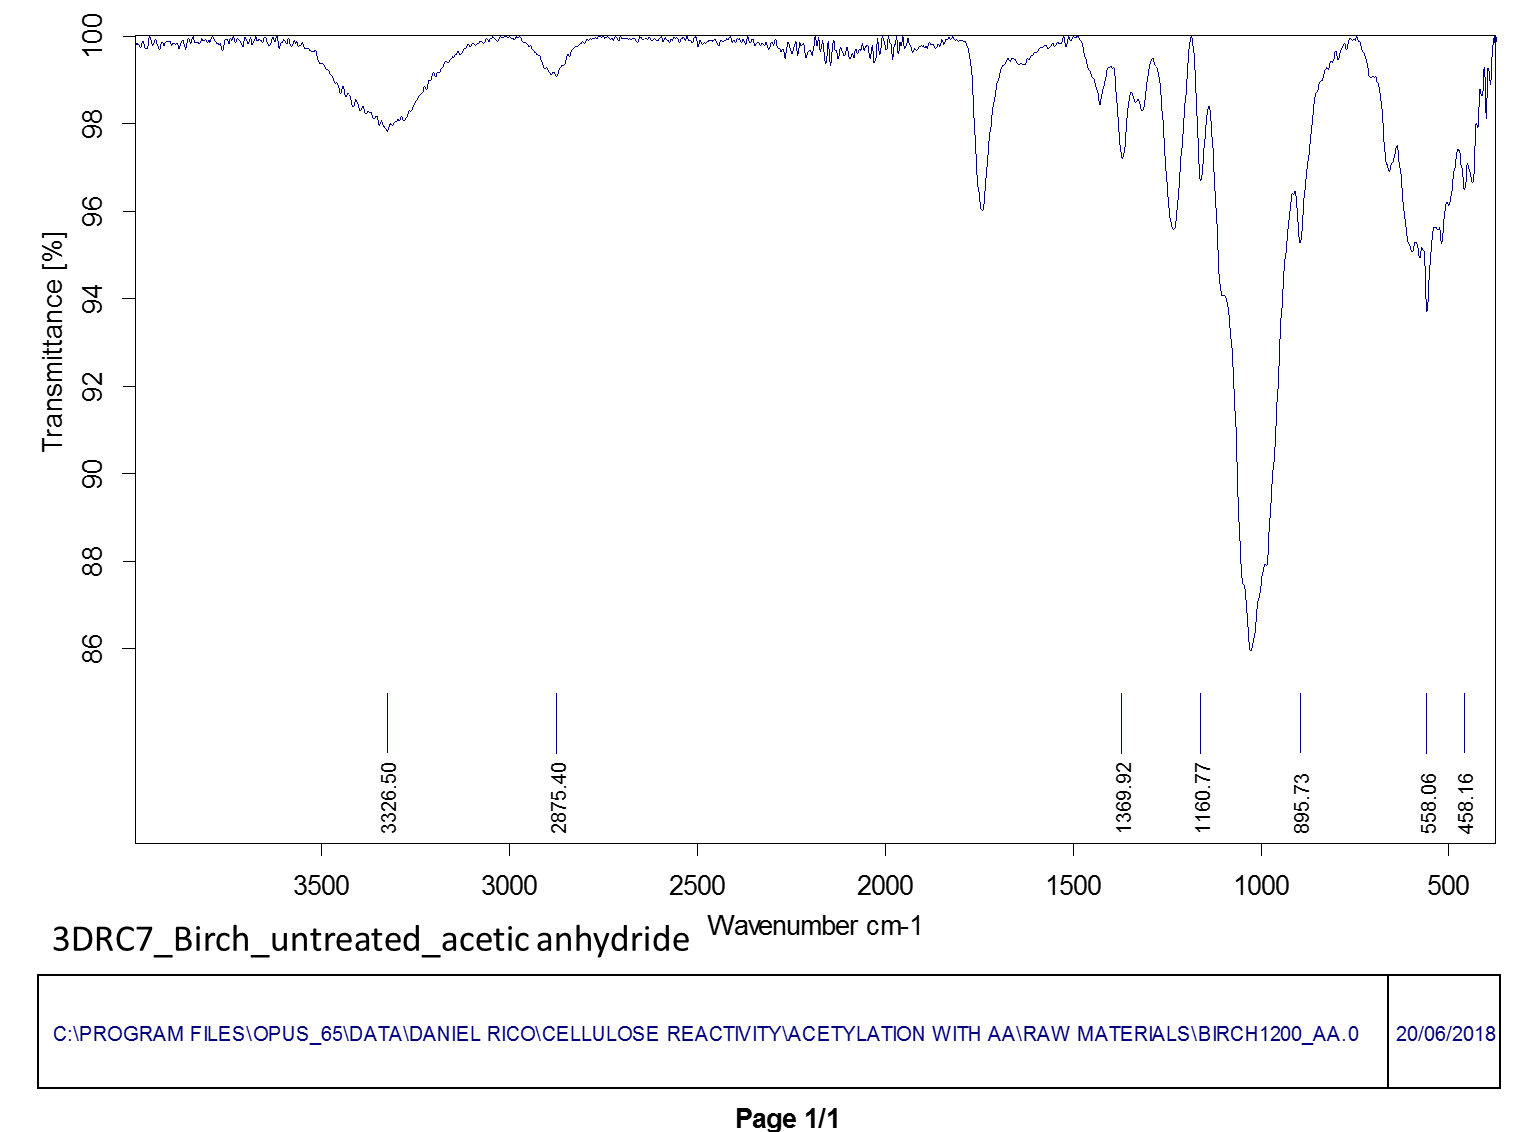


**Fig. S70**AFT-IR spectrum of birch untreated pulp acetylated with acetic anhydride.


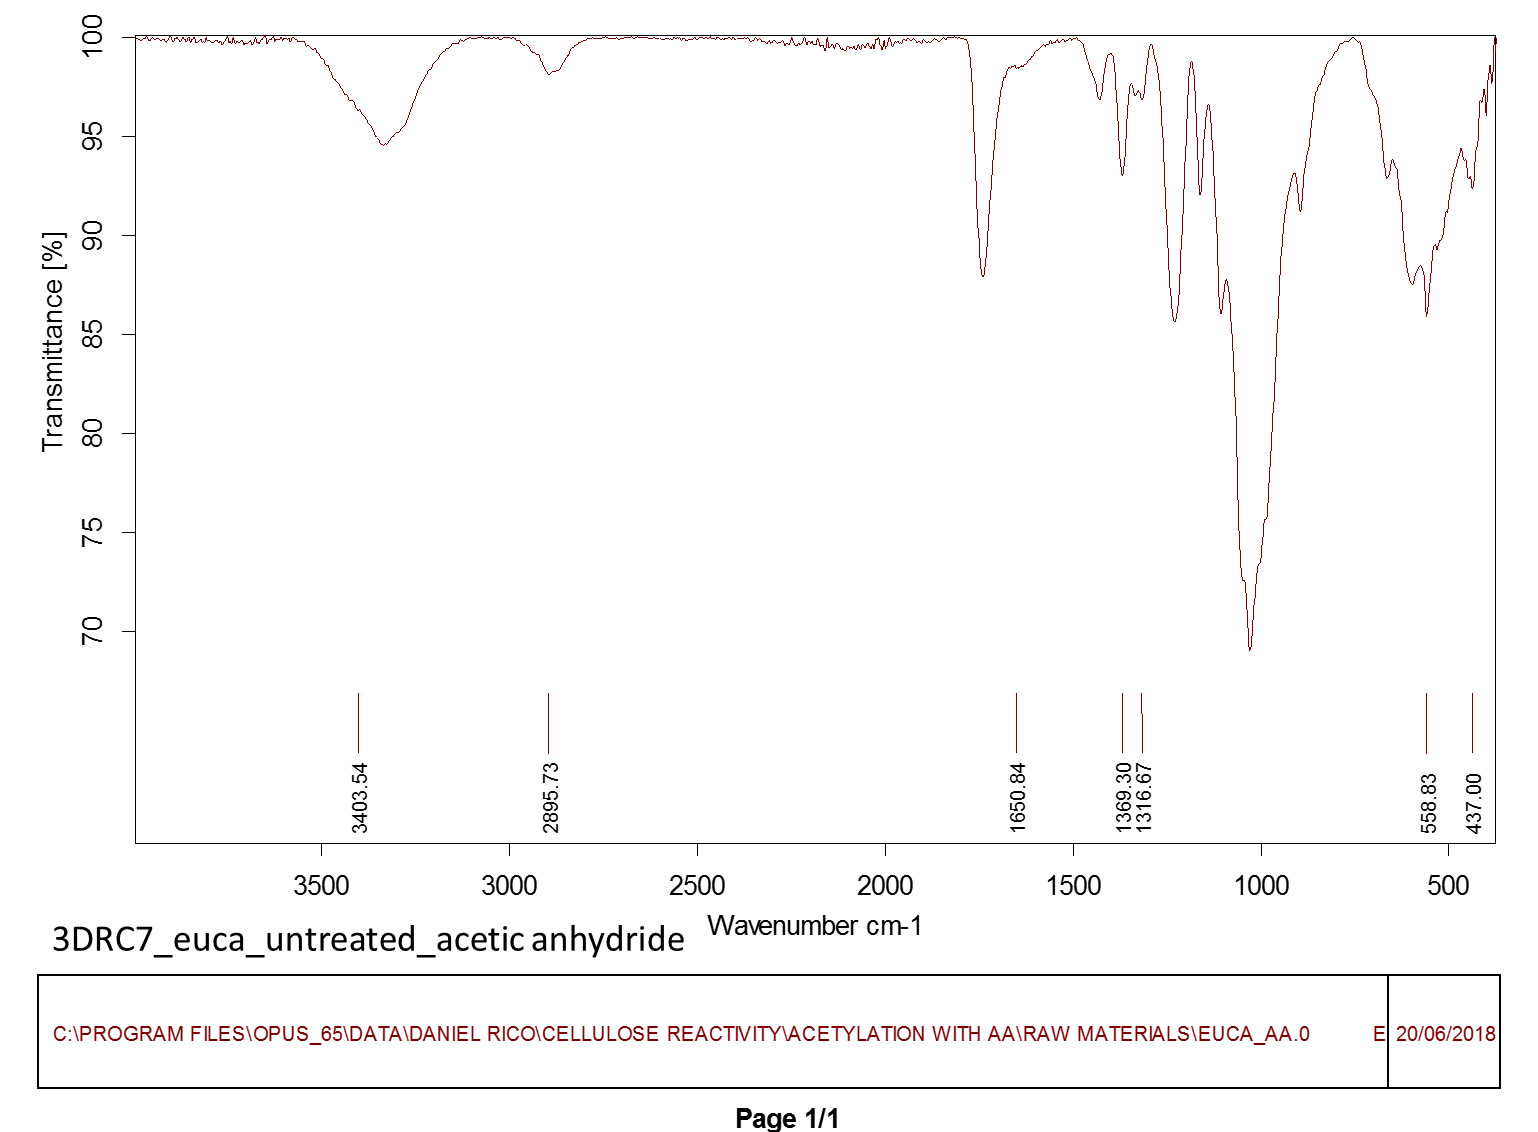


**Fig. S71**AFT-IR spectrum of eucalyptus untreated pulp acetylated with acetic anhydride.


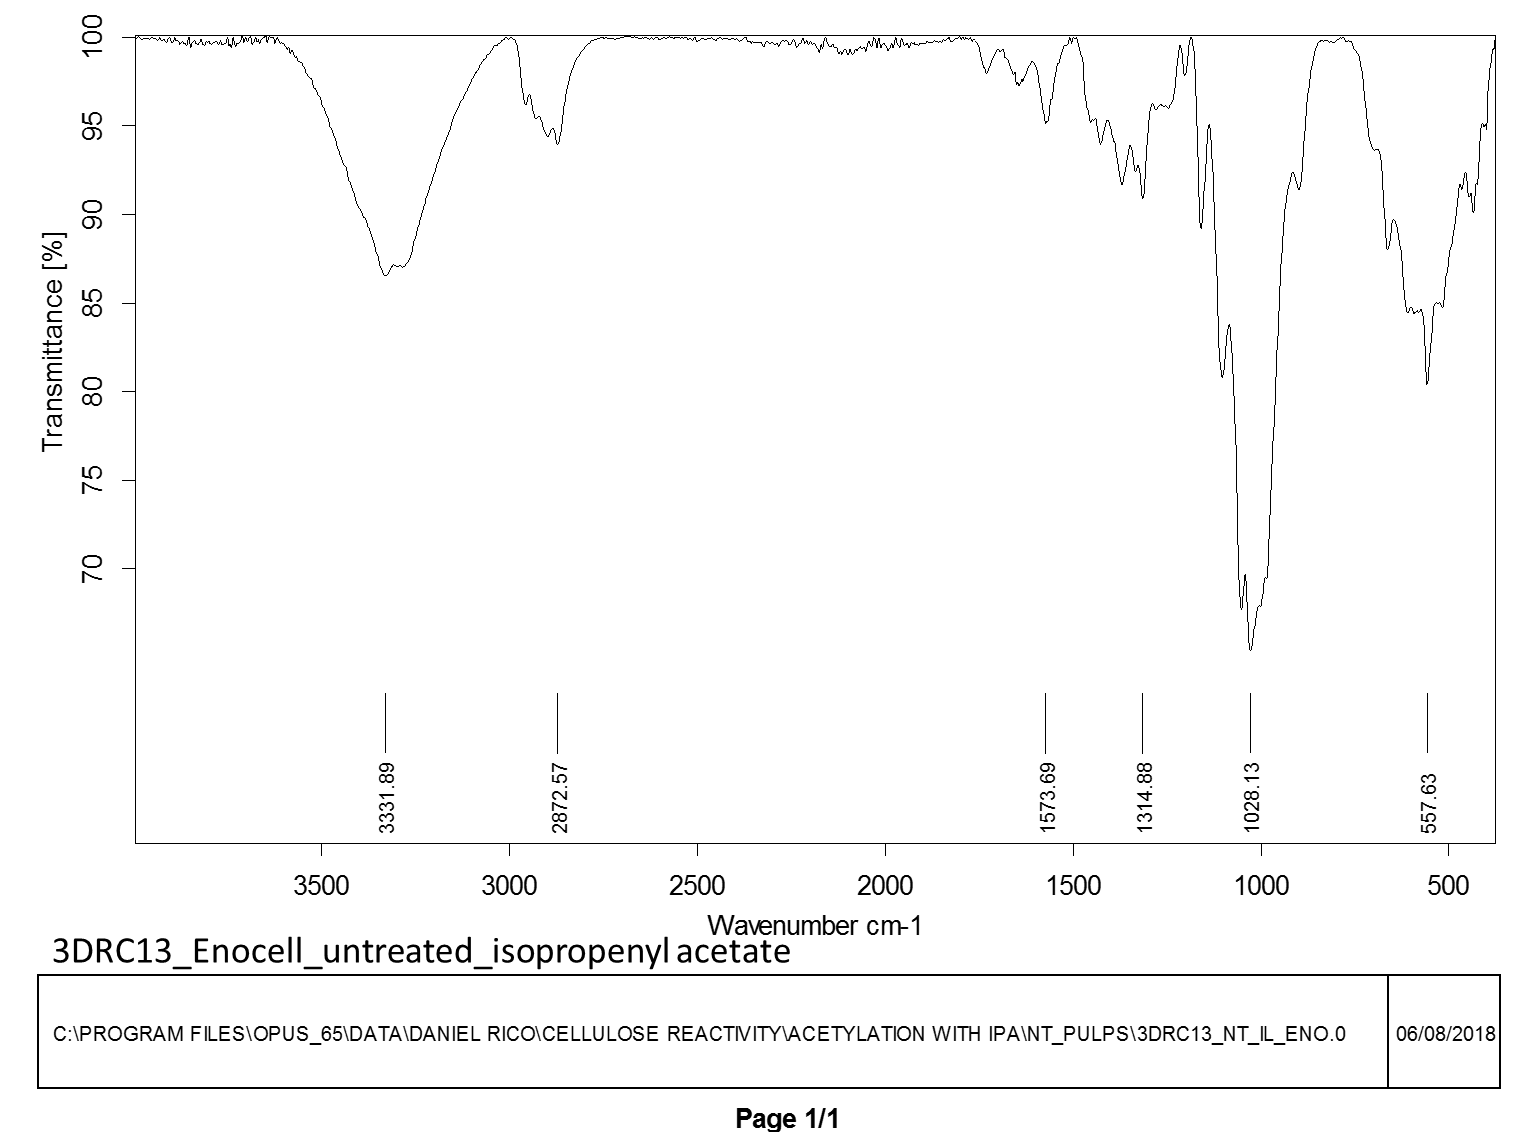


**Fig. S72**AFT-IR spectrum of Enocell untreated pulp acetylated with isopropenyl acetate.


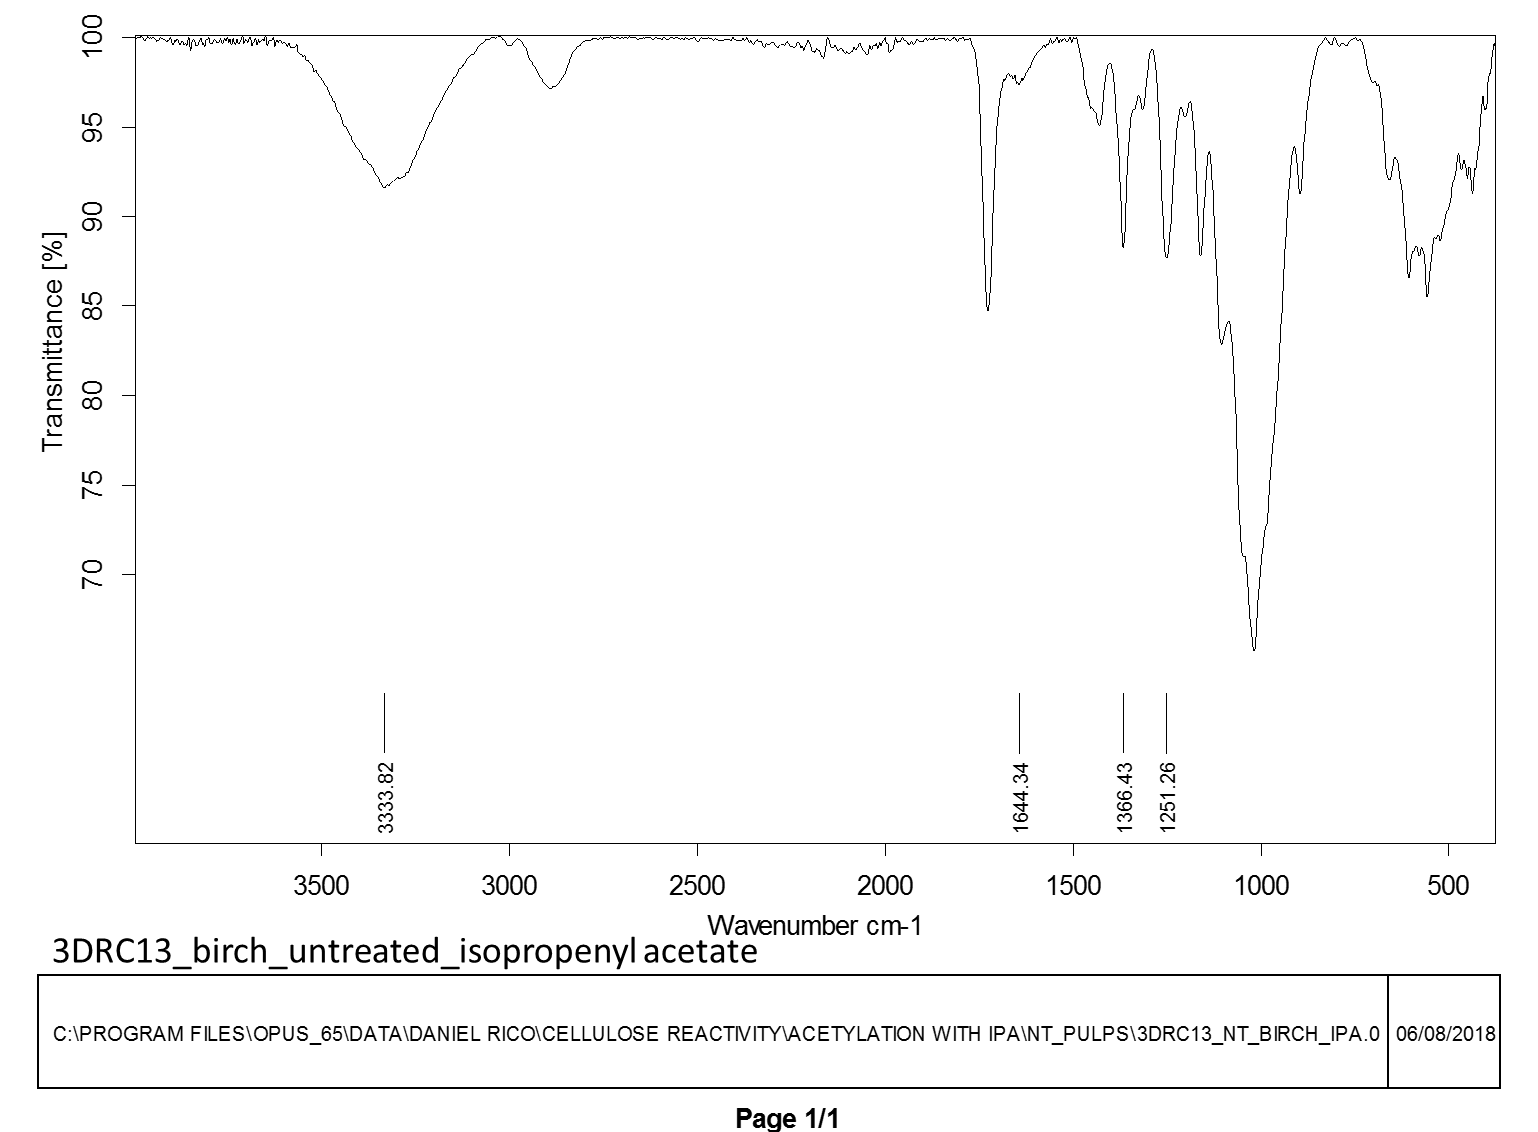


**Fig. S73**AFT-IR spectrum of birch untreated pulp acetylated with isopropenyl acetate.


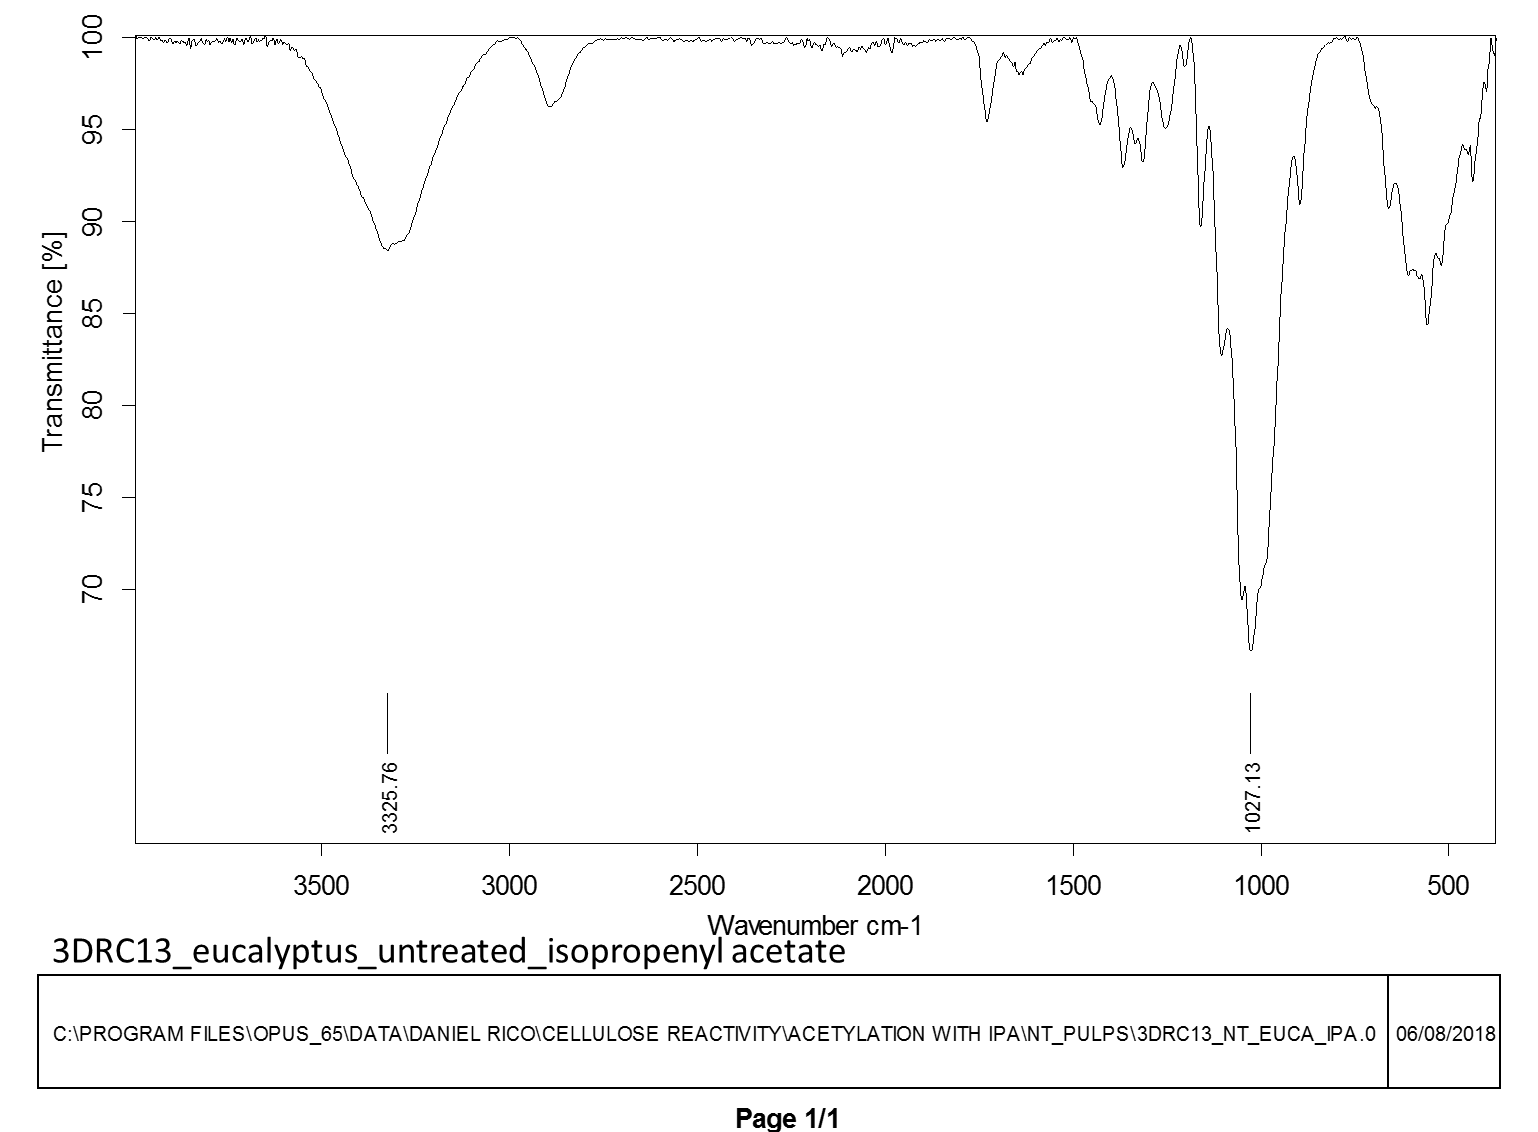


**Fig. S74**AFT-IR spectrum of eucalyptus untreated pulp acetylated with isopropenyl acetate.


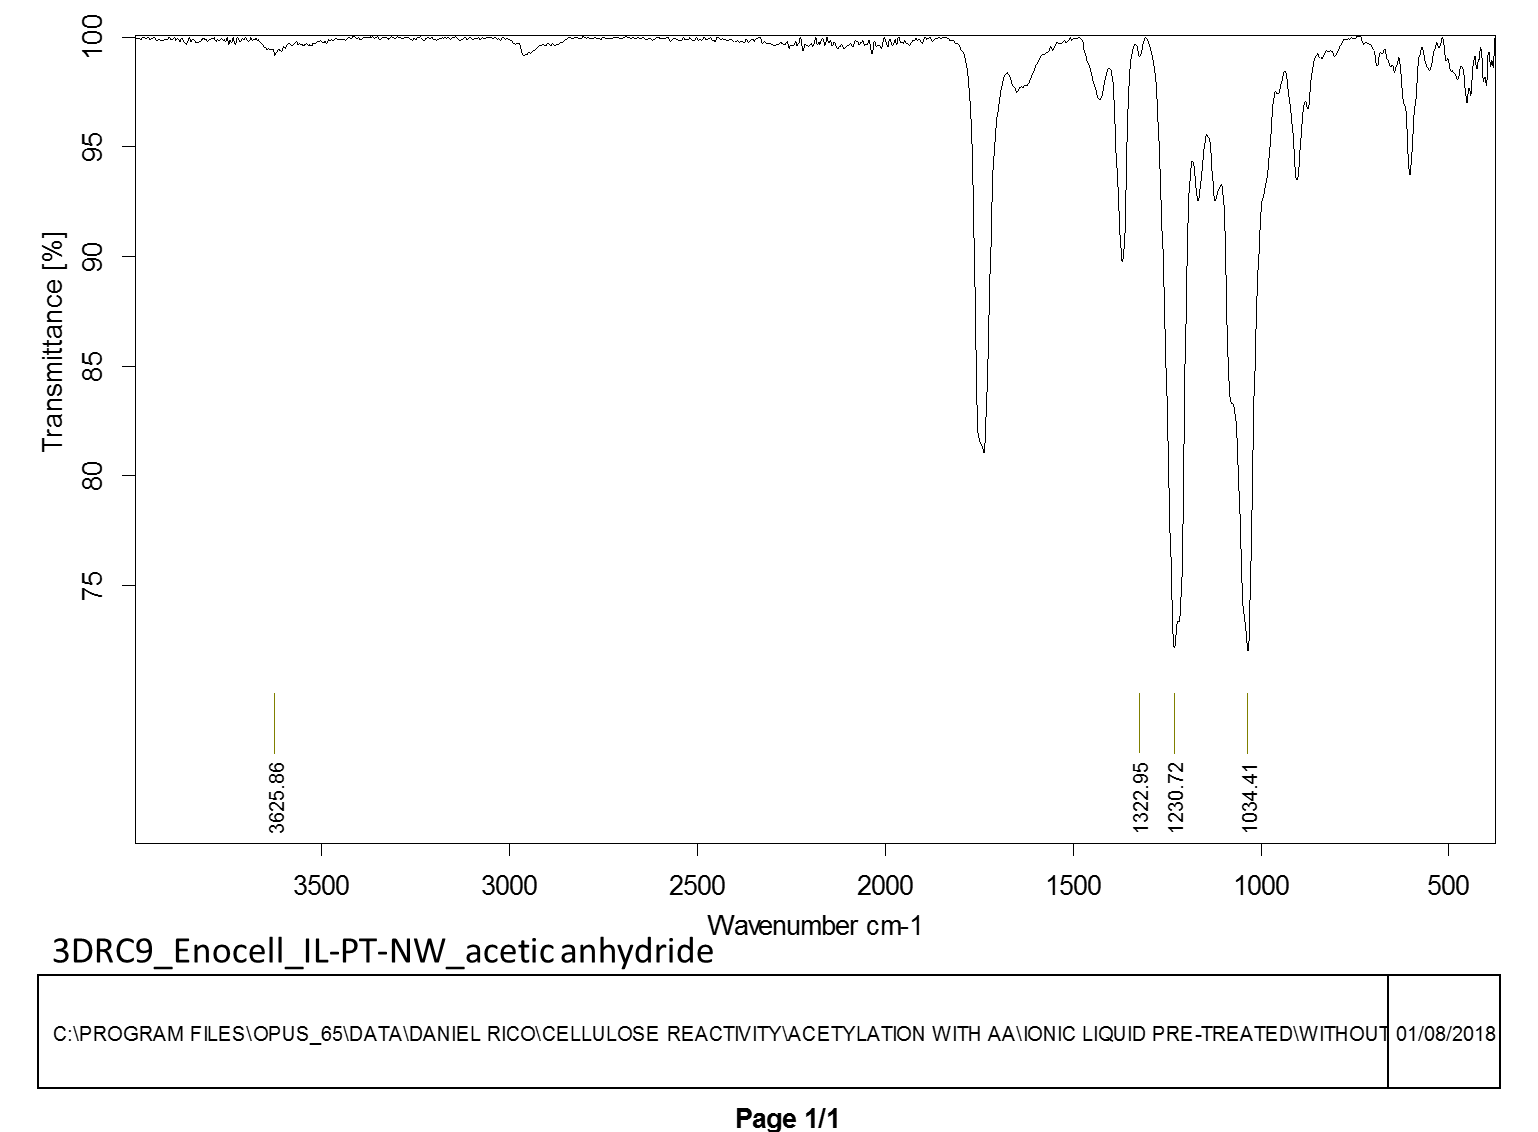


**Fig. S75**AFT-IR spectrum of Enocell IL-PT-NW acetylated with acetic anhydride.


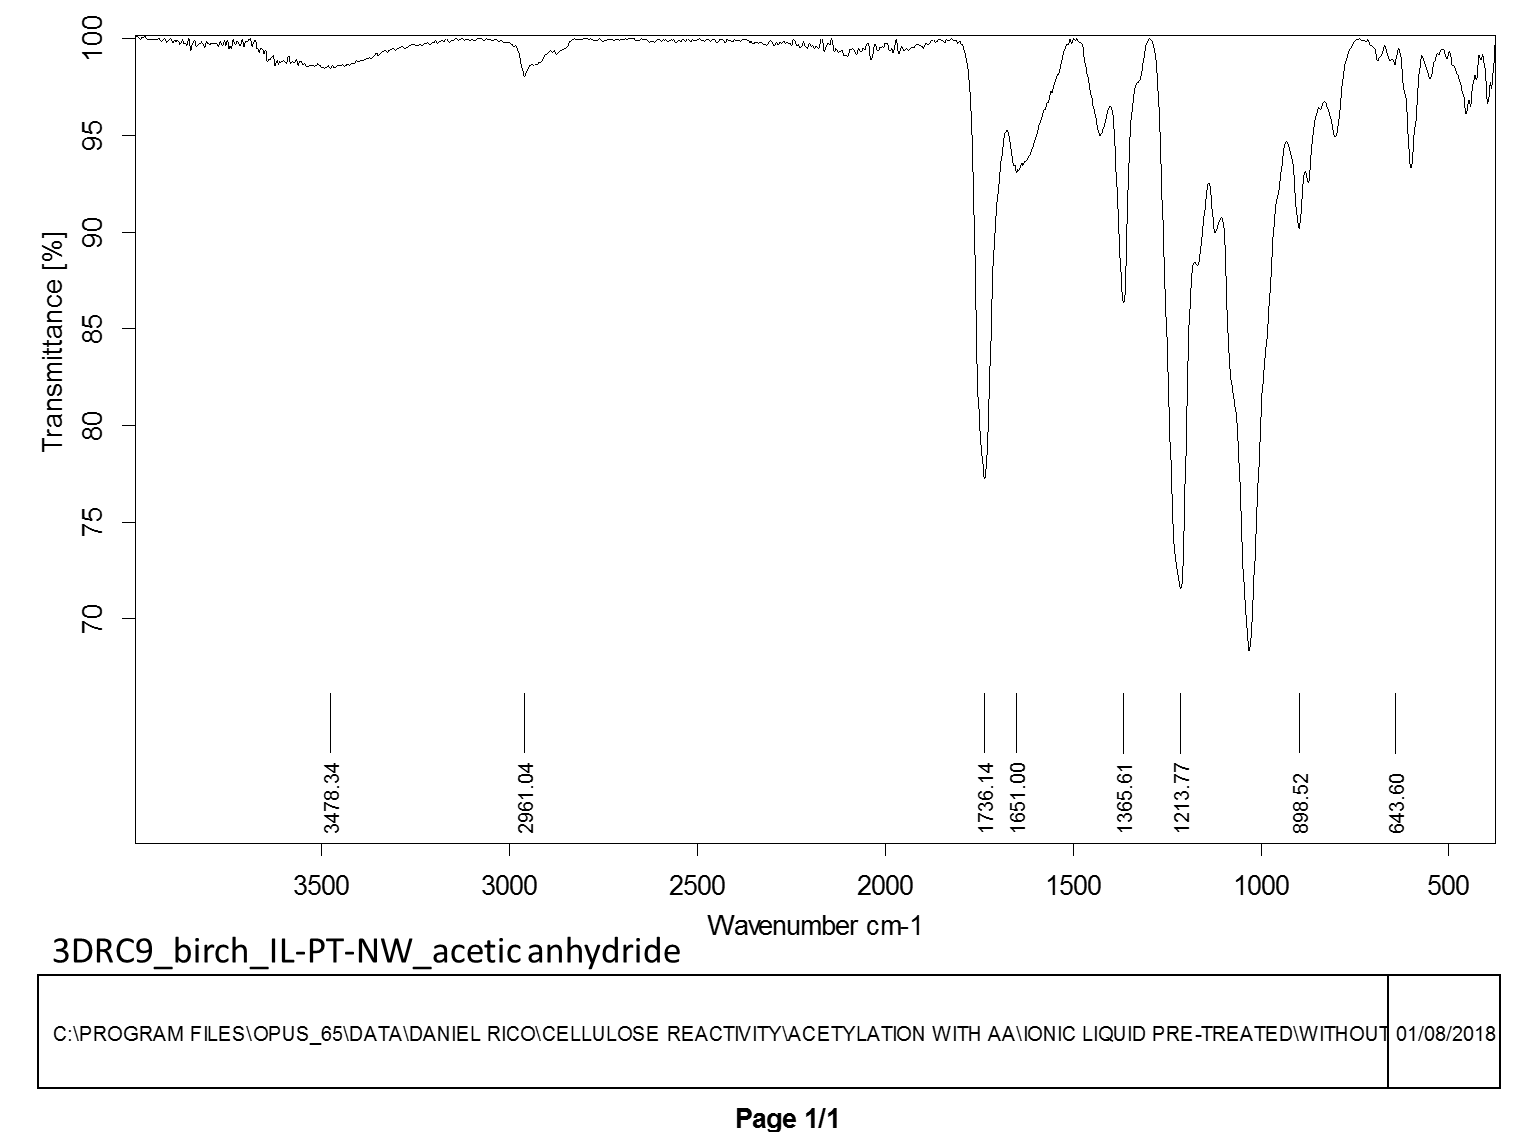


**Fig. S76** AFT-IR spectrum of birch IL-PT-NW acetylated with acetic anhydride.


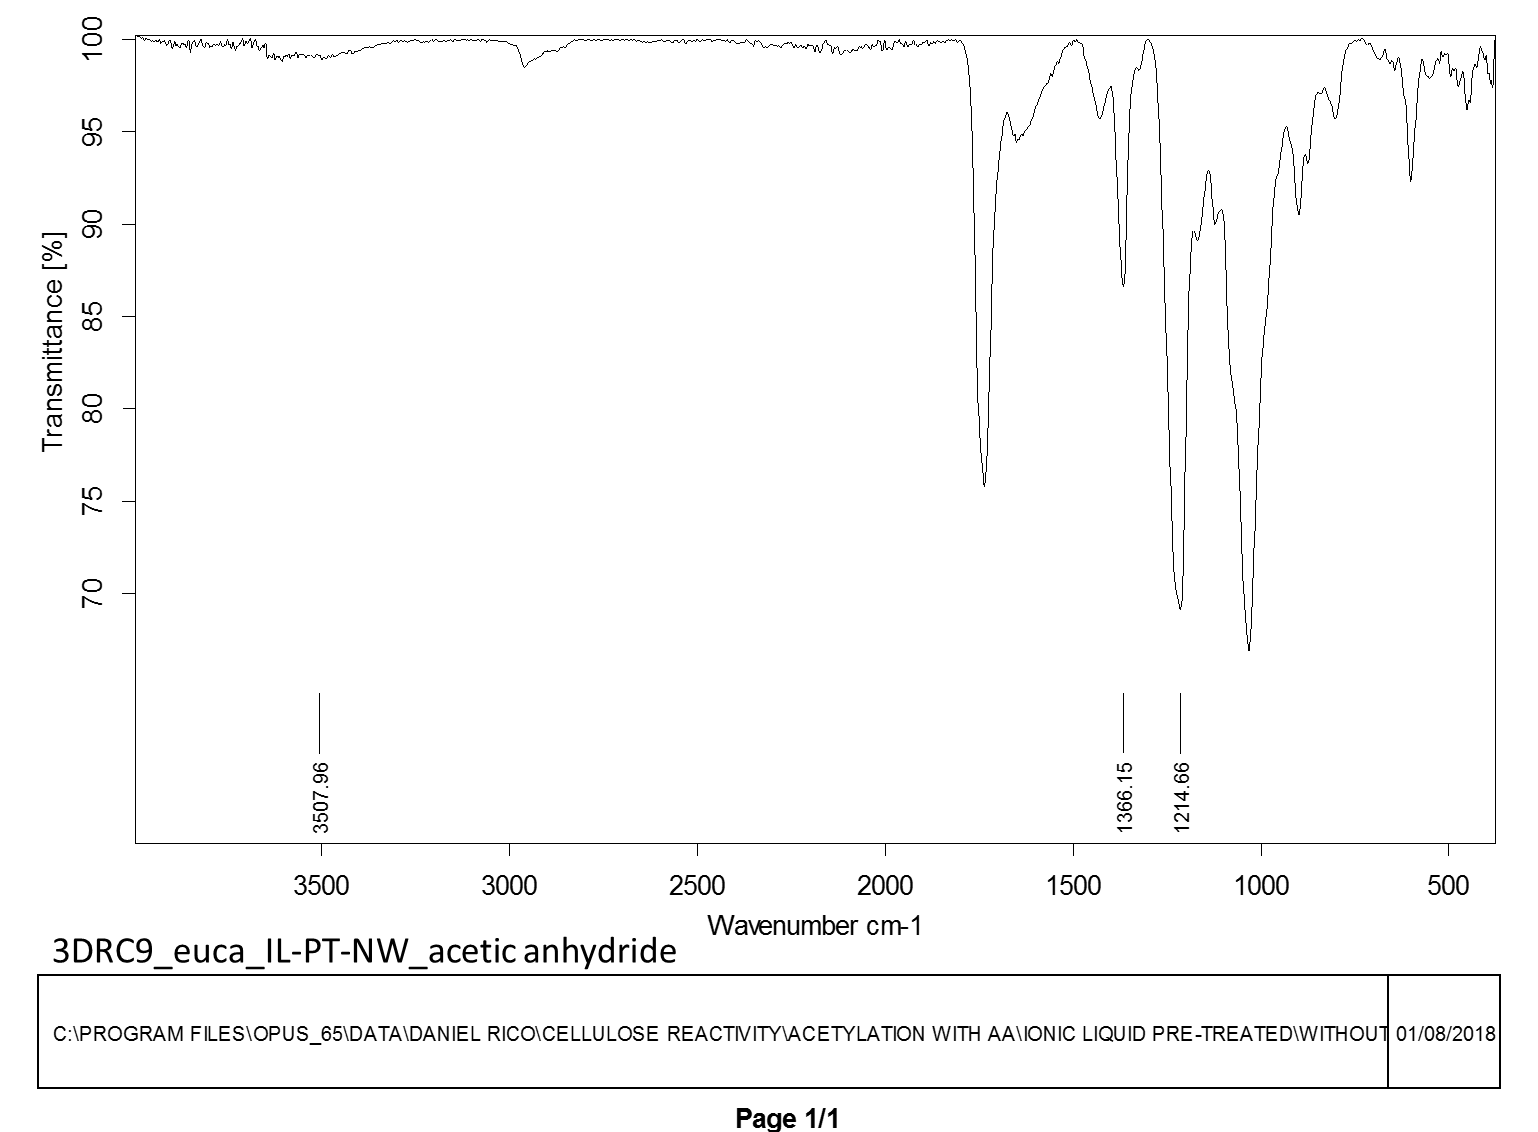


**Fig. S77** AFT-IR spectrum of eucalyptus IL-PT-NW acetylated with acetic anhydride.


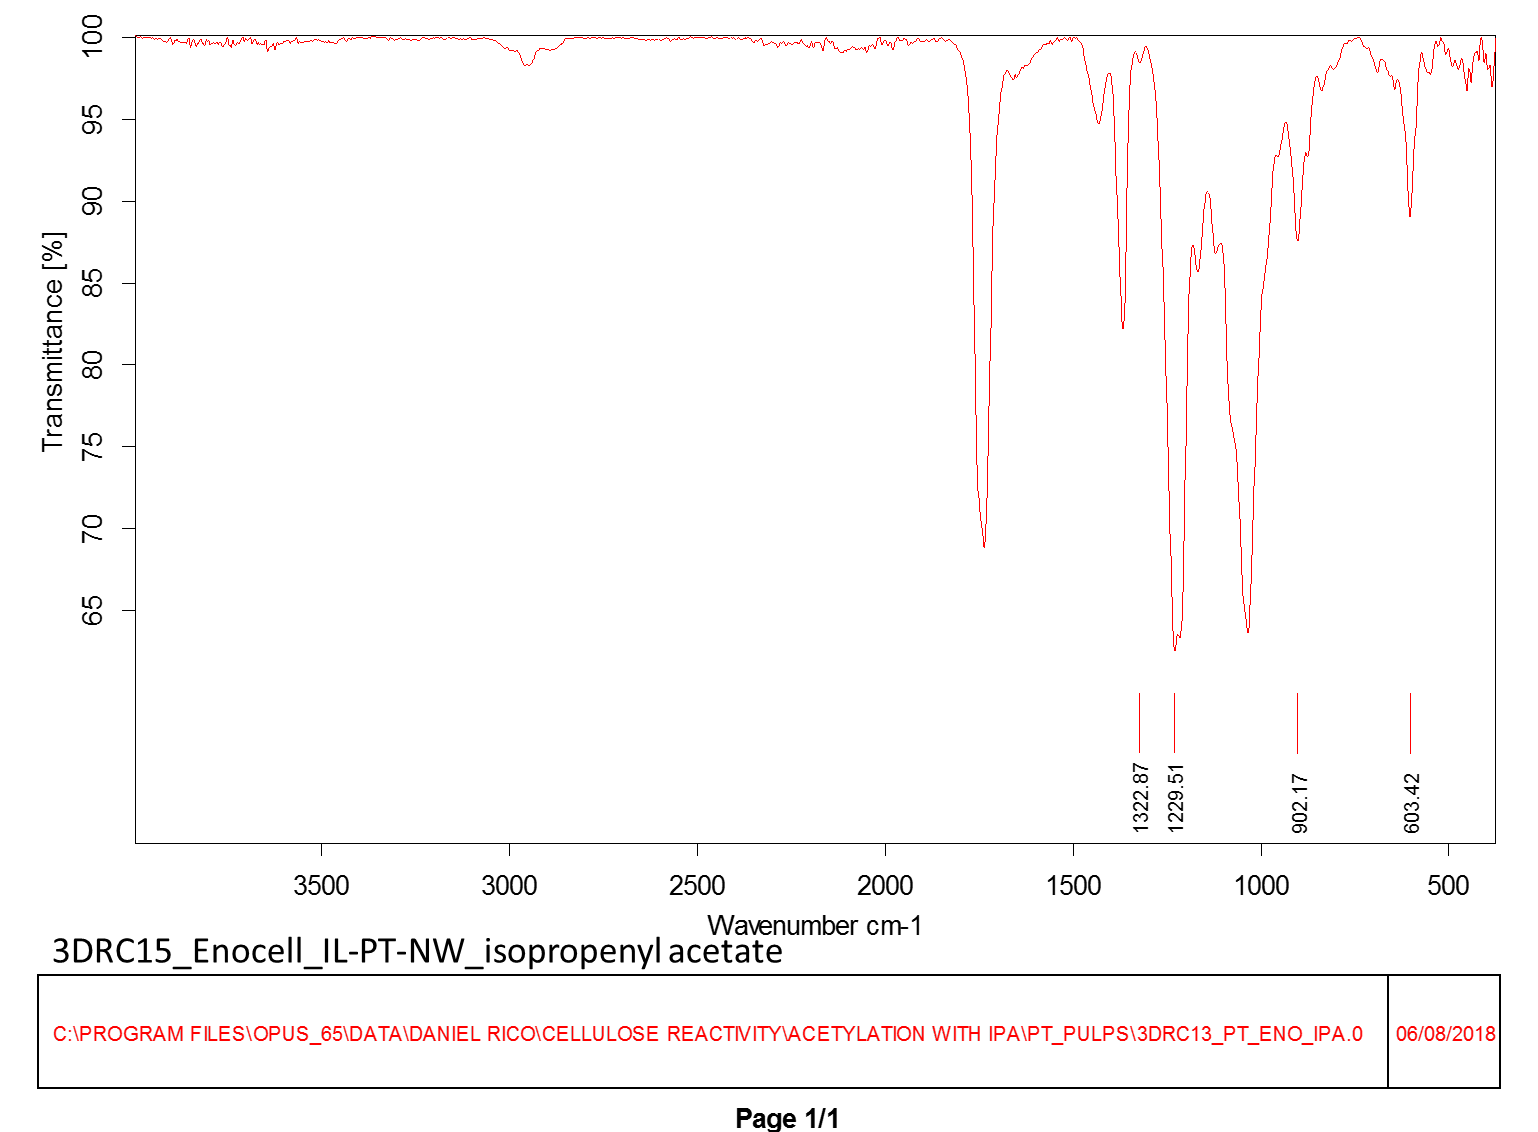


**Fig. S78**AFT-IR spectrum of Enocell IL-PT-NW acetylated with isopropenyl acetate.


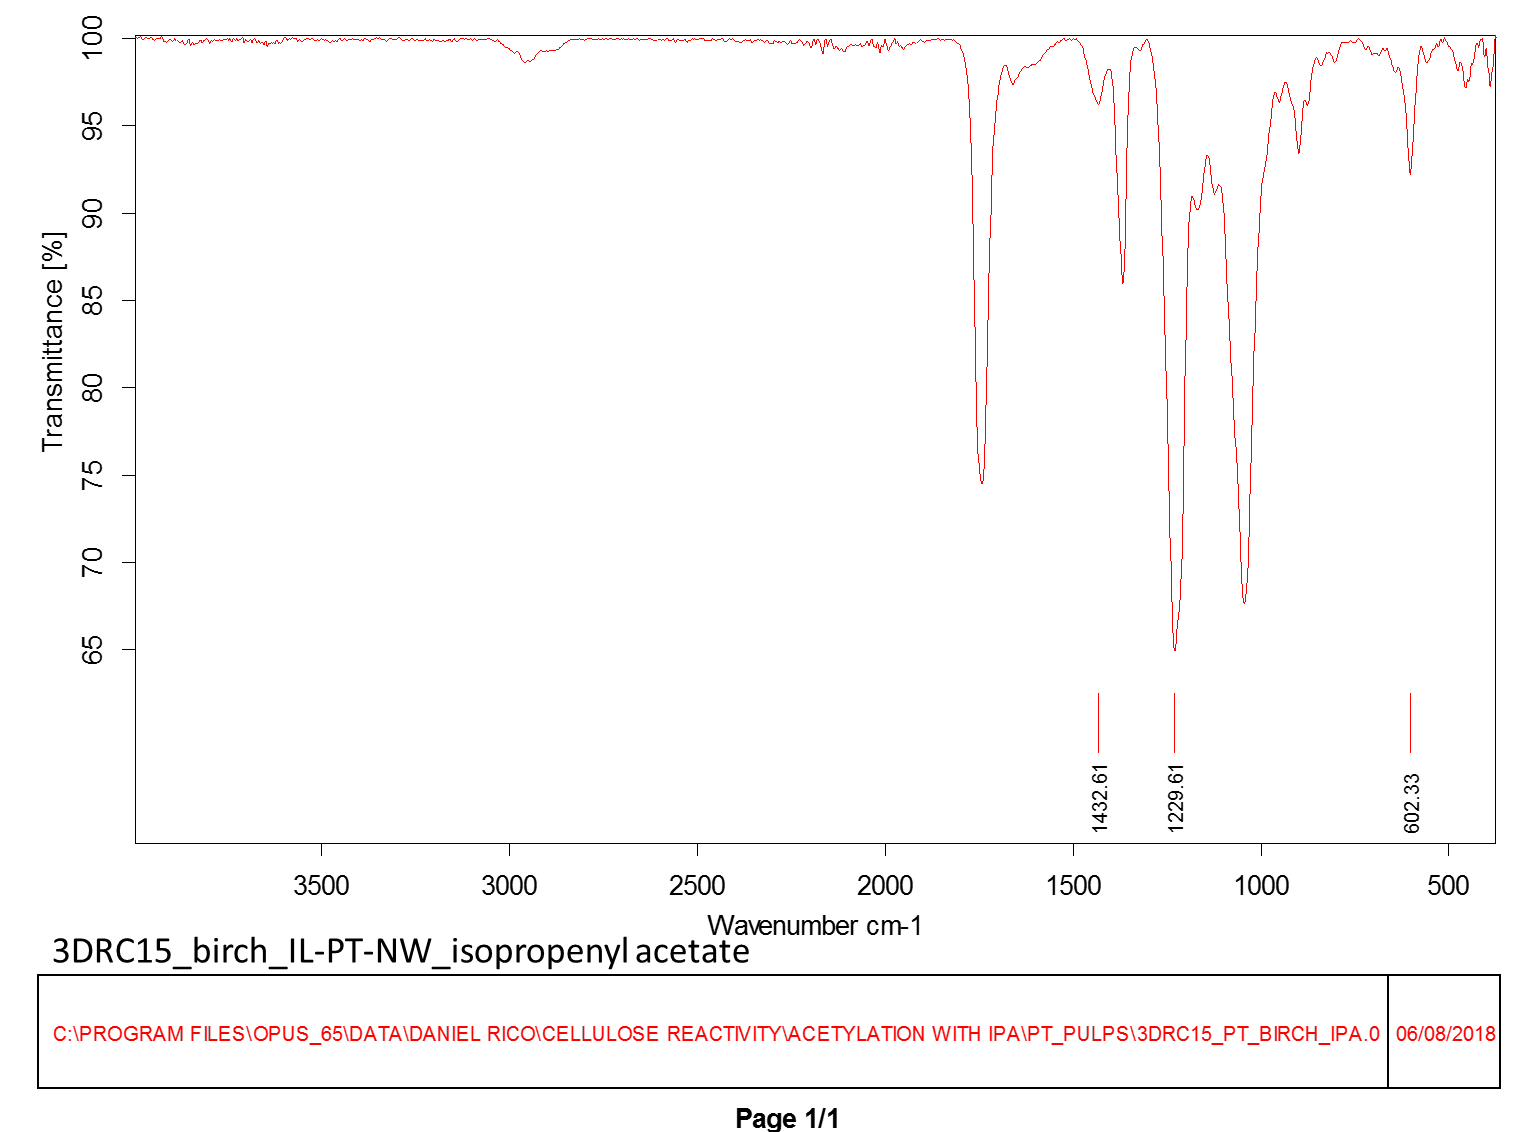


**Fig. S79** AFT-IR spectrum of birch IL-PT-NW acetylated with isopropenyl acetate.


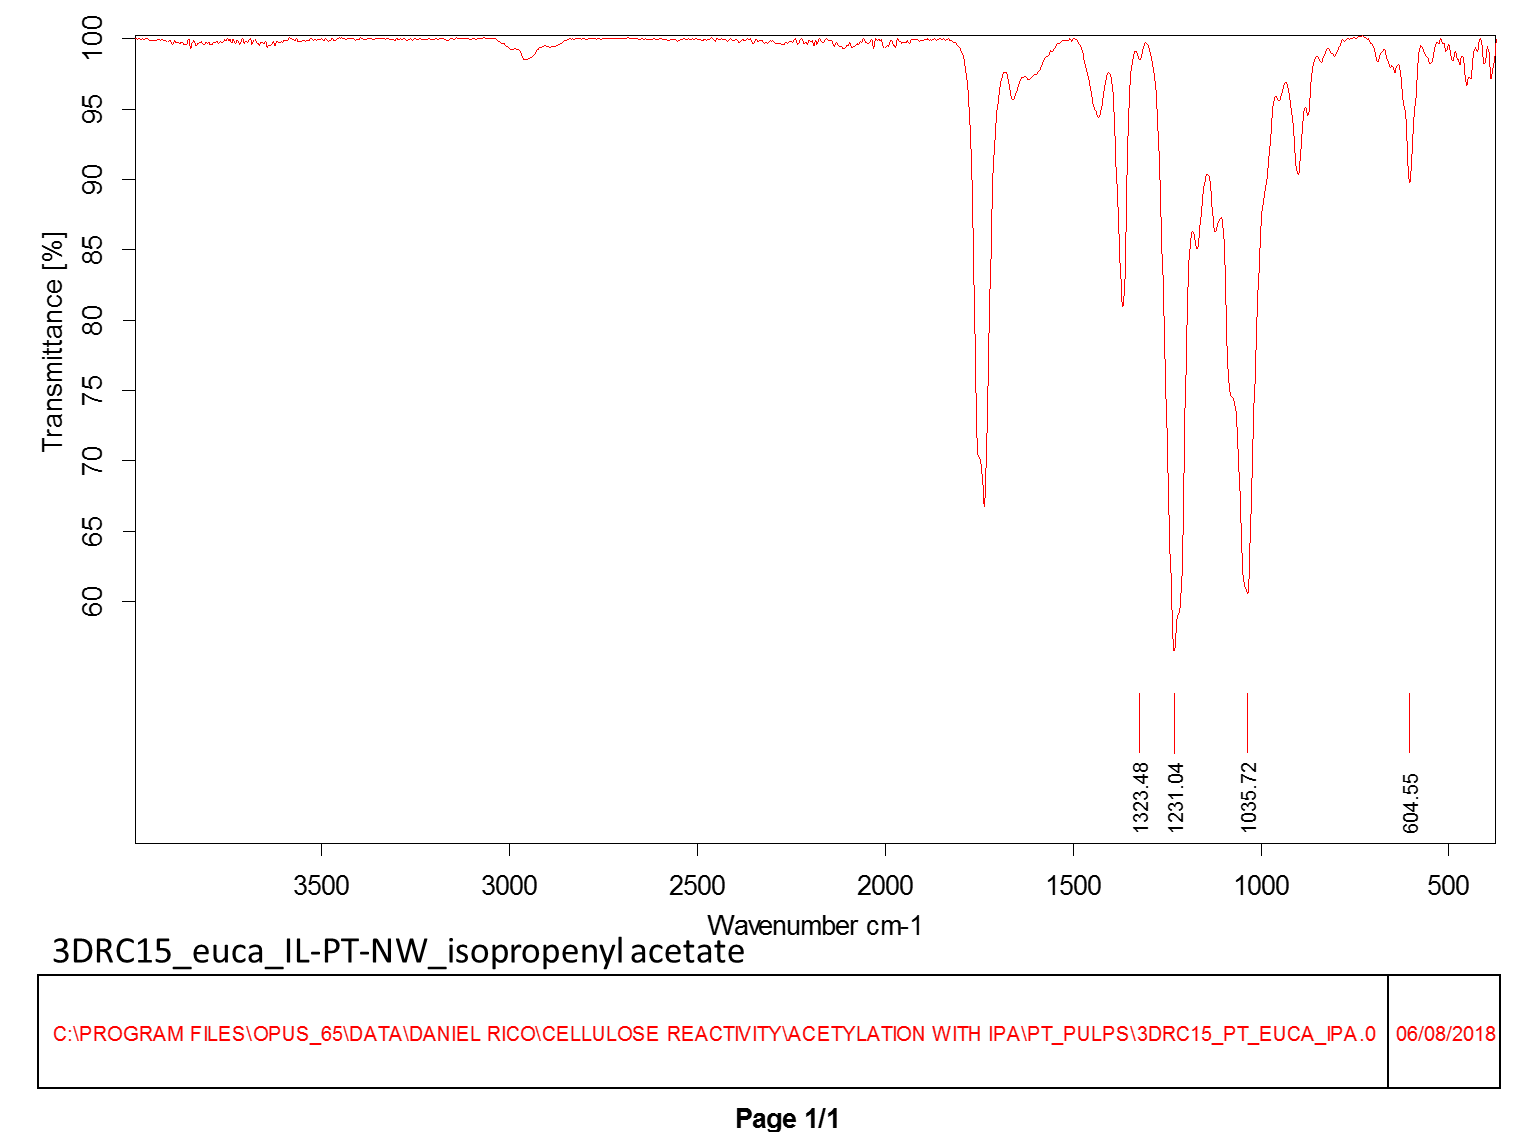


**Fig. S80**AFT-IR spectrum of eucalyptus IL-PT-NW acetylated with isopropenyl acetate.


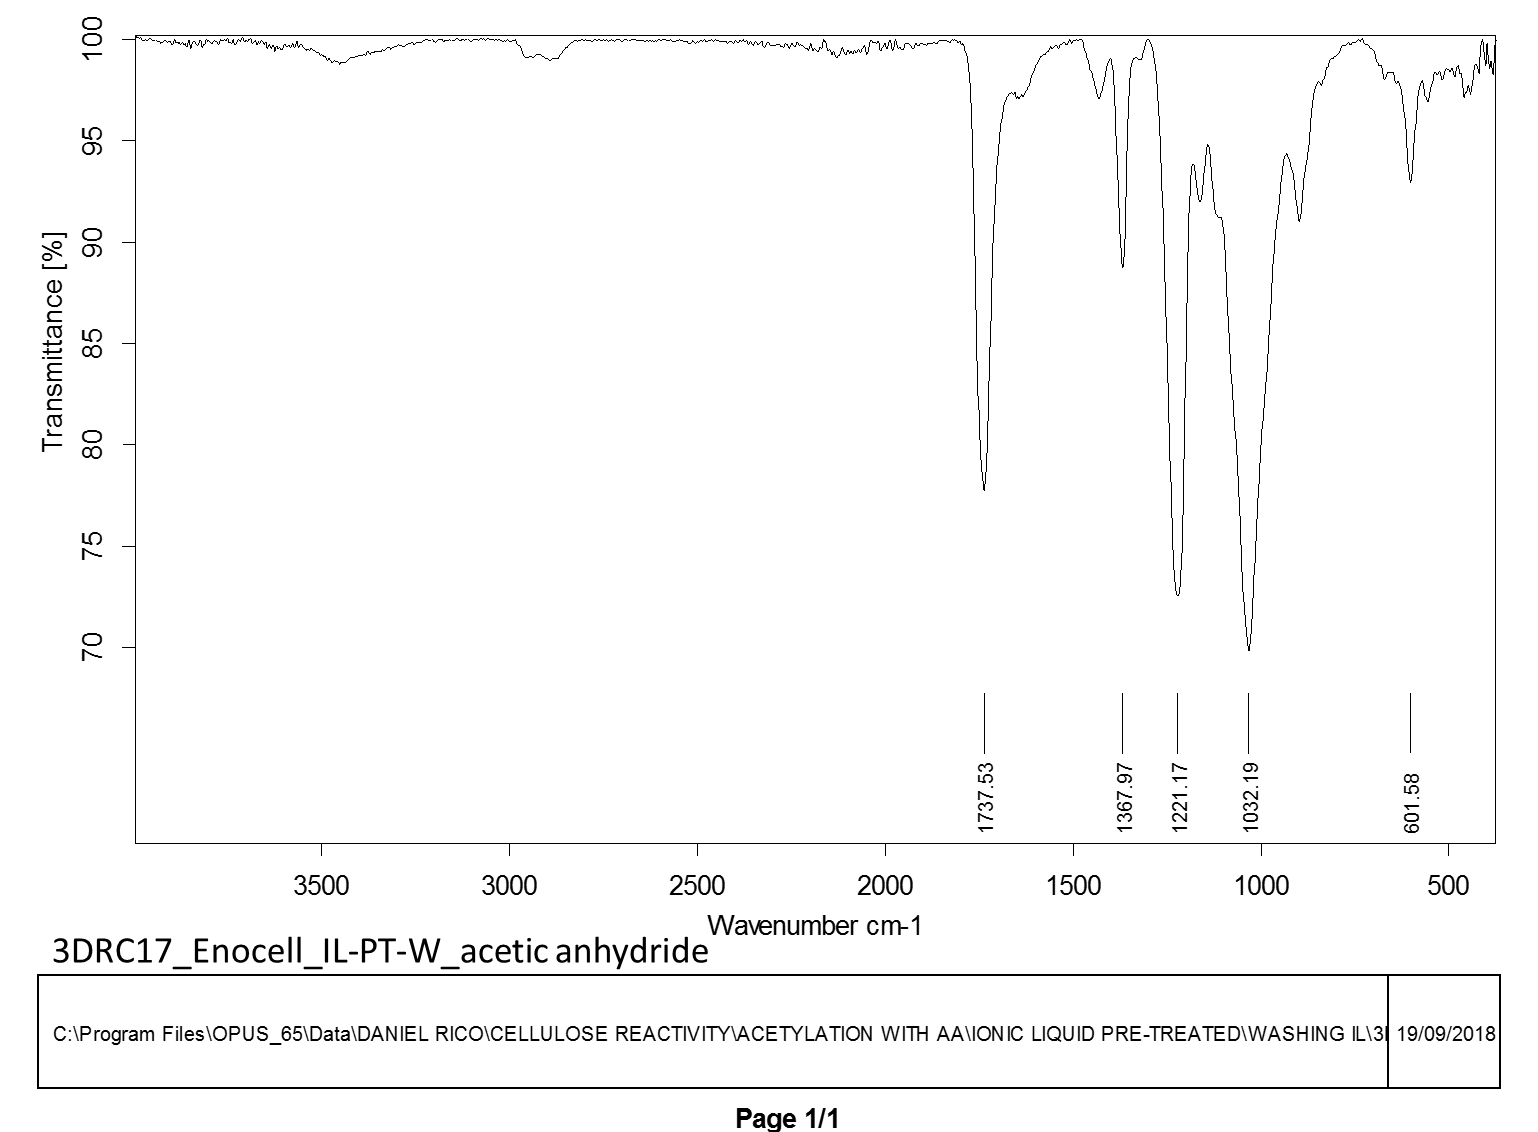


**Fig. S81** AFT-IR spectrum of Enocell IL-PT-W acetylated with acetic anhydride.


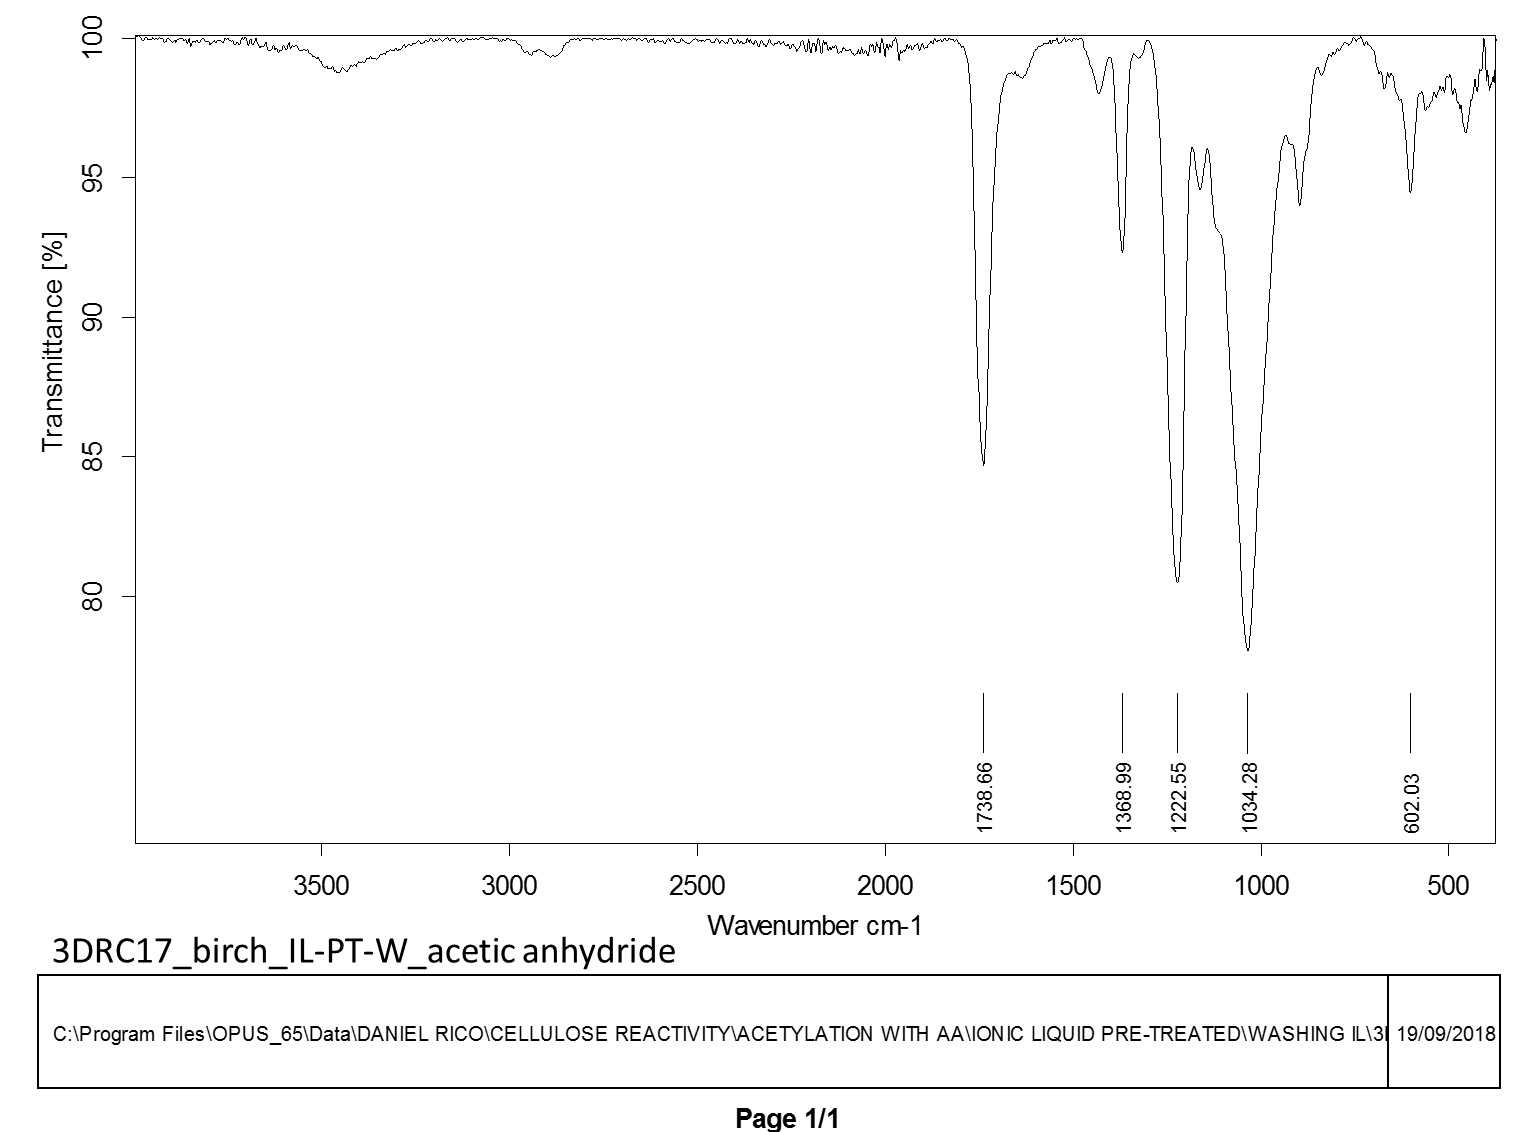


**Fig. S82** AFT-IR spectrum of birch IL-PT-W acetylated with acetic anhydride.


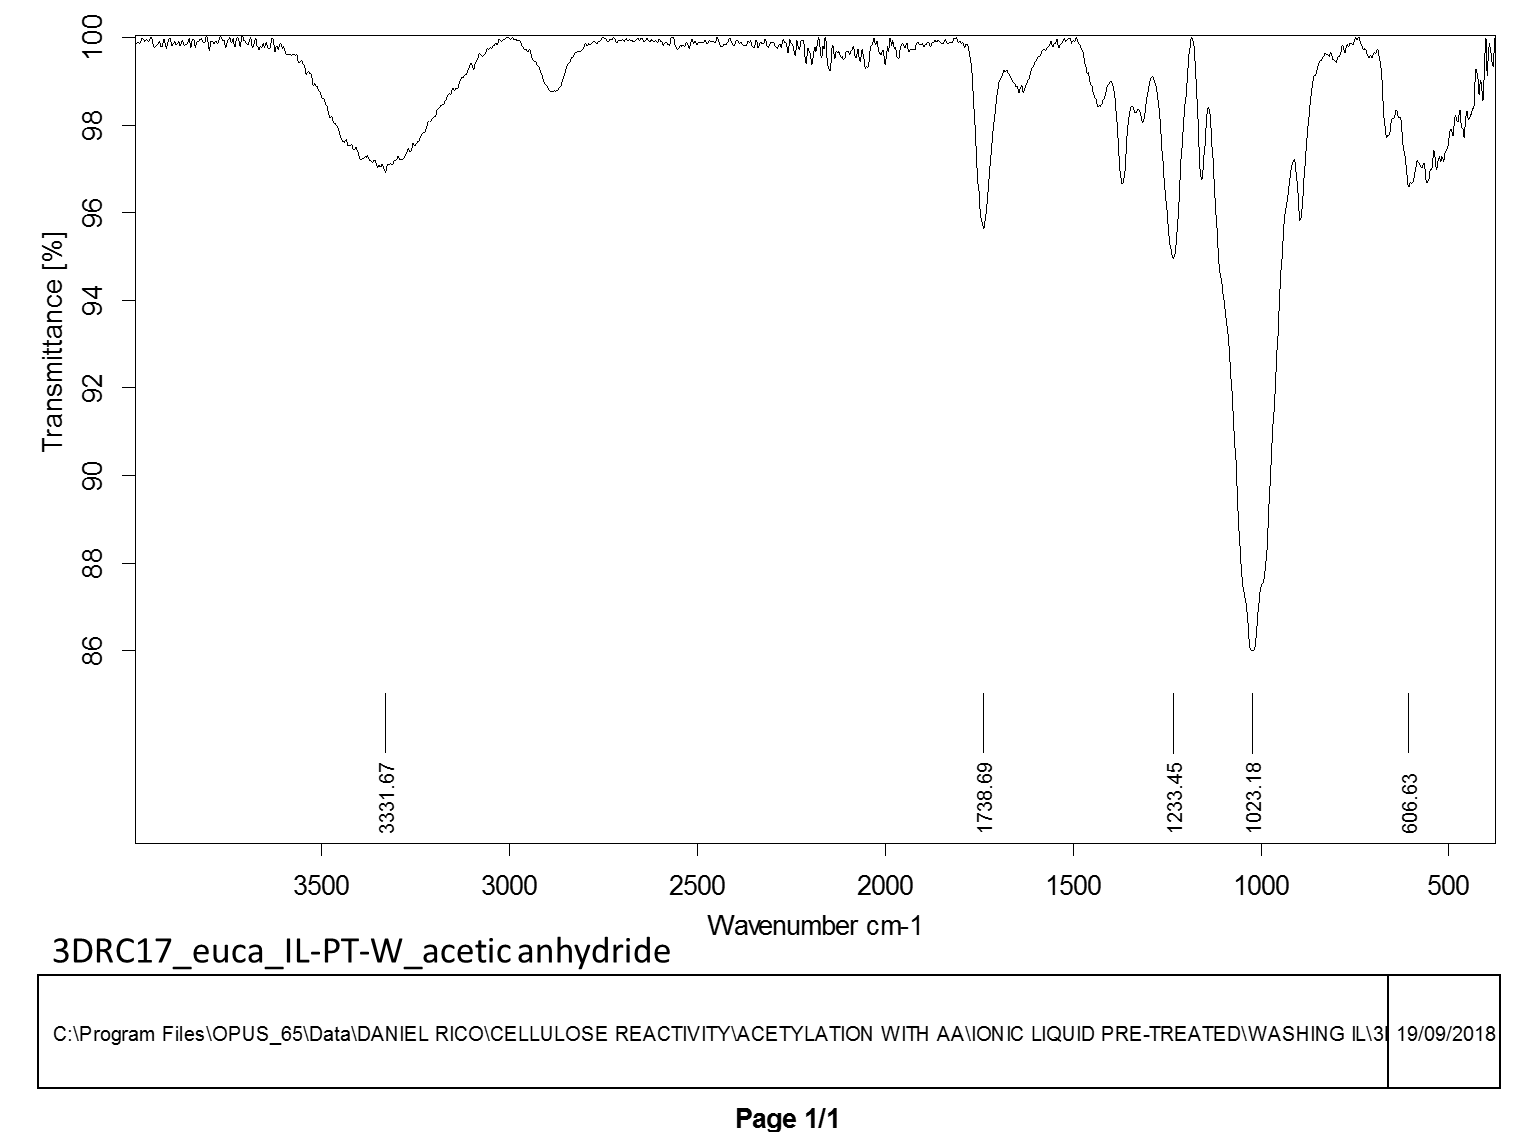


**Fig. S83**AFT-IR spectrum of eucalyptus IL-PT-W acetylated with acetic anhydride.


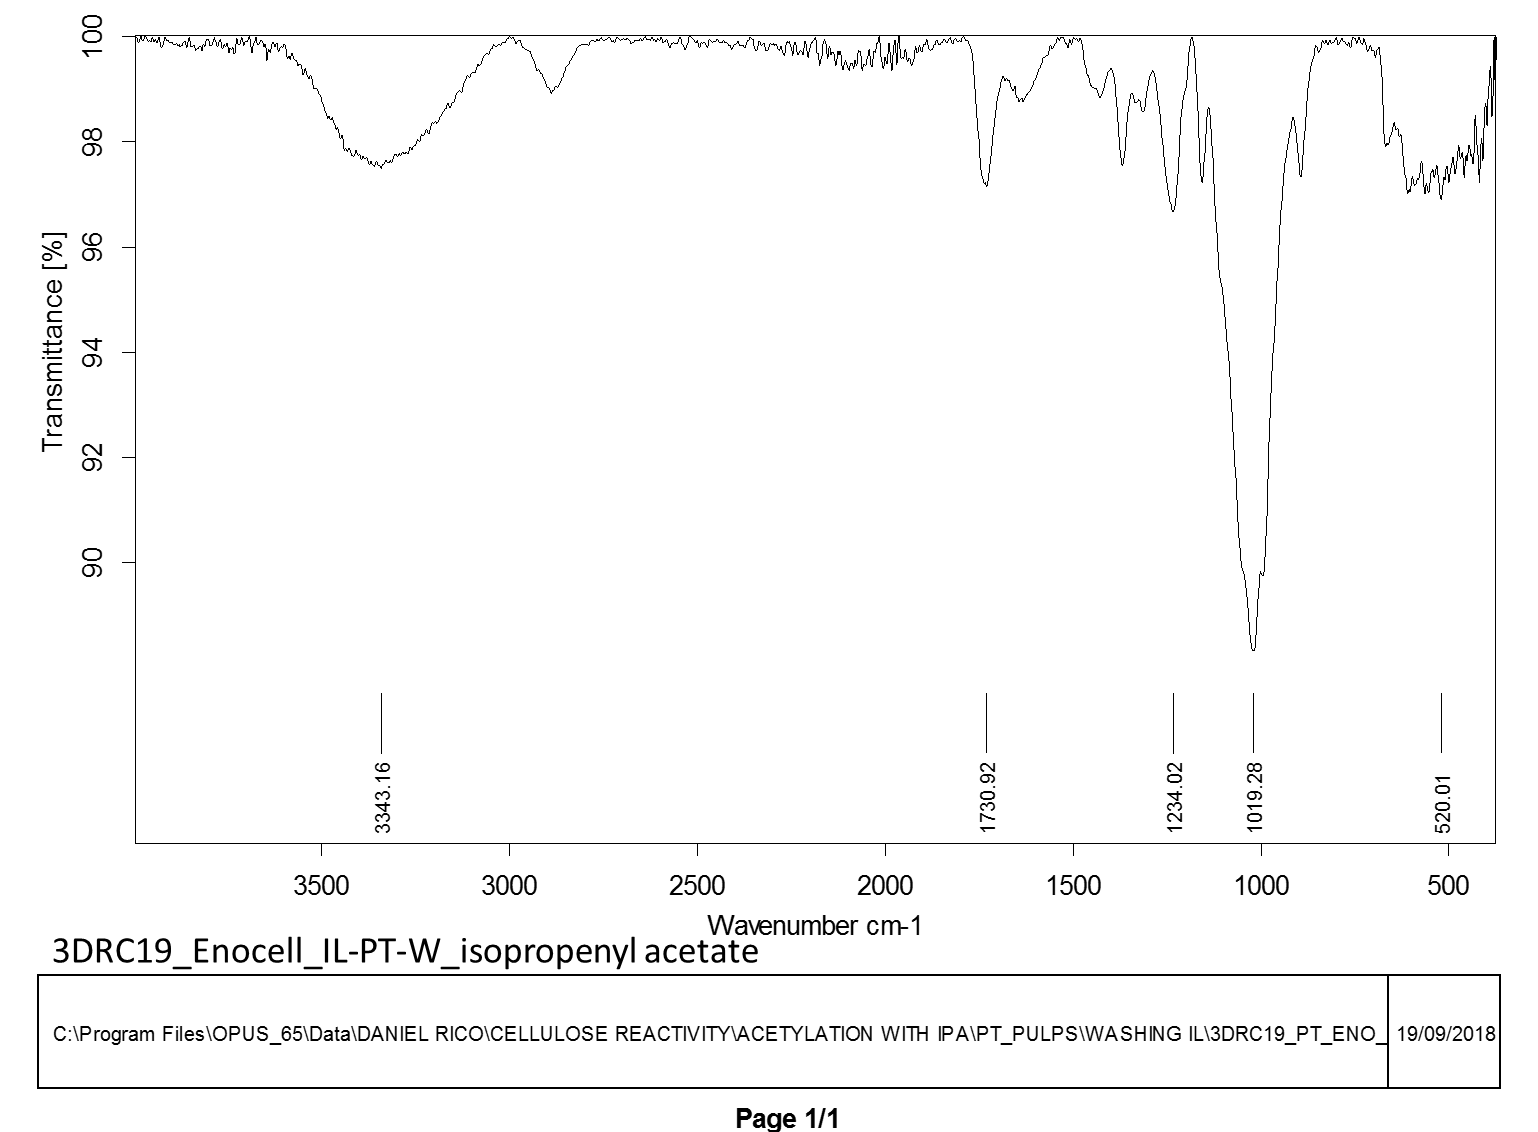


**Fig. S84**AFT-IR spectrum of Enocell IL-PT-W acetylated with isopropenyl acetate.


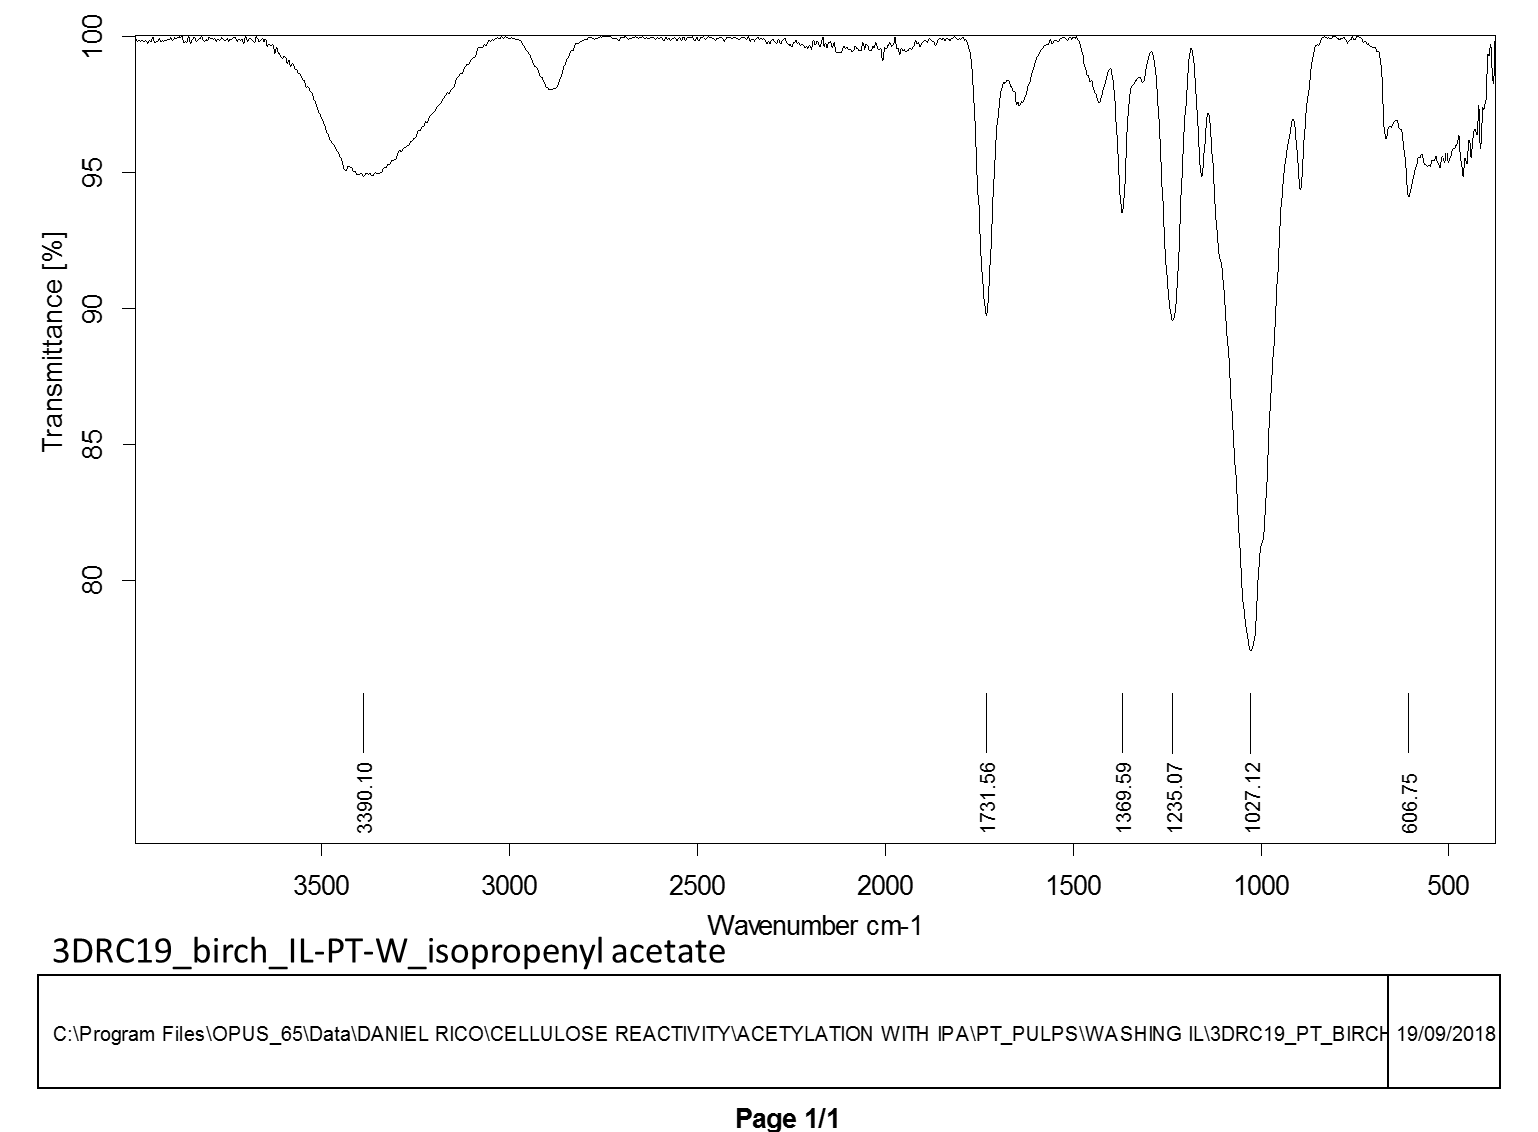


**Fig. S85** AFT-IR spectrum of birch IL-PT-W acetylated with isopropenyl acetate.

# **AcNH-TEMPO oxidation as second model reaction**

Cellulose (250 mg, 1.54 mmol) was dispersed into 0.1 M acetate buffer at pH 5.80 (25 ml) in a round-bottomed flask, equipped with magnetic stirrer bar. To this suspension, NaClO2 (80%, 212 mg, 1.87 mmol) and 4-acetamide-TEMPO (24 mg, 0.112 mmol) were added, followed by NaClO (commercial 10 wt% solution, 0.08 ml, 0.125 mmol diluted to 1 wt% with distilled water). The sealed reaction mixture was stirred at 40°C for 24 h. Extra NaClO2 (80%, 212 mg, 1.87 mmol) and NaClO (aq., 10%, 0.08 ml, 0.125 mmol, diluted to 1%) were then added and the reaction mixture was stirred at 40°C for an additional 48 h. The total dissolution of the cellulosic material did not occur during the course of the reactions. After the completion of the reaction, a solid precipitate was separated by centrifugation and washed subsequently with distilled water (3 × 30 ml) and ethanol (3 × 25 ml). The combined supernatant was diluted with additional ethanol (ca. 100 ml), and centrifuged to collect further precipitated solids. The obtained water soluble and insoluble fractions of the AcNH-TEMPO-oxidized celluloses, in the form of the sodium salts, were then freeze-dried.

## **Acidification of AcNH-TEMPO-oxidized samples for IR and GPC Analyses**

For the purposes of further analyses, the sodium salts of the precipitated AcNH-TEMPO-oxidized celluloses were acidified according to Fujisawa et al. (2010), as sodium carboxylates were found to be non-soluble LiCl/DMA (GPC solvent) and for more accurate IR analysis. ATR-IR results of experiments on the carboxylate content of the salts is not applicable as the carbonyl stretch for the sodium salts have increased intensity over the non-ionic (acidified) forms (Smith 2018).

Acidification Procedure: To 2 w/v % of oxidized cellulosic material suspended in water (100 mg in 5 ml of water), 0.2 M HCl (aq., 5 ml) was added. This resulted in a 1 w/v % suspension with pH ca. 1.0. The formed white precipitate was separated by centrifugation, washed with ethanol (3 × 10 ml) and freeze-dried. The oxidized product was analysed by ATR-IR and GPC. The carboxylate content was also measured by conductometric titration for the raw fractions, which were insoluble in water during the oxidation. These afforded sufficient amounts of materials for analysis.

## **IR Analysis of AcNH-TEMPO-oxidised samples**

The relative degrees of oxidation for each sample were determined by deconvolution of the ATR-IR data. Deconvolution was performed on the baseline corrected data. Peak areas were determined from the areas of combined Gaussian functions applied to the data in *‘Fityk’ for the* C=O bands (1500-1800 cm-1) and for the cellulose backbone C-O stretches (700-1200 cm-1). Gaussian functions were applied where the peak maxima lie within the above ranges (**Figure S86**). The C=O typically required a maximum of 3 Gaussians for accurate fitting. The C-O region typically required ~8 Gaussians for accurate fitting. The relative degrees of oxidation were then calculated from the ratio of the C=O vs C-O total peak areas, for the acidified fractions. As stated above, the acidified forms were preferred but in some cases, there was not enough of the sodium salts to prepare the acidified forms for analysis (Enocell-Untreated Pulp-Soluble fraction & Birch Untreated Pulp-Soluble Fraction). To determine relative degrees of oxidation for these samples, a correlation of the peak ratios was drawn, for those samples with ATR-IR analysis on both the acidified and sodium salt forms (**Figure S87**). The relative degree of oxidation, by IR, could then be determined from this correlation.


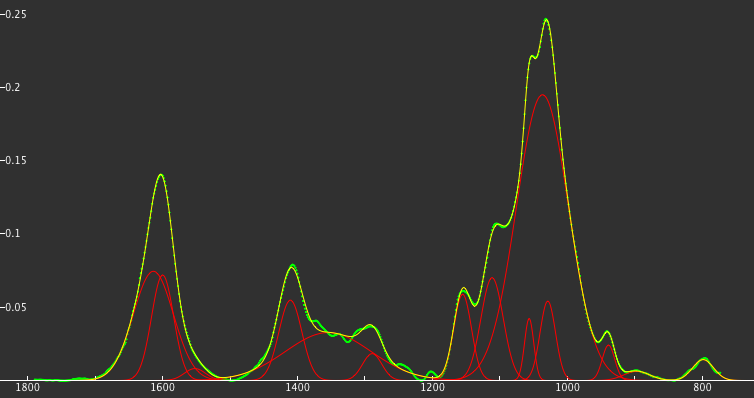


**Fig. S86** Gaussians applied for deconvolution of the baseline-corrected ATR-IR data of the AcNH-TEMPO samples.


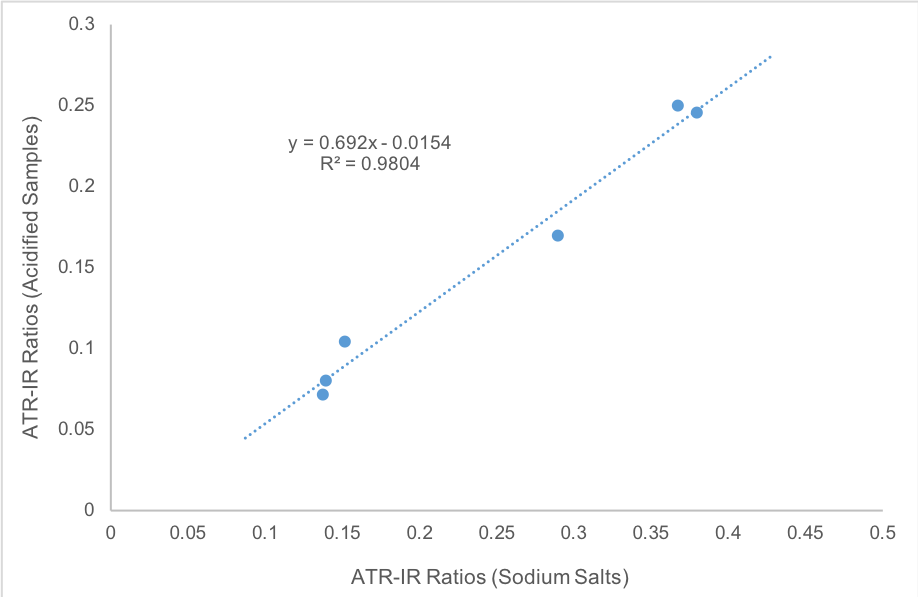


**Fig. S87** Correlation between IR ratios from acidified and sodium salt forms of AcNH-TEMPO-oxidised samples.

ATR-IR spectral data used for determination of the ATR-IR ratios of individual fractions are shown in **Figures S88-S93**.


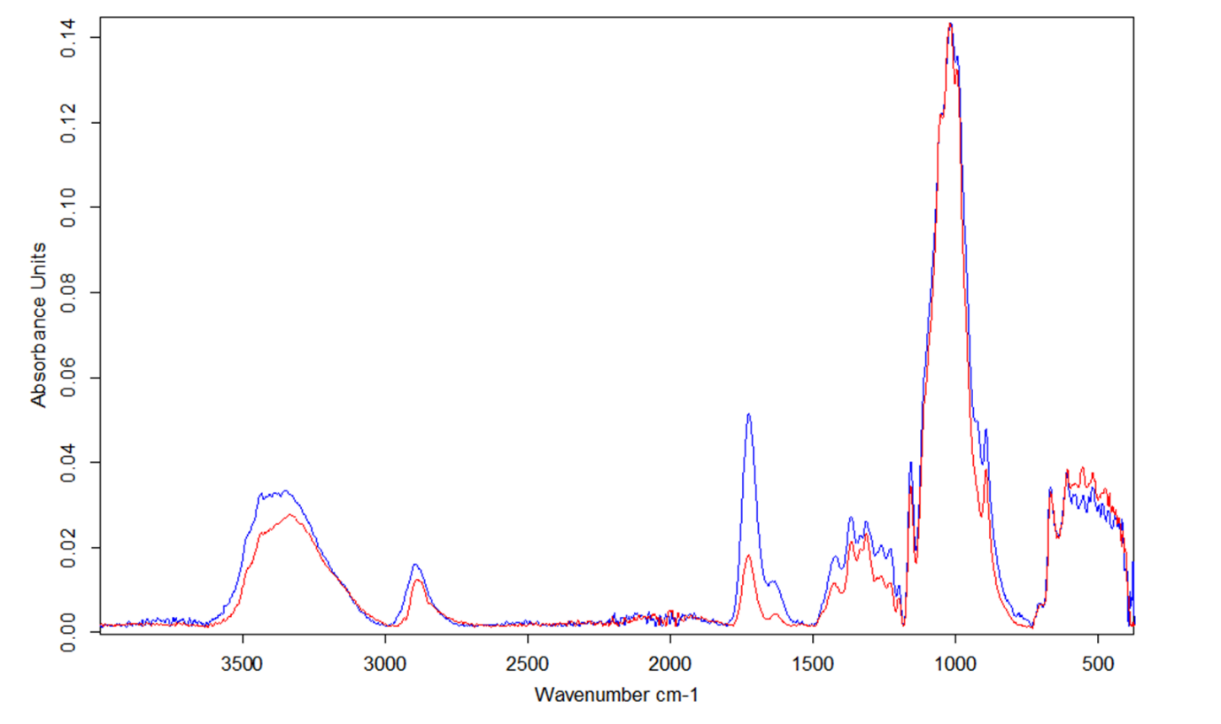


**Fig. S88** ATR-IR spectrum of acidified individual fractions of AcNH-TEMPO-oxidized Enocell IL-PT-W (insoluble with red line, soluble with blue line).


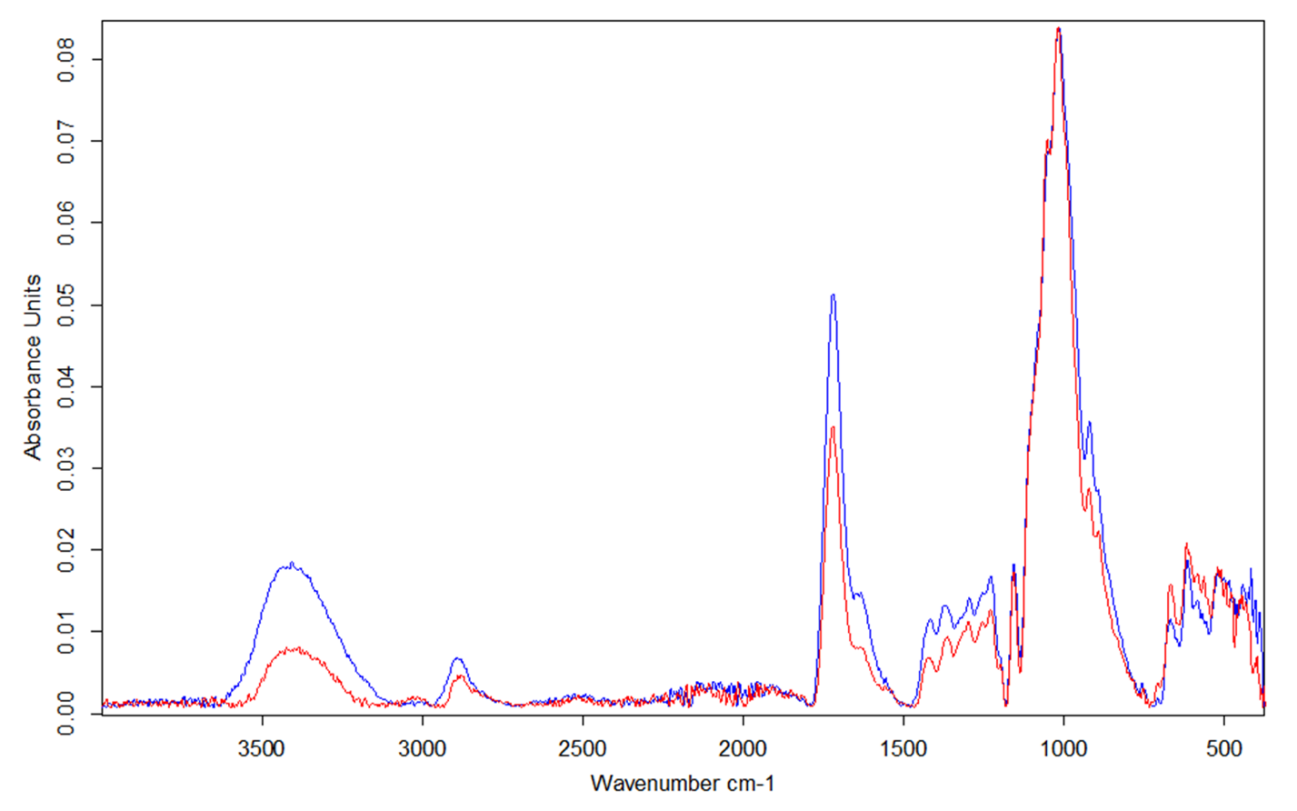


**Fig. S89** ATR-IR spectrum of acidified individual fractions of AcNH-TEMPO-oxidized Enocell IL-PT-NW (insoluble with red line, soluble with blue line).


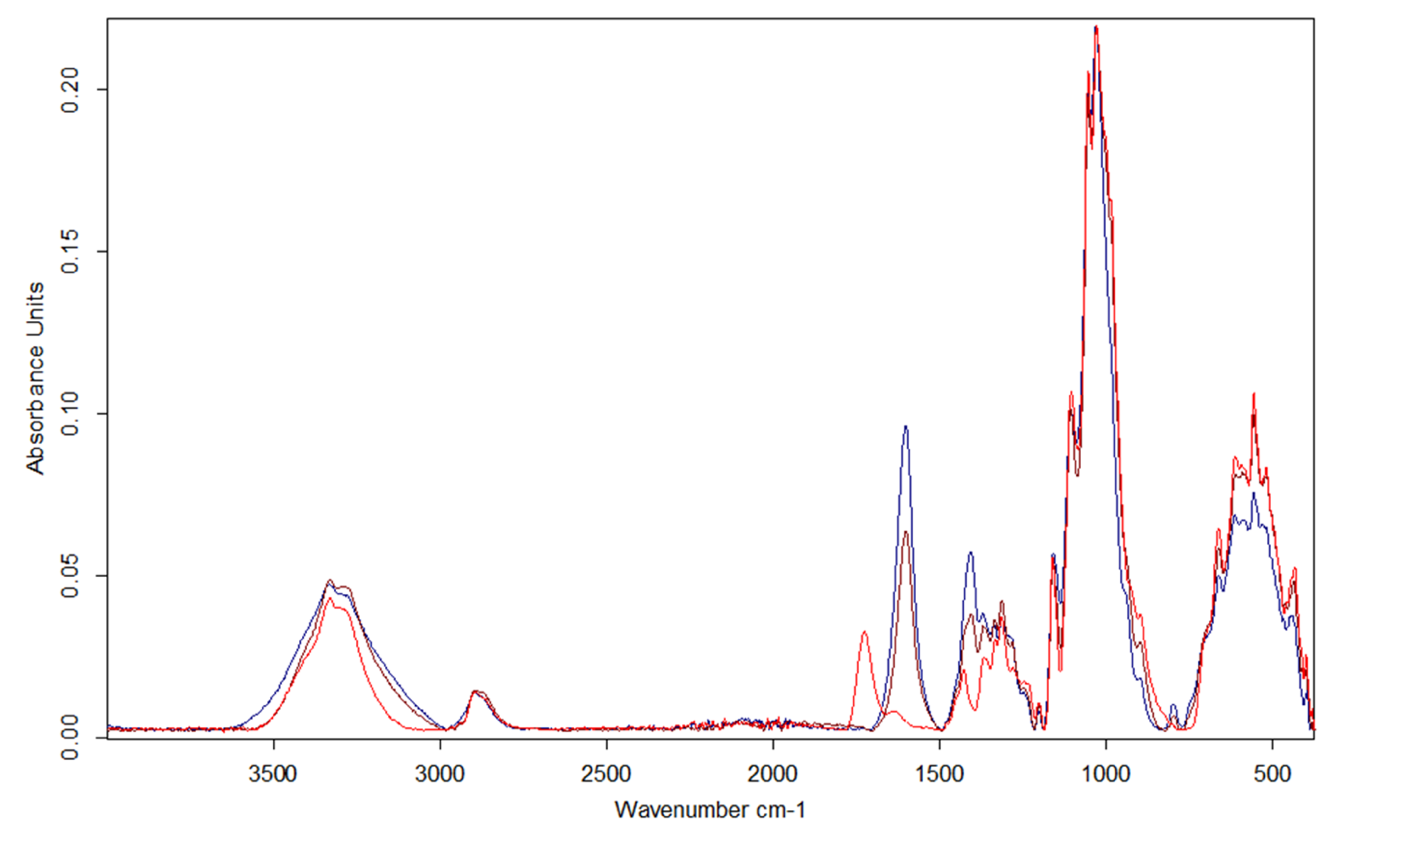


**Fig. S90** ATR-IR spectrum of non-acidified individual fractions of AcNH-TEMPO-oxidized Enocell untreated pulp (insoluble with dark red line, soluble with dark blue line) and respective acidified insoluble fraction (with red line).


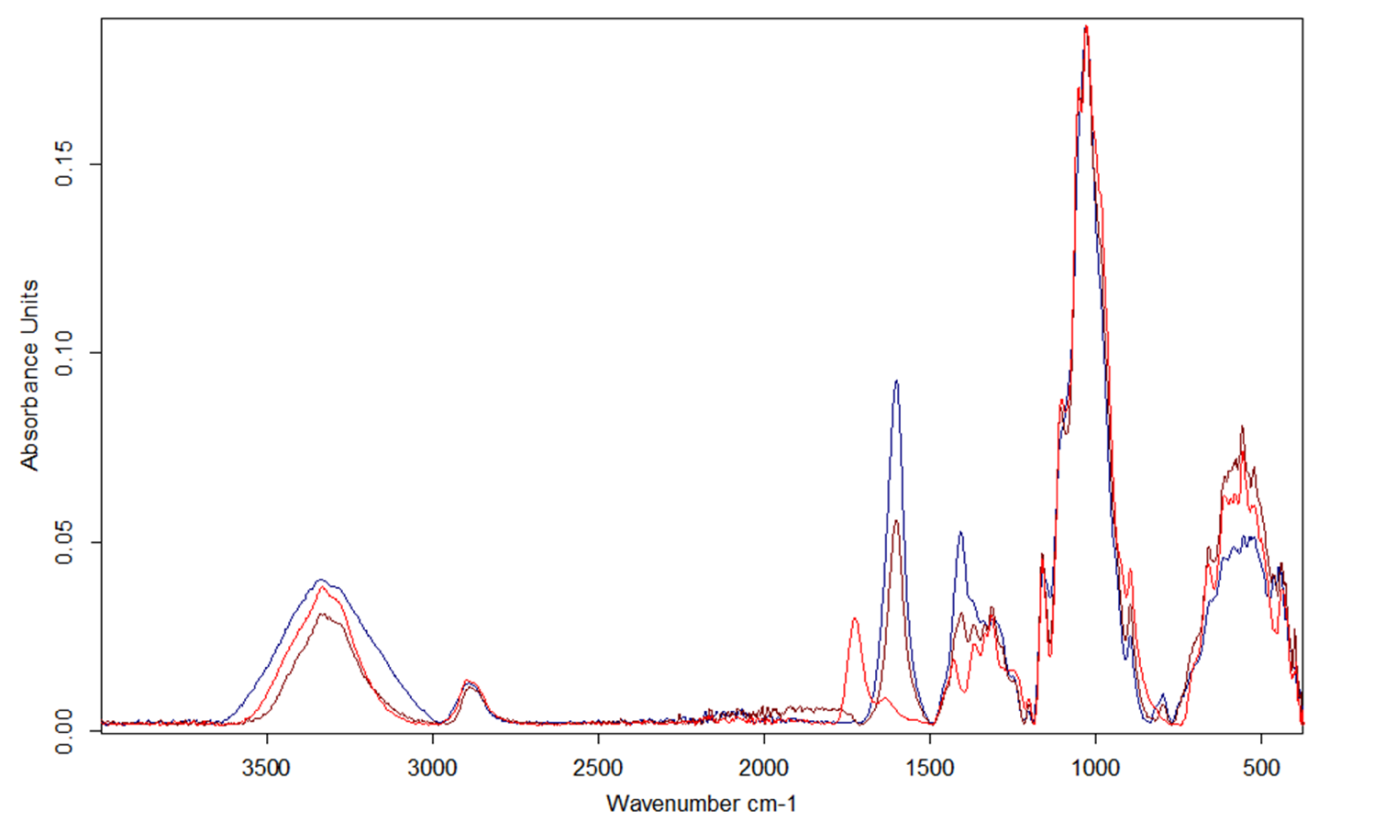


**Fig. S91** ATR-IR spectrum of non-acidified individual fractions of AcNH-TEMPO-oxidized birch untreated pulp (insoluble with dark red line, soluble with dark blue line) and respective acidified insoluble fraction (with red line).


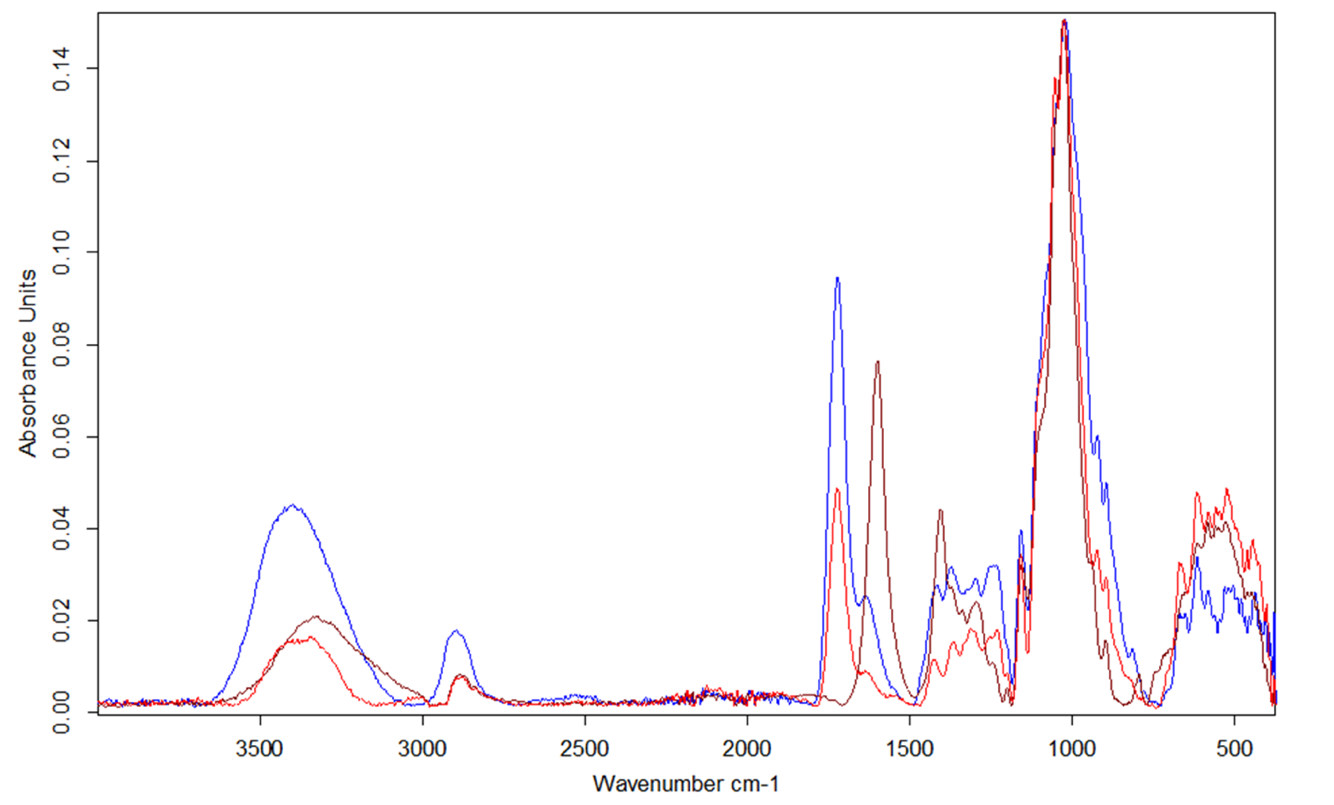


**Fig. S92** ATR-IR spectrum of non-acidified individual fraction of AcNH-TEMPO-oxidized birch IL-PT-W (insoluble with dark red line) and respective acidified fractions (insoluble with red line, soluble with blue line).


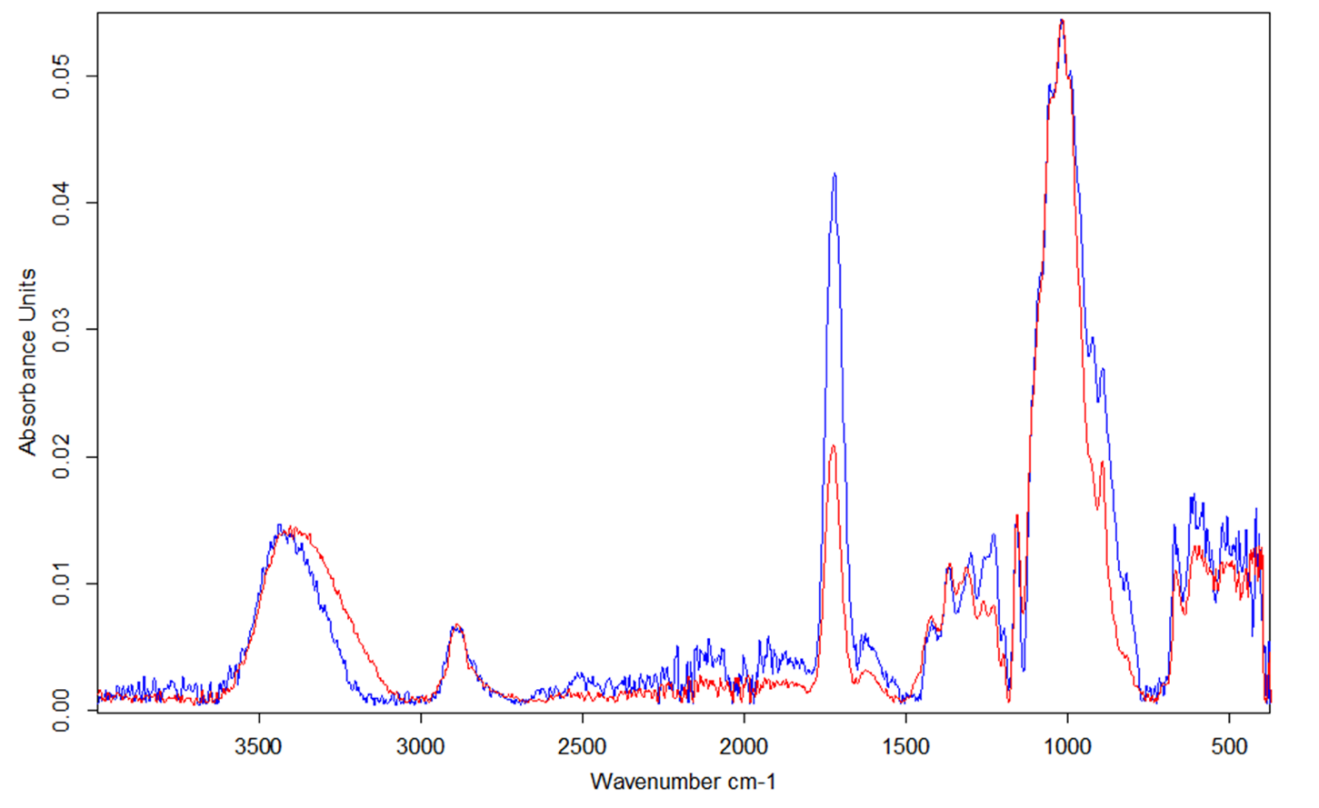


**Fig. S93** ATR-IR spectrum of acidified individual fractions of AcNH-TEMPO-oxidized birch IL-PT-NW (insoluble with red line, soluble with blue line).

## **Conductometric titration for determination of carboxylate content of AcNH-TEMPO-oxidized cellulosic material**

For separate insoluble samples, with lower degrees of oxidation, conductometric titrations have been performed, giving a correction factor to the ATR-IR data and extend the estimate of degree of oxidation to the full series of reaction products. AcNH-TEMPO-oxidized material in freeze-dried sodium form from the insoluble fractions was suspended in distilled water (100 mg in 20 mL) and diluted with 0.01 M NaCl, to raise conductivity of the slurry to significant levels. Then, 0.1 M HCl was added to the suspension to set the values to 2.4–2.7 pH (2-3 mL). The mixtures were titrated with 0.04 M NaOH at the rate of 0.2-0.3 mL/min, with efficient stirring, to pH 11. Conductivities were measured during this process. These titrations afforded conductivity curves (**Figure S94**), which indicated presence of strongly and weakly acidic groups, from added HCl and that of the carboxylic acids respectively.

**Fig. S94** Conductivity titration curve for the insoluble fractions of AcNH-TEMPO oxidized (**a**) non-treated Enocell; (**b**) non-treated Birch.

To further improve error, cotton linters were oxidized using the above-mentioned conditions and the insoluble fraction was titrated. Further, carboxylic content (CC) in mmol/g of the fractions was calculated by **[Eq.(5)]**:

(**5**)

Where *C* is the concentration of the NaOH in mol/L, *V1 and V2* stand for the volumes of the NaOH in mL, *w* is the weight of the sample in g. ATR-IR ratios from the deconvolution method shows a good linear correlation (R2 0.993) with the carboxylate content for these samples (**Figures S95**). This function was used as basis for CC determination for other deconvoluted individual fractions. The CC values were then also converted into the degree of oxidation percentage (%DO) by calculation of the percentage of total C6 converted to carboxylate. A theoretical 100% value of 4.67 mmol/g was used (1000/(162+30+22)). Results are summarized in the main text **Table 3**.


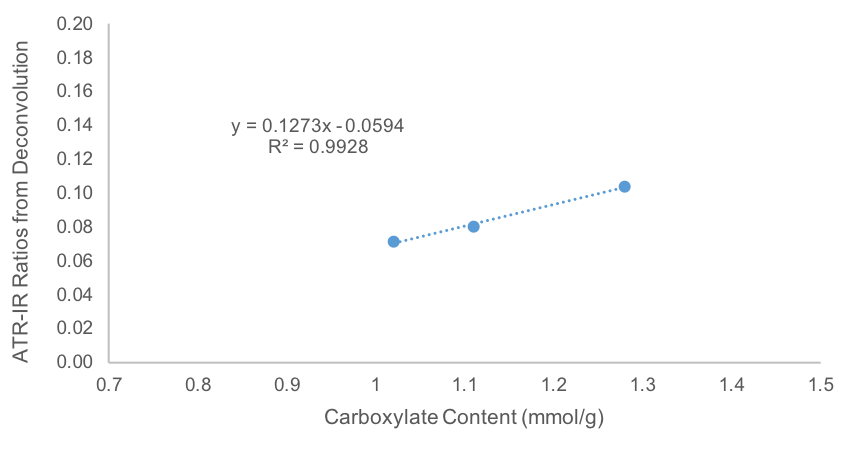


**Fig. S95** Linear correlation of ATR-IR ratio from deconvolution and carboxylate content of the titrated samples.

# **Gel permeation chromatography (GPC)**

## **Sample preparation for GPC**

Cellulosic material (17.5 mg) was weighted into glass vial, DMAc (1.25 ml) was added and suspension was stirred at 130°C for 2 h. Then sample was allowed to cool to 90 °C and anhydrous of LiCl (87.5 mg) was added. Sample was further stirred overnight at ambient temperature. Next day, sample was diluted with DMAc (16.25 ml) so that final concentration of LiCl in the solution is 0.5 w/v % and allowed to stir for 1 h more. All the samples were additionally filtered through Pall Acrodisc GHP 0.45µm filters, prior to injection.

## **GPC tables**

**Table S5.** Weight-average degree of polymerisation (DPw) and polydispersity values (D) of starting materials and acetylated products.

| Starting material | DPw[a] (SM)[b] | D[c] | DPw[a] (AA) [d] | D[c] | DPw[a] (IPA) [e] | D[c] |
| --- | --- | --- | --- | --- | --- | --- |
| Enocell untreated pulp | 1333 | 4.04 | 1330 | 4.32 | 1290 | 6.97 |
| Enocell IL-PT-W[f] | 811 | 2.97 | 1140 | 3.21 | 945 | 3.34 |
| Enocell IL-PT-NW[g] | - | - | - | - | 695 | 8.84 |
| Birch untreated pulp | 1765 [h] | 5.35 | 1850 [h] | 7.64 | 1780 [h] | 5.64 |
| Birch IL-PT-W[f] | 1430 | 4.47 | 920 [h] | 3.46 | 765 [h] | 8.21 |
| Birch IL-PT-NW[g] | - | - | 415 | 17.58 | 680 | 13.95 |
| Eucalyptus untreated pulp | 1956 | 5.34 | 1475 [h] | 22.83 | 1825 | 14.78 |
| Eucalyptus IL-PT-W[f] | 1236] | 3.30 | 1175 [h] | 3.44 | - | - |
| Eucalyptus IL-PT-NW[g] | - | - | 725 [h] | 29.43 | 420 [h] | 19.46 |

[a] DPw; Degree of polymerization in weight-average. [b] SM; Starting material. [c] D; Molecular Weight Distribution. [d] AA; Acetylated product with acetic anhydride as acetylating reagent. [e] IPA; Acetylated product with Isopropenyl acetate as acetylating reagent. [f] Enocell/Birch/Eucalyptus IL-PT-W; IL pre-treated pulp with a washing step to remove the IL prior to reaction (heterogeneous route). [g] Enocell/Birch/Eucalyptus IL-PT-NW; IL pre-treated pulp without washing step (IL retained in pulp during acetylation). [h] Sample did not fully dissolve during GPC sample preparation.

**Table S6.** Number-average degree of polymerisation (DPN) and polydispersity values (D) of starting materials and acetylated products.

| Starting material | DPN[a] (SM) [b] | D[c] | DPN[a] (AA) [d] | D[c] | DPN[a] (IPA) [e] | D[c] |
| --- | --- | --- | --- | --- | --- | --- |
| Enocell untreated pulp | 330 | 4.04 | 310 | 4.32 | 185 | 6.97 |
| Enocell IL-PT-W [f] | 273 | 2.97 | 355 | 3.21 | 285 | 3.34 |
| Enocell IL-PT-NW[g] | - | - | - | - | 80 | 8.84 |
| Birch untreated pulp | 330 [h] | 5.35 | 245 [h] | 7.64 | 315 [h] | 5.64 |
| Birch IL-PT-W [f] | 320 | 4.47 | 265 [h] | 3.46 | 95 [h] | 8.21 |
| Birch IL-PT-NW [g] | - | - | 25 | 17.58 | 50 | 13.95 |
| Eucalyptus untreated pulp | 366 | 5.34 | 65 [h] | 22.83 | 125 | 14.78 |
| Eucalyptus IL-PT-W [f] | 374 | 3.30 | 340 [h] | 3.44 | - | - |
| Eucalyptus IL-PT-NW [g] | - | - | 25 [h] | 29.43 | 20 [h] | 19.46 |

[a] DPN; Degree of polymerization in number-average. [b] SM; Starting material. [c] D; Molecular Weight Distribution. [d] AA; Acetylated product with acetic anhydride as acetylating reagent. [e] IPA; Acetylated product with Isopropenyl acetate as acetylating reagent. [f] Enocell/Birch/Eucalyptus IL-PT-W; IL pre-treated pulp with washing step to remove the IL prior reactivity (heterogeneous route). [g] Enocell/Birch/Eucalyptus IL-PT-NW; IL pre-treated pulp without washing step. Thus, still containing the IL (homogeneous route). [h] Sample was not fully soluble in the GPC sample preparation.

**Table S7.** Weight-average degree of polymerisation (DPw) and polydispersity values (D) of of starting materials and TEMPO oxidized products.

| Starting material | DPw[a] (SM) [b] | D[c] | DPw[a] (WInS) [d] | D[c] | DPw[a] (WS) [e] | D[c] |
| --- | --- | --- | --- | --- | --- | --- |
| Enocell untreated pulp | 1333 | 4.04 | 420 [h] | 9.30 | - | - |
| Enocell IL-PT-W [f] | 811 | 2.97 | 245 | 2.27 | 315 | 2.84 |
| Enocell IL-PT-NW [g] | - | - | 375 [h] | 8.22 | 635 [h] | 16.66 |
| Birch untreated pulp | 1765 [h] | 5.35 | 415 [h] | 9.36 | - | - |
| Birch IL-PT-W [f] | 1430 | 4.47 | 430 [h] | 9.35 | 420 [h] | 10.93 |
| Birch IL-PT-NW [g] | - | - | 260 [h] | 5.91 | 285 [h] | 6.22 |

[a] DPw; Degree of polymerization in weight-average. [b] SM; Starting material. [c] D; Molecular Weight Distribution. [d] WInS; Water Insoluble fraction. [e] WS; Water soluble fraction. [f] Enocell/Birch IL-PT-W; IL pre-treated pulp with washing step to remove the IL prior reactivity (heterogeneous route). [g] Enocell/Birch IL-PT-NW; IL pre-treated pulp without washing step. Thus, still containing the IL (homogeneous route). [h] Sample was not fully soluble in the GPC sample preparation.

**Table S8.** Number-average degree of polymerisation (DPN) and polydispersity values (D) of starting material and TEMPO oxidized products.

| Starting material | DPN[a] (SM) [b] | | | D[c] | DPN[a] (WInS) [d] | D[c] | DPN[a] (WS) [e] | D[c] |
| --- | --- | --- | --- | --- | --- | --- | --- | --- |
| Enocell untreated pulp | | 330 | 4.04 | | 45 [h] | 9.30 | - | - |
| Enocell IL-PT-W [f] | | 273 | 2.97 | | 105 | 2.27 | 110 | 2.84 |
| Enocell IL-PT-NW [g] | | - | - | | 45 [h] | 8.22 | 40 [h] | 16.66 |
| Birch untreated pulp | | 330 [h] | 5.35 | | 45 [h] | 9.36 | - | - |
| Birch IL-PT-W [f] | | 320 | 4.47 | | 45 [h] | 9.35 | 40 [h] | 10.93 |
| Birch IL-PT-NW [g] | | - | - | | 45 [h] | 5.91 | 45 [h] | 6.22 |

[a] DPN; Degree of polymerization in number-average. [b] SM; Starting material. [c] D; Molecular Weight Distribution. [d] WInS; Water Insoluble fraction. [e] WS; Water soluble fraction. [f] Enocell/Birch IL-PT-W; IL pre-treated pulp with washing step to remove the IL prior reactivity (heterogeneous route). [g] Enocell/Birch IL-PT-NW; IL pre-treated pulp without washing step. Thus, still containing the IL (homogeneous route). [h] Sample was not fully soluble in the GPC sample preparation.

# **References**

French AD (2014) Idealized powder diffraction patterns for cellulose polymorphs. Cellulose 21: 885-896. doi:10.1007/s10570-013-0030-4

Fujisawa S. Isogai T, Isogai A (2010) Temperature and pH stability of celluronic acid. Cellulose 17: 607–615. doi:10.1007/s10570-010-9407-9

Kakko T, King AWT, Kilpeläinen I (2017) Homogeneous esterification of cellulose pulp in [DBNH][OAc]. Cellulose 24: 5341-5354. <https://doi.org/10.1007/s10570-017-1521-5M>.

King AWT, Mäkelä V, Kedzior SA, Laaksonen T, Partl GJ, Heikkinen S, Koskela H, Heikkinen HA, Holding AJ, Cranston ED, Kilpeläinen I (2018) Liquid-state NMR analysis of nanocelluloses. Biomacromolecules 19: 2708-2720. doi: 10.1021/acs.biomac.8b00295

Kobayashi K, Kimura S, Togawa E, Wada M (2011) Crystal transition from cellulose II hydrate to cellulose II. Carbohydrate Polymers 86: 975-981. doi:10.1016/j.carbpol.2011.05.050

Smith BC (2018) The carbonyl group, part V: carboxylates-coming clean. Spectroscopy 33: 20-23.

Willker W, Leibfritz D, Kerssebaum R, Bermel W (1993) Gradient selection in inverse heteronuclear correlation spectroscopy. Magn. Reson. Chem. 31: 287–292. [doi.org/10.1002/mrc.1260310315](https://doi.org/10.1002/mrc.1260310315)

Wojdyr M (2010) Fityk: a general-purpose peak fitting program. J. Appl. Cryst. 43: 1126-1128. <https://doi.org/10.1107/S0021889810030499>

Wu DH, Chen AD, Johnson CS (1995) An improved diffusion-ordered spectroscopy experiment incorporating bipolar-gradient pulses. J. Magn. Reson. A 115: 260–264 <https://doi.org/10.1006/jmra.1995.1176>
